# Supplementary material
Source: publisher figshare collection journal article supplement (https://gsapubs.figshare.com/articles/dataset/_/12535541)

GSA Data Repository Item 2017306

Piraquive, A., Pinzón, E., Kammer, A., Bernet, M., and von Quadt, A., 2017, Early Neogene unroofing of the Sierra Nevada de Santa Marta, as determined from detrital geothermochronology and the petrology of clastic basin sediments: GSA Bulletin, <https://doi.org/10.1130/B31676.1>.

## **DATA REPOSITORY**

Table DR1. U, Pb and Th isotopic data obtained using the LA-ICP-MS

Table DR2. Zircon and apatite fission track data, from the sedimentary rocks of the Aracataca and Palomino basins

**TABLE DR2. ZIRCON AND APATITE FISSION TRACK DATA, FROM THE SEDIMENTARY ROCKS OF THE ARACATACA AND PALOMINO BASINS**

| Zircon Fission Track data                                                                                                                                                                                                       |                  |                   |               |               |              |         |    |          |       |      |                 |                                  |                                                     |      |                 |      |                 |       |                 |       |                 |  |
|---------------------------------------------------------------------------------------------------------------------------------------------------------------------------------------------------------------------------------|------------------|-------------------|---------------|---------------|--------------|---------|----|----------|-------|------|-----------------|----------------------------------|-----------------------------------------------------|------|-----------------|------|-----------------|-------|-----------------|-------|-----------------|--|
| Sample                                                                                                                                                                                                                          | Lithology        | Stratigraphic age | Elevation (m) | Latitude      | Longitude    | U (ppm) | 2σ | Grains n | Ns    | Ni   | Counted squares | ζ estimate (Ma.cm <sup>2</sup> ) | se(ζ) std error on ζ estimate (Ma.cm <sup>2</sup> ) | P1   | 2σ se(t) (Frac) | P2   | 2σ se(t) (Frac) | P3    | 2σ se(t) (Frac) | P4    | 2σ se(t) (Frac) |  |
| CP-088                                                                                                                                                                                                                          | Coarse Sandstone | Miocene           | 180           | 10°31'33"     | 74°03'13"    | 216     | 8  | 96       | 20034 | 5105 | 4606            | 141.03                           | 2.32                                                | 32.9 | ± 15 ( 2%)      | 64.9 | ± 5 (37.4%)     | 103.6 | ± 6.9 (60.7%)   |       |                 |  |
| CVI-1302                                                                                                                                                                                                                        | Conglomerate     | Miocene           | 150           | 10°35'18"     | 74°05'06"    | 226     | 10 | 68       | 11865 | 2566 | 2249            | 141.03                           | 2.32                                                | 29.2 | ± 3 (6.4%)      | 52   | ± 8 (18.9%)     | 103.8 | ± 6.6 (74.7%)   |       |                 |  |
| EMP-16                                                                                                                                                                                                                          | Conglomerate     | Lower Miocene     | 176           | 10°32'21"     | 74°03'50"    | 180     | 8  | 98       | 13572 | 2457 | 3441            | 128.02                           | 1.87                                                |      |                 | 56.8 | ± 11 (11.8%)    | 95.9  | ± 10 (72.5%)    | 140.9 | ± 29 (15.7%)    |  |
| EMP-49A                                                                                                                                                                                                                         | Conglomerate     | Lower Miocene     | 55            | 11°12'33"     | 73°30'17"    | 180     | 8  | 97       | 17574 | 3314 | 3996            | 128.02                           | 1.87                                                |      |                 | 74.4 | ± 7 (37.1%)     | 107.4 | ± 14 (52.8%)    | 158.4 | ± 52 (10.1%)    |  |
| AP-045                                                                                                                                                                                                                          | Conglomerate     | Miocene           | 55            | 11°13'12"     | 73°28'39"    | 89      | 4  | 101      | 17531 | 2781 | 6886            | 128.02                           | 1.87                                                | 41   | ± 13.1 (1.4%)   | 89.6 | ± 9.4 (38.6%)   | 131.6 | ± 11.6 (60.6%)  |       |                 |  |
| AP-046                                                                                                                                                                                                                          | Conglomerate     | Miocene           | 65            | 11°13' 7.99"  | 73°28' 41.4" | 97      | 5  | 158      | 13884 | 2172 | 4417            | 126.82                           | 2.05                                                | 32.9 | ± 6.3 (5.1%)    | 79.6 | ± 15.2 (9%)     | 129.4 | ± 12.1 (74.1%)  | 250.6 | ± 68.7 (11.7%)  |  |
| AP-050                                                                                                                                                                                                                          | Conglomerate     | Miocene           | 14            | 11°15' 29.78" | 73°36' 47.4" | 225     | 8  | 93       | 17166 | 5347 | 4696            | 126.82                           | 2.05                                                | 38.9 | ± 4.5 (14.6%)   | 54.8 | ± 3.7 (47.3%)   | 94    | ± 14.6 (20.1%)  | 154.8 | ± 27.5 (18%)    |  |
| EMP-35b                                                                                                                                                                                                                         | Conglomerate     | Miocene           | 0             | 11°15' 34.31" | 73°29' 53.1" | 129     | 6  | 99       | 15535 | 2288 | 3856            | 128.02                           | 1.87                                                |      |                 | 55.6 | ± 14.5 (1.8%)   | 104.9 | ± 7 (56.4)      | 170.5 | ± 21 (41.7%)    |  |
| Detrital Apatite                                                                                                                                                                                                                |                  |                   |               |               |              |         |    |          |       |      |                 |                                  |                                                     |      |                 |      |                 |       |                 |       |                 |  |
| Apatite Fission Track data                                                                                                                                                                                                      |                  |                   |               |               |              |         |    |          |       |      |                 |                                  |                                                     |      |                 |      |                 |       |                 |       |                 |  |
| Sample                                                                                                                                                                                                                          | Lithology        | Stratigraphic age | Elevation (m) | Latitude      | Longitude    | U (ppm) | 2σ | Grains n | Ns    | Ni   | Counted squares | ζ estimate (Ma.cm <sup>2</sup> ) | se(ζ) std error on ζ estimate (Ma.cm <sup>2</sup> ) | P1   | 2σ se(t) (Frac) | P2   | 2σ se(t) (Frac) | P3    | 2σ se(t) (Frac) |       |                 |  |
| CVI-1302                                                                                                                                                                                                                        | Conglomerate     | Miocene           | 150           | 10°35'18"     | 74°05'06"    | 41      | 1  | 35       | 1382  | 7662 | 3350            | 270.07                           | 6.38                                                | 19.2 | ± 4.2 (17.3%)   | 29.8 | ± 4.8 (48.8%)   | 42    | ± 5.7 (33.9%)   |       |                 |  |
| EMP-16                                                                                                                                                                                                                          | Conglomerate     | Lower Miocene     | 176           | 10°32'21"     | 74°03'50"    | 14      | 1  | 38       | 557   | 2169 | 3570            | 284.52                           | 5.65                                                |      |                 | 21.8 | ± 4 (41%)       | 59.9  | ± 9.3 (59%)     |       |                 |  |
| AP-045                                                                                                                                                                                                                          | Conglomerate     | Miocene           | 55            | 11°13'12"     | 73°28'39"    | 10      | 0  | 72       | 685   | 2369 | 5478            | 284.52                           | 5.65                                                |      |                 | 26.8 | ± 6.5 (31.3%)   | 52.3  | ± 6.3 (68.7%)   |       |                 |  |
| EMP-49A                                                                                                                                                                                                                         | Conglomerate     | Miocene           | 55            | 11°12'33"     | 73°30'17"    | 12      | 1  | 8        | 143   | 494  | 780             | 270.07                           | 6.38                                                |      |                 | 33.4 | ± 10.6 (72.6%)  | 59.2  | ± 36 (27.4%)    |       |                 |  |
| Note: n = total number of grains counted; binomial peak- fit ages are given ± 2SE. The percentage of grains in a specific peak is also given.                                                                                   |                  |                   |               |               |              |         |    |          |       |      |                 |                                  |                                                     |      |                 |      |                 |       |                 |       |                 |  |
| All samples were counted at <sup>1</sup> 1250 dry ( <sup>1</sup> 100 objective, 1.25 tube factor, 10 oculars). Apatite samples by by A. Piraquive ζ (CN-1) of 284.52 ± 5.65 ( ± 1SE). Samples CVI-1302, EMP-16, AP-045, EMP-49A |                  |                   |               |               |              |         |    |          |       |      |                 |                                  |                                                     |      |                 |      |                 |       |                 |       |                 |  |
| Zircon Samples EMP-16, EMP-49A, AP-45, AP-46, AP-50 and EMP-35b were counted by E. Pinzón (CN-1 zeta 128.02 ± 1.87).                                                                                                            |                  |                   |               |               |              |         |    |          |       |      |                 |                                  |                                                     |      |                 |      |                 |       |                 |       |                 |  |
| Zircon Samples CP-088 and CVI-1302 were counted by A. Piraquive (CN-1 zeta 141.03 ± 2.32). Depositional ages after Tschanz (1969)                                                                                               |                  |                   |               |               |              |         |    |          |       |      |                 |                                  |                                                     |      |                 |      |                 |       |                 |       |                 |  |
| Chi-squared test: values greater than 5% are considered to pass the test and represent a single age population.                                                                                                                 |                  |                   |               |               |              |         |    |          |       |      |                 |                                  |                                                     |      |                 |      |                 |       |                 |       |                 |  |

Merged dataset:

C:\BH2\Edna\6-2015\AP-046\AP\_046-2.FTZ

C:\BH2\Edna\6-2015\AP-046\AP\_046-1.ftz

**NEW PARAMETERS - ZETA METHOD**EFFECTIVE TRACK DENSITY FOR FLUENCE MONITOR (tracks/cm<sup>2</sup>): 3,06E+05

RELATIVE ERROR (%): 1,16

EFFECTIVE URANIUM CONTENT OF MONITOR (ppm): 50,00

ZETA FACTOR AND STANDARD ERROR (yr cm<sup>2</sup>): 126,82 2,05SIZE OF COUNTER SQUARE (cm<sup>2</sup>): 8,30E-07**GRAIN AGES IN ORIGINAL ORDER**

| Grain<br>no. | RhoS<br>(cm <sup>-2</sup> ) | (Ns)   | RhoI<br>(cm <sup>-2</sup> ) | (Ni)   | Squares | U+/-2s  | Grain Age (Ma) |            |        |
|--------------|-----------------------------|--------|-----------------------------|--------|---------|---------|----------------|------------|--------|
|              |                             |        |                             |        |         |         | Age            | --95% CI-- |        |
| 1            | 1,33E+06                    | ( 33)  | 1,20E+05                    | ( 3)   | 30      | 20 21   | 200.3          | 66.5       | 1004.1 |
| 2            | 8,66E+06                    | ( 115) | 2,26E+05                    | ( 3)   | 16      | 37 40   | 670.3          | 243.2      | 2896.0 |
| 3            | 4,02E+06                    | ( 70)  | 2,98E+06                    | ( 52)  | 21      | 488 135 | 26.0           | 17.9       | 38.0   |
| 4            | 2,85E+06                    | ( 71)  | 3,61E+05                    | ( 9)   | 30      | 59 38   | 148.8          | 75.7       | 339.0  |
| 5            | 4,50E+06                    | ( 56)  | 4,82E+05                    | ( 6)   | 15      | 79 62   | 174.2          | 77.6       | 494.5  |
| 6            | 4,22E+06                    | ( 84)  | 1,05E+06                    | ( 21)  | 24      | 172 75  | 76.6           | 47.4       | 130.4  |
| 7            | 6,43E+06                    | ( 320) | 1,06E+06                    | ( 53)  | 60      | 174 48  | 114.9          | 86.0       | 153.4  |
| 8            | 7,04E+06                    | ( 146) | 9,64E+05                    | ( 20)  | 25      | 158 70  | 139.0          | 87.7       | 234.3  |
| 9            | 2,83E+06                    | ( 47)  | 6,02E+05                    | ( 10)  | 20      | 99 61   | 89.3           | 45.2       | 199.1  |
| 10           | 1,53E+06                    | ( 61)  | 2,01E+05                    | ( 8)   | 48      | 33 23   | 143.6          | 70.0       | 348.2  |
| 11           | 5,02E+06                    | ( 150) | 4,35E+05                    | ( 13)  | 36      | 71 39   | 217.3          | 125.6      | 416.2  |
| 12           | 2,98E+06                    | ( 89)  | 3,68E+05                    | ( 11)  | 36      | 60 36   | 152.9          | 83.0       | 317.6  |
| 13           | 3,50E+06                    | ( 93)  | 4,14E+05                    | ( 11)  | 32      | 68 40   | 159.7          | 86.8       | 331.0  |
| 14           | 1,73E+06                    | ( 86)  | 3,82E+05                    | ( 19)  | 60      | 62 28   | 86.5           | 52.7       | 151.0  |
| 15           | 7,11E+06                    | ( 354) | 2,11E+06                    | ( 105) | 60      | 345 68  | 64.7           | 51.9       | 80.6   |
| 16           | 1,03E+07                    | ( 256) | 1,65E+06                    | ( 41)  | 30      | 269 84  | 119.5          | 86.1       | 170.5  |
| 17           | 1,79E+06                    | ( 89)  | 1,61E+05                    | ( 8)   | 60      | 26 18   | 208.3          | 103.9      | 495.4  |
| 18           | 3,31E+06                    | ( 275) | 3,25E+05                    | ( 27)  | 100     | 53 20   | 193.4          | 131.3      | 298.2  |
| 19           | 3,61E+06                    | ( 54)  | 1,00E+06                    | ( 15)  | 18      | 164 84  | 68.9           | 38.7       | 131.8  |
| 20           | 1,76E+06                    | ( 146) | 1,69E+05                    | ( 14)  | 100     | 28 15   | 196.9          | 115.6      | 368.3  |
| 21           | 6,53E+06                    | ( 130) | 7,53E+05                    | ( 15)  | 24      | 123 63  | 164.2          | 97.4       | 301.7  |
| 22           | 9,17E+06                    | ( 426) | 6,45E+05                    | ( 30)  | 56      | 106 38  | 268.1          | 187.0      | 400.5  |
| 23           | 1,48E+06                    | ( 60)  | 1,97E+05                    | ( 8)   | 49      | 32 22   | 141.3          | 68.8       | 342.8  |
| 24           | 1,72E+06                    | ( 143) | 1,93E+05                    | ( 16)  | 100     | 32 16   | 169.4          | 102.2      | 304.1  |
| 25           | 3,66E+06                    | ( 76)  | 7,23E+05                    | ( 15)  | 25      | 118 60  | 96.6           | 55.7       | 181.5  |
| 26           | 6,27E+06                    | ( 104) | 1,02E+06                    | ( 17)  | 20      | 168 80  | 116.5          | 70.2       | 208.0  |
| 27           | 9,98E+05                    | ( 58)  | 1,20E+05                    | ( 7)   | 70      | 20 14   | 155.5          | 72.7       | 404.2  |
| 28           | 7,68E+06                    | ( 153) | 1,36E+06                    | ( 27)  | 24      | 222 85  | 108.4          | 72.1       | 169.9  |
| 29           | 5,83E+06                    | ( 121) | 1,01E+06                    | ( 21)  | 25      | 166 72  | 110.0          | 69.4       | 184.4  |
| 30           | 3,64E+06                    | ( 151) | 4,82E+05                    | ( 20)  | 50      | 79 35   | 143.7          | 90.8       | 241.9  |
| 31           | 3,66E+06                    | ( 146) | 6,02E+05                    | ( 24)  | 48      | 99 40   | 116.2          | 75.7       | 187.3  |
| 32           | 1,90E+06                    | ( 158) | 1,93E+05                    | ( 16)  | 100     | 32 16   | 186.9          | 113.2      | 334.4  |
| 33           | 5,78E+06                    | ( 288) | 8,43E+05                    | ( 42)  | 60      | 138 42  | 131.1          | 95.1       | 185.8  |
| 34           | 1,12E+07                    | ( 84)  | 2,81E+06                    | ( 21)  | 9       | 460 199 | 76.6           | 47.4       | 130.4  |
| 35           | 4,88E+06                    | ( 385) | 5,83E+05                    | ( 46)  | 95      | 95 28   | 159.7          | 118.1      | 221.6  |
| 36           | 5,71E+06                    | ( 166) | 4,82E+05                    | ( 14)  | 35      | 79 41   | 223.4          | 131.7      | 416.0  |
| 37           | 3,04E+06                    | ( 53)  | 4,02E+05                    | ( 7)   | 21      | 66 48   | 142.2          | 66.1       | 371.8  |
| 38           | 1,08E+06                    | ( 44)  | 1,23E+05                    | ( 5)   | 49      | 20 17   | 163.7          | 67.4       | 528.9  |
| 39           | 2,11E+06                    | ( 70)  | 4,82E+05                    | ( 16)  | 40      | 79 39   | 83.6           | 48.5       | 154.6  |
| 40           | 7,48E+06                    | ( 621) | 1,19E+06                    | ( 99)  | 100     | 195 39  | 119.8          | 96.8       | 148.3  |
| 41           | 8,49E+06                    | ( 296) | 1,20E+06                    | ( 42)  | 42      | 197 61  | 134.7          | 97.8       | 190.8  |
| 42           | 4,63E+06                    | ( 73)  | 5,07E+05                    | ( 8)   | 19      | 83 57   | 171.4          | 84.6       | 411.7  |
| 43           | 2,70E+06                    | ( 179) | 3,92E+05                    | ( 26)  | 80      | 64 25   | 131.4          | 87.5       | 206.6  |
| 44           | 3,23E+06                    | ( 268) | 6,63E+05                    | ( 55)  | 100     | 108 29  | 92.9           | 69.5       | 124.1  |
| 45           | 2,98E+06                    | ( 99)  | 4,52E+05                    | ( 15)  | 40      | 74 38   | 125.5          | 73.5       | 233.0  |
| 46           | 2,25E+06                    | ( 140) | 1,77E+05                    | ( 11)  | 75      | 29 17   | 238.8          | 132.3      | 486.8  |
| 47           | 6,25E+06                    | ( 363) | 3,96E+05                    | ( 23)  | 70      | 65 27   | 296.9          | 197.5      | 471.3  |
| 48           | 3,83E+06                    | ( 127) | 3,61E+05                    | ( 12)  | 40      | 59 33   | 199.5          | 112.4      | 395.2  |
| 49           | 1,89E+06                    | ( 47)  | 5,22E+05                    | ( 13)  | 30      | 85 47   | 69.1           | 37.2       | 139.7  |
| 50           | 1,03E+06                    | ( 77)  | 1,61E+05                    | ( 12)  | 90      | 26 15   | 121.8          | 66.9       | 246.4  |
| 51           | 4,78E+06                    | ( 119) | 1,61E+05                    | ( 4)   | 30      | 26 25   | 532.4          | 215.6      | 1856.3 |
| 52           | 3,49E+06                    | ( 290) | 4,22E+05                    | ( 35)  | 100     | 69 23   | 158.0          | 111.8      | 231.0  |

Merged dataset:

C:\BH2\Edna\6-2015\AP-046\AP\_046-2.FTZ

C:\BH2\Edna\6-2015\AP-046\AP\_046-1.ftz

| Grain<br>no. | RhoS<br>(cm <sup>-2</sup> ) | (Ns)   | RhoI<br>(cm <sup>-2</sup> ) | (Ni)  | Squares | U+/-2s | Grain Age (Ma) |            |        |
|--------------|-----------------------------|--------|-----------------------------|-------|---------|--------|----------------|------------|--------|
|              |                             |        |                             |       |         |        | Age            | --95% CI-- |        |
| 53           | 3,33E+06                    | ( 276) | 4,94E+05                    | ( 41) | 100     | 81 25  | 128.7          | 93.0       | 183.3  |
| 54           | 9,24E+05                    | ( 46)  | 1,41E+05                    | ( 7)  | 60      | 23 17  | 123.7          | 56.8       | 326.0  |
| 55           | 3,99E+06                    | ( 53)  | 6,78E+05                    | ( 9)  | 16      | 111 72 | 111.5          | 55.5       | 258.0  |
| 56           | 2,61E+06                    | ( 26)  | 2,01E+05                    | ( 2)  | 12      | 33 42  | 231.0          | 62.7       | 1885.8 |
| 57           | 5,18E+06                    | ( 86)  | 1,14E+06                    | ( 19) | 20      | 187 85 | 86.5           | 52.7       | 151.0  |
| 58           | 2,51E+06                    | ( 75)  | 2,01E+05                    | ( 6)  | 36      | 33 26  | 232.1          | 105.3      | 647.6  |

Merged dataset:

C:\BH2\Edna\6-2015\AP-046\AP\_046-2.FTZ

C:\BH2\Edna\6-2015\AP-046\AP\_046-1.ftz

**NEW PARAMETERS - ZETA METHOD**EFFECTIVE TRACK DENSITY FOR FLUENCE MONITOR (tracks/cm<sup>2</sup>): 3,06E+05

RELATIVE ERROR (%): 1,17

EFFECTIVE URANIUM CONTENT OF MONITOR (ppm): 50,00

ZETA FACTOR AND STANDARD ERROR (yr cm<sup>2</sup>): 126,82 2,05SIZE OF COUNTER SQUARE (cm<sup>2</sup>): 8,30E-07

| Grain<br>no. | RhoS<br>(cm <sup>-2</sup> ) | (Ns)    | RhoI<br>(cm <sup>-2</sup> ) | (Ni)    | Squares | U+/-2s  | Grain Age (Ma) | Age   | --95% CI-- |
|--------------|-----------------------------|---------|-----------------------------|---------|---------|---------|----------------|-------|------------|
| 59           | 6,02E+06                    | ( 250)  | 8,19E+05                    | ( 34)   | 50      | 134 46  | 140.5          | 98.6  | 207.4      |
| 60           | 4,06E+06                    | ( 101)  | 3,61E+05                    | ( 9)    | 30      | 59 38   | 210.7          | 109.3 | 472.4      |
| 61           | 2,53E+06                    | ( 147)  | 3,96E+05                    | ( 23)   | 70      | 65 27   | 122.1          | 79.0  | 198.8      |
| 62           | 6,69E+06                    | ( 50)   | 9,37E+05                    | ( 7)    | 9       | 153 112 | 134.5          | 62.2  | 352.6      |
| 63           | 1,97E+06                    | ( 80)   | 1,72E+05                    | ( 7)    | 49      | 28 21   | 213.6          | 101.9 | 545.7      |
| 64           | 6,02E+06                    | ( 100)  | 1,45E+06                    | ( 24)   | 20      | 236 96  | 79.9           | 51.1  | 130.8      |
| 65           | 6,61E+06                    | ( 351)  | 1,45E+06                    | ( 77)   | 64      | 237 54  | 87.3           | 68.2  | 111.8      |
| 66           | 9,29E+05                    | ( 27)   | 2,41E+05                    | ( 7)    | 35      | 39 29   | 73.2           | 31.7  | 200.5      |
| 67           | 4,76E+06                    | ( 79)   | 7,83E+05                    | ( 13)   | 20      | 128 70  | 115.6          | 64.8  | 227.2      |
| 68           | 3,27E+06                    | ( 114)  | 5,45E+05                    | ( 19)   | 42      | 89 40   | 114.6          | 70.8  | 197.5      |
| 69           | 3,10E+06                    | ( 108)  | 5,45E+05                    | ( 19)   | 42      | 89 40   | 108.6          | 66.9  | 187.6      |
| 70           | 3,07E+06                    | ( 252)  | 4,75E+05                    | ( 39)   | 99      | 78 25   | 123.7          | 88.5  | 178.2      |
| 71           | 4,70E+06                    | ( 195)  | 7,23E+05                    | ( 30)   | 50      | 118 43  | 124.3          | 84.9  | 189.3      |
| 72           | 1,14E+06                    | ( 57)   | 2,41E+05                    | ( 12)   | 60      | 39 22   | 90.5           | 48.7  | 186.1      |
| 73           | 1,08E+06                    | ( 27)   | 2,81E+05                    | ( 7)    | 30      | 46 34   | 73.2           | 31.7  | 200.5      |
| 74           | 6,27E+06                    | ( 156)  | 1,04E+06                    | ( 26)   | 30      | 171 66  | 114.8          | 76.0  | 181.3      |
| 75           | 7,92E+06                    | ( 322)  | 1,20E+06                    | ( 49)   | 49      | 197 56  | 125.9          | 93.4  | 173.7      |
| 76           | 5,16E+06                    | ( 60)   | 1,12E+06                    | ( 13)   | 14      | 183 100 | 88.1           | 48.4  | 175.5      |
| 77           | 1,45E+06                    | ( 42)   | 7,23E+05                    | ( 21)   | 35      | 118 51  | 38.5           | 22.4  | 68.7       |
| 78           | 6,20E+06                    | ( 72)   | 1,46E+06                    | ( 17)   | 14      | 239 114 | 81.1           | 47.7  | 147.1      |
| 79           | 1,42E+06                    | ( 59)   | 1,69E+05                    | ( 7)    | 50      | 28 20   | 158.3          | 74.1  | 411.2      |
| 80           | 4,31E+06                    | ( 143)  | 3,92E+05                    | ( 13)   | 40      | 64 35   | 207.6          | 119.7 | 398.3      |
| 81           | 3,15E+06                    | ( 94)   | 3,68E+05                    | ( 11)   | 36      | 60 36   | 161.6          | 87.9  | 334.8      |
| 82           | 1,05E+06                    | ( 21)   | 4,02E+05                    | ( 8)    | 24      | 66 45   | 50.1           | 21.6  | 131.7      |
| 83           | 5,16E+06                    | ( 210)  | 8,85E+05                    | ( 36)   | 49      | 145 48  | 111.8          | 78.6  | 164.0      |
| 84           | 2,28E+06                    | ( 34)   | 2,68E+05                    | ( 4)    | 18      | 44 41   | 157.4          | 58.5  | 610.2      |
| 85           | 1,41E+06                    | ( 35)   | 3,61E+05                    | ( 9)    | 30      | 59 38   | 74.0           | 35.4  | 176.1      |
| 86           | 3,51E+06                    | ( 70)   | 7,03E+05                    | ( 14)   | 24      | 115 60  | 95.4           | 53.9  | 184.0      |
| 87           | 3,21E+06                    | ( 24)   | 1,34E+05                    | ( 1)    | 9       | 22 36   | 396.5          | 75.5  | 8889.8     |
| 88           | 7,03E+06                    | ( 70)   | 1,10E+06                    | ( 11)   | 12      | 180 107 | 120.8          | 64.6  | 253.7      |
| 89           | 3,66E+06                    | ( 73)   | 6,02E+05                    | ( 12)   | 24      | 98 56   | 115.7          | 63.3  | 234.6      |
| 90           | 3,60E+06                    | ( 209)  | 4,30E+05                    | ( 25)   | 70      | 70 28   | 159.3          | 105.9 | 251.6      |
| 91           | 7,23E+06                    | ( 108)  | 1,27E+06                    | ( 19)   | 18      | 208 94  | 108.6          | 66.9  | 187.6      |
| 92           | 8,78E+05                    | ( 51)   | 4,99E+05                    | ( 29)   | 70      | 82 30   | 34.0           | 21.2  | 55.6       |
| 93           | 6,57E+06                    | ( 229)  | 8,89E+05                    | ( 31)   | 42      | 145 52  | 141.1          | 97.4  | 212.5      |
| 94           | 2,74E+06                    | ( 91)   | 1,57E+06                    | ( 52)   | 40      | 256 71  | 33.8           | 23.8  | 48.6       |
| 95           | 1,78E+06                    | ( 59)   | 9,34E+05                    | ( 31)   | 40      | 153 54  | 36.7           | 23.5  | 58.8       |
| 96           | 4,95E+06                    | ( 411)  | 6,75E+05                    | ( 56)   | 100     | 110 29  | 139.6          | 105.7 | 184.3      |
| 97           | 7,88E+06                    | ( 157)  | 6,53E+05                    | ( 13)   | 24      | 107 58  | 227.6          | 131.7 | 435.1      |
| 98           | 4,47E+06                    | ( 89)   | 9,54E+05                    | ( 19)   | 24      | 156 71  | 89.6           | 54.7  | 156.2      |
| 99           | 1,87E+06                    | ( 31)   | 2,41E+05                    | ( 4)    | 20      | 39 37   | 143.7          | 52.9  | 561.3      |
| 100          | 7,11E+06                    | ( 354)  | 1,20E+06                    | ( 60)   | 60      | 197 51  | 112.6          | 85.6  | 147.8      |
| POOLED       | 3,79E+06                    | (13884) | 5,92E+05                    | ( 2172) | 4417    | 97 5    | 122.7          | 115.6 | 130.2      |

CHI<sup>2</sup> PROBABILITY (%): 0.0

POOLED AGE W/ 68% CONF. INTERVAL(Ma): 122.7, 119.0 -- 126.4 ( -3.6 +3.8)  
 95% CONF. INTERVAL(Ma): 115.6 -- 130.2 ( -7.0 +7.5)

CENTRAL AGE W/ 68% CONF. INTERVAL(Ma): 117.6, 111.0 -- 124.5 ( -6.6 +6.9)  
 95% CONF. INTERVAL(Ma): 105.1 -- 131.6 ( -12.5 +14.0)  
 AGE DISPERSION (%): 47.2

Merged dataset:

C:\BH2\Edna\6-2015\AP-046\AP\_046-2.FTZ

C:\BH2\Edna\6-2015\AP-046\AP\_046-1.ftz

FIT OPTION: Best-fit peaks using the binomial model of Galbraith and Green

**INITIAL GUESS FOR MODEL PARAMETERS (number of peaks to fit = 4)**

| Peak #. | Peak Age | Theta | Fraction(%) | Count |
|---------|----------|-------|-------------|-------|
| 1.      | 64.80    | 0.771 | 9.6         | 9.65  |
| 2.      | 86.80    | 0.819 | 20.8        | 20.82 |
| 3.      | 122.60   | 0.865 | 41.5        | 41.48 |
| 4.      | 202.50   | 0.914 | 16.2        | 16.21 |

Total range for grain ages: 26,0 to 609,7 Ma  
 Number of active grains (Num. used for fit): 100  
 Number of removed grains: 0  
 Degrees of freedom for fit: 93  
 Average of the SE(Z)'s for the grains: 0,31  
 Estimated width of peaks in PD plot in Z units: 0,36

**PARAMETERS FOR BEST-FIT PEAKS**

\* Standard error for peak age includes group error

\* Peak width is for PD plot assuming a kernel factor = 0.60

| #. | Peak Age(Ma) | 68%CI          | 95%CI          | W(Z) | Frac(%) | SE,% | Count |
|----|--------------|----------------|----------------|------|---------|------|-------|
| 1. | 32.9         | -3,0 ...+3,3   | -5,7 ...+6,9   | 0.25 | 5.1     | 2.3  | 5.1   |
| 2. | 79.6         | -7,3 ...+8,1   | -13,7 ...+16,5 | 0.22 | 9.0     | 6.1  | 9.0   |
| 3. | 129.4        | -6,0 ...+6,3   | -11,6 ...+12,7 | 0.27 | 74.1    | 8.0  | 74.1  |
| 4. | 250.6        | -30,8 ...+35,1 | -56,9 ...+73,3 | 0.34 | 11.7    | 6.2  | 11.7  |

Log-likelihood for best fit: -324,328  
 Chi-squared value for best fit: 93,580  
 Reduced chi-squared value: 1,006  
 Probability for F test: 4%  
 Condition number for COVAR matrix: 51,79  
 Number of iterations: 17

Merged dataset:

C:\BH2\Edna\6-2015\AP-046\AP\_046-2.FTZ

C:\BH2\Edna\6-2015\AP-046\AP\_046-1.ftz

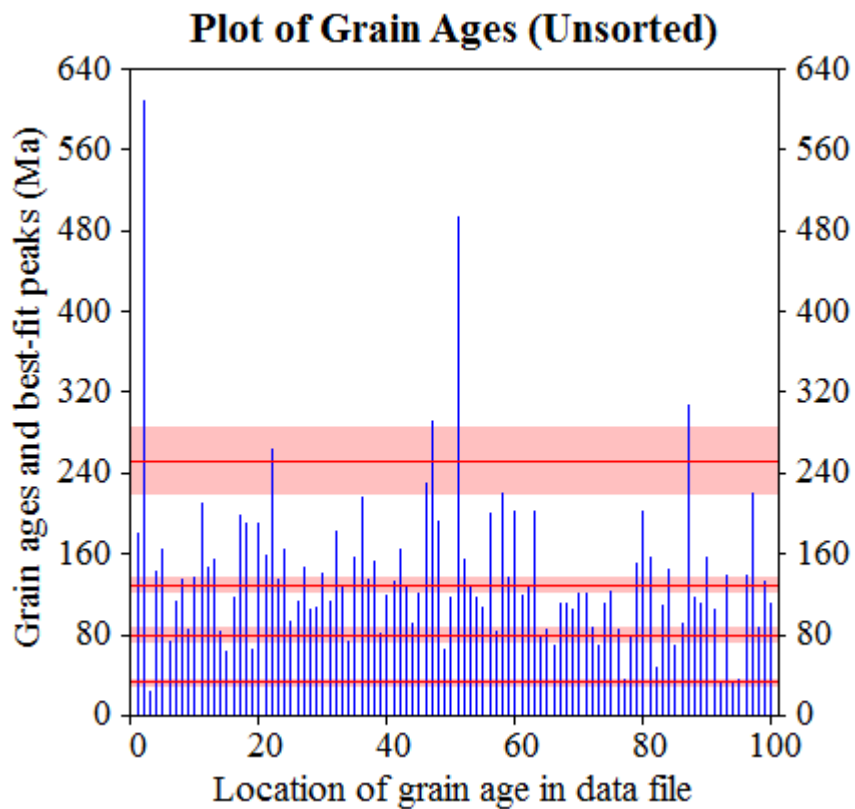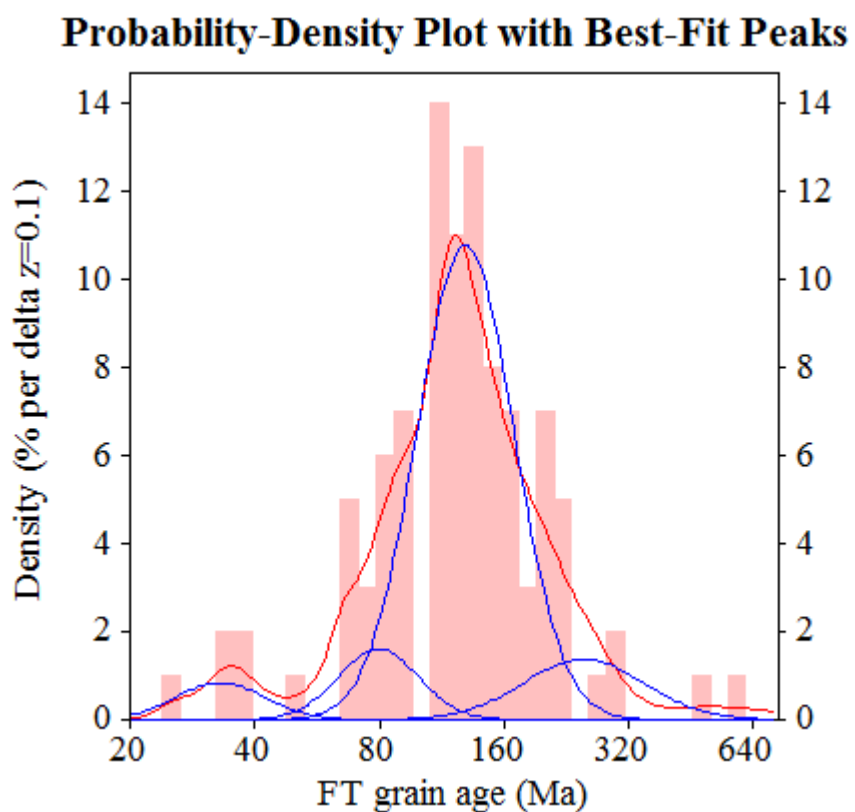

Merged dataset:

C:\BH2\Edna\6-2015\AP-046\AP\_046-2.FTZ

C:\BH2\Edna\6-2015\AP-046\AP\_046-1.ftz

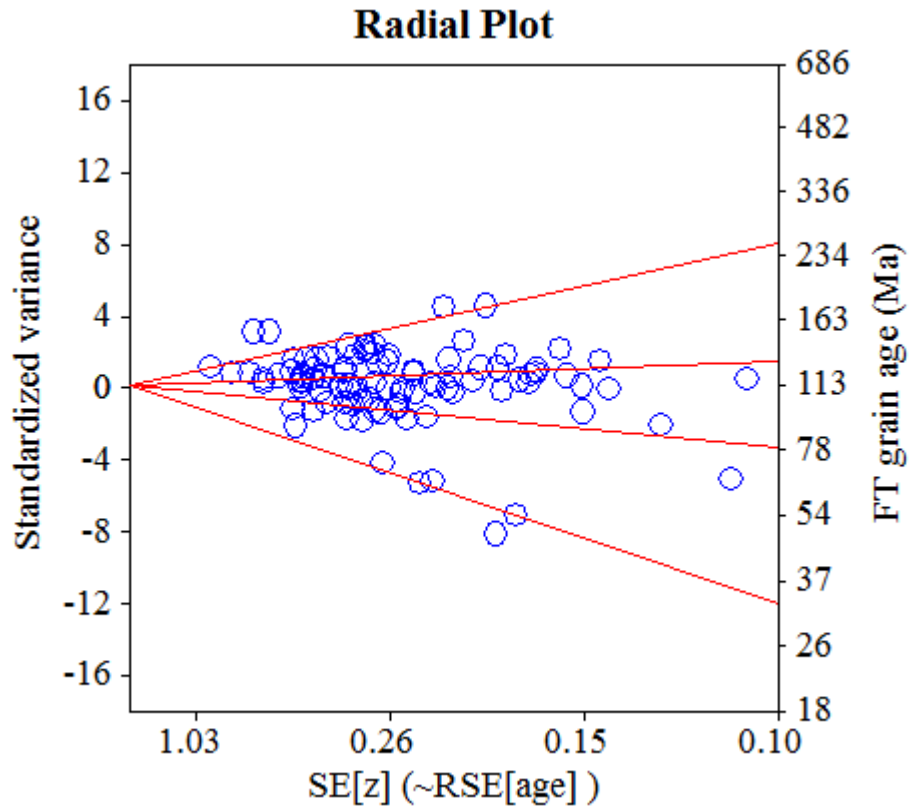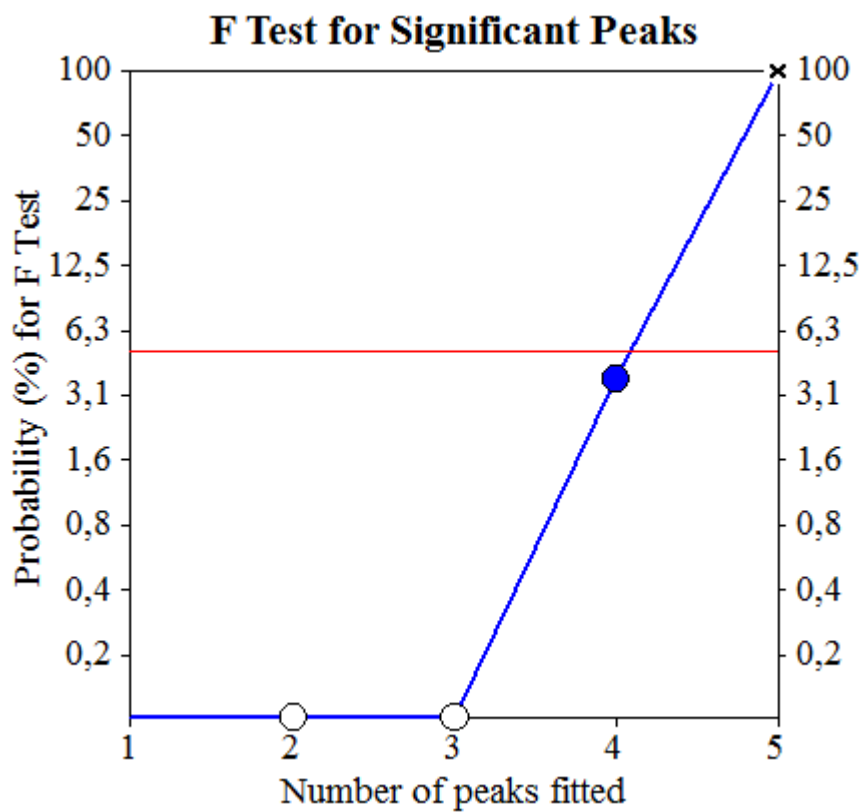



Merged dataset:

C:\BH2\Edna\6-2015\AP-050\AP\_050-2A1FTZ

C:\BH2\Edna\6-2015\AP-050\AP\_050-1.ftz

**NEW PARAMETERS - ZETA METHOD**EFFECTIVE TRACK DENSITY FOR FLUENCE MONITOR (tracks/cm<sup>2</sup>): 3,04E+05

RELATIVE ERROR (%): 1,14

EFFECTIVE URANIUM CONTENT OF MONITOR (ppm): 50,00

ZETA FACTOR AND STANDARD ERROR (yr cm<sup>2</sup>): 126,82 2,05SIZE OF COUNTER SQUARE (cm<sup>2</sup>): 8,30E-07**GRAIN AGES IN ORIGINAL ORDER**

| Grain<br>no. | RhoS<br>(cm <sup>-2</sup> ) | (Ns)   | RhoI<br>(cm <sup>-2</sup> ) | (Ni)   | Squares | U+/-2s  | Grain Age (Ma) |            |        |
|--------------|-----------------------------|--------|-----------------------------|--------|---------|---------|----------------|------------|--------|
|              |                             |        |                             |        |         |         | Age            | --95% CI-- |        |
| 1            | 4,13E+06                    | ( 144) | 2,01E+05                    | ( 7)   | 42      | 33 24   | 377.2          | 185.1      | 934.5  |
| 2            | 3,84E+06                    | ( 255) | 1,93E+06                    | ( 128) | 80      | 317 56  | 38.2           | 30.8       | 47.3   |
| 3            | 9,94E+06                    | ( 165) | 2,23E+06                    | ( 37)  | 20      | 366 120 | 85.2           | 59.6       | 125.4  |
| 4            | 4,53E+06                    | ( 263) | 1,45E+06                    | ( 84)  | 70      | 237 52  | 59.8           | 46.7       | 76.5   |
| 5            | 6,66E+06                    | ( 221) | 1,08E+06                    | ( 36)  | 40      | 178 59  | 117.0          | 82.4       | 171.4  |
| 6            | 6,49E+06                    | ( 264) | 6,64E+05                    | ( 27)  | 49      | 109 42  | 185.0          | 125.5      | 285.6  |
| 7            | 2,14E+06                    | ( 71)  | 2,71E+05                    | ( 9)   | 40      | 45 29   | 148.2          | 75.4       | 337.7  |
| 8            | 5,12E+06                    | ( 153) | 1,41E+06                    | ( 42)  | 36      | 231 71  | 69.7           | 49.5       | 100.7  |
| 9            | 5,66E+06                    | ( 94)  | 3,01E+05                    | ( 5)   | 20      | 49 42   | 342.8          | 148.3      | 1053.0 |
| 10           | 4,82E+06                    | ( 120) | 1,85E+06                    | ( 46)  | 30      | 303 89  | 50.1           | 35.4       | 72.0   |
| 11           | 1,70E+06                    | ( 113) | 2,11E+05                    | ( 14)  | 80      | 35 18   | 152.4          | 88.5       | 287.7  |
| 12           | 5,71E+06                    | ( 166) | 7,23E+05                    | ( 21)  | 35      | 119 51  | 149.8          | 95.8       | 248.3  |
| 13           | 4,72E+06                    | ( 47)  | 1,00E+06                    | ( 10)  | 12      | 165 102 | 89.0           | 45.1       | 198.4  |
| 14           | 4,80E+06                    | ( 319) | 5,87E+05                    | ( 39)  | 80      | 96 31   | 155.4          | 111.9      | 222.5  |
| 15           | 3,17E+06                    | ( 158) | 1,51E+06                    | ( 75)  | 60      | 247 57  | 40.3           | 30.6       | 53.1   |
| 16           | 6,55E+06                    | ( 136) | 1,30E+06                    | ( 27)  | 25      | 214 82  | 96.0           | 63.6       | 151.2  |
| 17           | 2,86E+06                    | ( 190) | 5,57E+05                    | ( 37)  | 80      | 92 30   | 98.0           | 69.0       | 143.6  |
| 18           | 3,41E+06                    | ( 198) | 1,70E+06                    | ( 99)  | 70      | 280 56  | 38.3           | 30.0       | 48.8   |
| 19           | 5,69E+06                    | ( 85)  | 1,54E+06                    | ( 23)  | 18      | 253 104 | 70.6           | 44.4       | 117.5  |
| 20           | 4,39E+06                    | ( 91)  | 1,54E+06                    | ( 32)  | 25      | 253 89  | 54.5           | 36.2       | 84.4   |
| 21           | 4,42E+06                    | ( 33)  | 6,69E+05                    | ( 5)   | 9       | 110 94  | 122.8          | 49.2       | 405.1  |
| 22           | 3,98E+06                    | ( 132) | 1,69E+06                    | ( 56)  | 40      | 277 74  | 45.3           | 32.9       | 63.1   |
| 23           | 4,60E+06                    | ( 382) | 1,57E+06                    | ( 130) | 100     | 257 45  | 56.3           | 46.0       | 68.8   |
| 24           | 8,43E+06                    | ( 84)  | 1,71E+06                    | ( 17)  | 12      | 280 134 | 94.0           | 55.9       | 169.2  |
| 25           | 2,33E+06                    | ( 31)  | 7,53E+05                    | ( 10)  | 16      | 124 76  | 58.9           | 28.5       | 135.4  |
| 26           | 5,01E+06                    | ( 208) | 1,37E+06                    | ( 57)  | 50      | 226 60  | 69.9           | 52.1       | 95.5   |
| 27           | 4,46E+06                    | ( 148) | 1,96E+06                    | ( 65)  | 40      | 322 80  | 43.5           | 32.5       | 58.2   |
| 28           | 7,99E+06                    | ( 232) | 1,20E+06                    | ( 35)  | 35      | 198 67  | 126.2          | 88.7       | 185.6  |
| 29           | 4,81E+06                    | ( 399) | 9,76E+05                    | ( 81)  | 100     | 160 36  | 93.8           | 73.8       | 119.2  |
| 30           | 6,44E+06                    | ( 171) | 7,91E+05                    | ( 21)  | 32      | 130 56  | 154.2          | 98.8       | 255.5  |
| 31           | 5,20E+06                    | ( 108) | 1,73E+06                    | ( 36)  | 25      | 285 95  | 57.5           | 39.2       | 86.4   |
| 32           | 8,19E+06                    | ( 408) | 2,53E+06                    | ( 126) | 60      | 416 75  | 62.0           | 50.6       | 75.8   |
| 33           | 3,41E+06                    | ( 198) | 6,88E+05                    | ( 40)  | 70      | 113 36  | 94.5           | 67.3       | 136.5  |
| 34           | 4,99E+06                    | ( 145) | 5,51E+05                    | ( 16)  | 35      | 90 45   | 171.1          | 103.3      | 306.9  |
| 35           | 5,16E+06                    | ( 214) | 1,13E+06                    | ( 47)  | 50      | 186 54  | 87.1           | 63.5       | 122.2  |
| 36           | 3,04E+06                    | ( 252) | 1,00E+06                    | ( 83)  | 100     | 164 36  | 58.0           | 45.2       | 74.4   |
| 37           | 4,55E+06                    | ( 378) | 1,49E+06                    | ( 124) | 100     | 245 44  | 58.3           | 47.5       | 71.6   |
| 38           | 5,62E+06                    | ( 112) | 1,46E+06                    | ( 29)  | 24      | 239 88  | 73.8           | 49.0       | 115.4  |
| 39           | 1,87E+06                    | ( 124) | 3,31E+05                    | ( 22)  | 80      | 54 23   | 107.2          | 68.3       | 177.5  |
| 40           | 2,54E+06                    | ( 76)  | 6,36E+05                    | ( 19)  | 36      | 104 47  | 76.3           | 46.0       | 133.9  |
| 41           | 8,73E+06                    | ( 87)  | 1,51E+06                    | ( 15)  | 12      | 247 126 | 110.0          | 63.9       | 205.4  |
| 42           | 5,09E+06                    | ( 296) | 2,08E+06                    | ( 121) | 70      | 342 63  | 46.9           | 37.8       | 58.0   |
| 43           | 5,31E+06                    | ( 141) | 2,90E+06                    | ( 77)  | 32      | 476 109 | 35.0           | 26.5       | 46.3   |
| 44           | 4,61E+06                    | ( 268) | 1,03E+06                    | ( 60)  | 70      | 170 44  | 85.0           | 64.2       | 112.4  |
| 45           | 4,50E+06                    | ( 56)  | 1,61E+06                    | ( 20)  | 15      | 264 117 | 53.5           | 31.8       | 94.4   |
| 46           | 5,50E+06                    | ( 219) | 8,53E+05                    | ( 34)  | 48      | 140 48  | 122.7          | 85.7       | 181.7  |
| 47           | 5,83E+06                    | ( 121) | 9,64E+05                    | ( 20)  | 25      | 158 70  | 115.0          | 71.9       | 195.1  |
| 48           | 6,02E+06                    | ( 80)  | 2,33E+06                    | ( 31)  | 16      | 383 137 | 49.5           | 32.4       | 77.6   |
| 49           | 4,75E+06                    | ( 197) | 2,55E+06                    | ( 106) | 50      | 420 82  | 35.6           | 28.1       | 45.2   |
| 50           | 6,78E+06                    | ( 563) | 2,22E+06                    | ( 184) | 100     | 364 54  | 58.6           | 49.5       | 69.5   |
| 51           | 3,54E+06                    | ( 294) | 1,30E+06                    | ( 108) | 100     | 214 41  | 52.1           | 41.7       | 65.1   |
| 52           | 5,83E+06                    | ( 237) | 2,26E+06                    | ( 92)  | 49      | 372 78  | 49.3           | 38.7       | 62.8   |

Merged dataset:

C:\BH2\Edna\6-2015\AP-050\AP\_050-2A.FTZ

C:\BH2\Edna\6-2015\AP-050\AP\_050-1.ftz

| Grain<br>no. | RhoS<br>(cm <sup>-2</sup> ) | (Ns)   | RhoI<br>(cm <sup>-2</sup> ) | (Ni)   | Squares | U+/-2s  | Grain Age (Ma) |            |       |
|--------------|-----------------------------|--------|-----------------------------|--------|---------|---------|----------------|------------|-------|
|              |                             |        |                             |        |         |         | Age            | --95% CI-- |       |
| 53           | 4,75E+06                    | ( 197) | 1,54E+06                    | ( 64)  | 50      | 253 63  | 58.7           | 44.2       | 77.8  |
| 54           | 4,67E+06                    | ( 388) | 1,42E+06                    | ( 118) | 100     | 234 43  | 62.9           | 51.1       | 77.5  |
| 55           | 4,55E+06                    | ( 151) | 1,75E+06                    | ( 58)  | 40      | 287 75  | 50.0           | 36.8       | 68.9  |
| 56           | 5,42E+06                    | ( 135) | 1,73E+06                    | ( 43)  | 30      | 284 86  | 60.2           | 42.5       | 87.0  |
| 57           | 4,92E+06                    | ( 204) | 1,88E+06                    | ( 78)  | 50      | 309 70  | 50.0           | 38.5       | 64.9  |
| 58           | 4,71E+06                    | ( 313) | 1,70E+06                    | ( 113) | 80      | 280 53  | 53.0           | 42.7       | 65.9  |
| 59           | 3,52E+06                    | ( 292) | 1,61E+06                    | ( 134) | 100     | 265 46  | 41.8           | 34.0       | 51.4  |
| 60           | 3,10E+06                    | ( 90)  | 1,10E+06                    | ( 32)  | 35      | 181 64  | 53.9           | 35.8       | 83.5  |
| 61           | 1,19E+07                    | ( 158) | 1,43E+06                    | ( 19)  | 16      | 235 107 | 157.4          | 98.6       | 268.2 |
| 62           | 1,05E+07                    | ( 174) | 4,28E+06                    | ( 71)  | 20      | 703 167 | 46.8           | 35.5       | 61.7  |
| 63           | 5,07E+06                    | ( 202) | 2,11E+06                    | ( 84)  | 48      | 346 76  | 46.0           | 35.6       | 59.4  |
| 64           | 5,64E+06                    | ( 117) | 7,23E+05                    | ( 15)  | 25      | 119 60  | 147.4          | 87.0       | 271.9 |
| 65           | 6,02E+06                    | ( 300) | 2,41E+06                    | ( 120) | 60      | 396 73  | 47.9           | 38.7       | 59.3  |
| 66           | 4,54E+06                    | ( 226) | 1,65E+06                    | ( 82)  | 60      | 270 60  | 52.7           | 40.9       | 67.9  |
| 67           | 4,42E+06                    | ( 55)  | 8,03E+05                    | ( 10)  | 15      | 132 81  | 103.9          | 53.4       | 229.6 |
| 68           | 4,72E+06                    | ( 274) | 1,22E+06                    | ( 71)  | 70      | 201 48  | 73.6           | 56.6       | 95.5  |
| 69           | 2,65E+06                    | ( 77)  | 1,96E+06                    | ( 57)  | 35      | 322 85  | 26.0           | 18.2       | 37.3  |
| 70           | 4,08E+06                    | ( 339) | 2,14E+06                    | ( 178) | 100     | 352 53  | 36.6           | 30.4       | 44.0  |
| 71           | 3,95E+06                    | ( 164) | 2,19E+06                    | ( 91)  | 50      | 360 76  | 34.5           | 26.7       | 44.7  |
| 72           | 4,82E+06                    | ( 240) | 1,79E+06                    | ( 89)  | 60      | 294 62  | 51.6           | 40.4       | 65.9  |
| 73           | 5,06E+06                    | ( 126) | 7,23E+05                    | ( 18)  | 30      | 119 55  | 132.7          | 81.5       | 231.3 |
| 74           | 2,41E+06                    | ( 40)  | 2,41E+05                    | ( 4)   | 20      | 40 37   | 183.7          | 69.4       | 703.2 |
| 75           | 4,73E+06                    | ( 110) | 4,73E+05                    | ( 11)  | 28      | 78 46   | 187.7          | 102.9      | 386.3 |
| 76           | 4,04E+06                    | ( 67)  | 2,17E+06                    | ( 36)  | 20      | 356 118 | 35.8           | 23.6       | 55.3  |
| 77           | 4,30E+06                    | ( 125) | 7,23E+05                    | ( 21)  | 35      | 119 51  | 113.2          | 71.6       | 189.4 |

Merged dataset:

C:\BH2\Edna\6-2015\AP-050\AP\_050-2A.FTZ

C:\BH2\Edna\6-2015\AP-050\AP\_050-1.ftz

**NEW PARAMETERS - ZETA METHOD**EFFECTIVE TRACK DENSITY FOR FLUENCE MONITOR (tracks/cm<sup>2</sup>): 3,05E+05

RELATIVE ERROR (%): 1,14

EFFECTIVE URANIUM CONTENT OF MONITOR (ppm): 50,00

ZETA FACTOR AND STANDARD ERROR (yr cm<sup>2</sup>): 126,82 2,05SIZE OF COUNTER SQUARE (cm<sup>2</sup>): 8,30E-07

| Grain<br>no. | RhoS<br>(cm <sup>-2</sup> ) | (Ns)             | RhoI<br>(cm <sup>-2</sup> ) | (Ni)   | Squares | U+/-2s  | Grain Age (Ma) |            |       |
|--------------|-----------------------------|------------------|-----------------------------|--------|---------|---------|----------------|------------|-------|
|              |                             |                  |                             |        |         |         | Age            | --95% CI-- |       |
| 78           | 5,27E+06                    | ( 328)           | 1,70E+06                    | ( 106) | 75      | 279 55  | 59.3           | 47.5       | 73.9  |
| 79           | 3,57E+06                    | ( 296)           | 1,19E+06                    | ( 99)  | 100     | 196 39  | 57.3           | 45.5       | 72.0  |
| 80           | 3,19E+06                    | ( 238)           | 6,56E+05                    | ( 49)  | 90      | 108 31  | 93.0           | 68.4       | 129.2 |
| 81           | 3,23E+06                    | ( 268)           | 1,36E+06                    | ( 113) | 100     | 223 42  | 45.5           | 36.4       | 56.8  |
| 82           | 3,60E+06                    | ( 239)           | 1,17E+06                    | ( 78)  | 80      | 193 44  | 58.6           | 45.3       | 75.7  |
| 83           | 4,56E+06                    | ( 159)           | 2,18E+06                    | ( 76)  | 42      | 358 82  | 40.1           | 30.4       | 52.7  |
| 84           | 3,98E+06                    | ( 330)           | 1,51E+06                    | ( 125) | 100     | 247 44  | 50.6           | 41.1       | 62.3  |
| 85           | 3,96E+06                    | ( 263)           | 1,45E+06                    | ( 96)  | 80      | 237 49  | 52.5           | 41.5       | 66.4  |
| 86           | 1,39E+06                    | ( 115)           | 3,37E+05                    | ( 28)  | 100     | 55 21   | 78.6           | 51.9       | 123.6 |
| 87           | 5,46E+06                    | ( 136)           | 2,17E+06                    | ( 54)  | 30      | 356 97  | 48.4           | 35.1       | 67.7  |
| 88           | 2,74E+06                    | ( 91)            | 6,93E+05                    | ( 23)  | 40      | 114 47  | 75.6           | 47.8       | 125.5 |
| 89           | 6,58E+06                    | ( 131)           | 2,61E+06                    | ( 52)  | 24      | 428 119 | 48.4           | 34.9       | 68.2  |
| 90           | 2,60E+06                    | ( 54)            | 1,20E+06                    | ( 25)  | 25      | 198 78  | 41.5           | 25.5       | 69.7  |
| 91           | 1,36E+06                    | ( 54)            | 4,52E+05                    | ( 18)  | 48      | 74 35   | 57.4           | 33.4       | 104.3 |
| 92           | 3,92E+06                    | ( 130)           | 1,54E+06                    | ( 51)  | 40      | 252 70  | 49.0           | 35.3       | 69.2  |
| 93           | 4,63E+06                    | ( 123)           | 2,00E+06                    | ( 53)  | 32      | 327 90  | 44.6           | 32.1       | 62.9  |
| POOLED       |                             | 4,40E+06 (17166) | 1,37E+06 ( 5347)            |        | 4696    | 225 8   | 61.7           | 58.7       | 64.8  |

CHI<sup>2</sup> PROBABILITY (%): 0.0

|                |                         |       |         |             |       |
|----------------|-------------------------|-------|---------|-------------|-------|
| POOLED AGE W/  | 68% CONF. INTERVAL(Ma): | 61.7, | 60.1 -- | 63.2 ( -1.5 | +1.6) |
|                | 95% CONF. INTERVAL(Ma): |       | 58.7 -- | 64.8 ( -3.0 | +3.1) |
| CENTRAL AGE W/ | 68% CONF. INTERVAL(Ma): | 65.6, | 62.4 -- | 69.0 ( -3.2 | +3.4) |
|                | 95% CONF. INTERVAL(Ma): |       | 59.5 -- | 72.4 ( -6.2 | +6.8) |
|                | AGE DISPERSION (%):     | 41.2  |         |             |       |

Merged dataset:

C:\BH2\Edna\6-2015\AP-050\AP\_050-2A.FTZ

C:\BH2\Edna\6-2015\AP-050\AP\_050-1.ftz

FIT OPTION: Best-fit peaks using the binomial model of Galbraith and Green

**INITIAL GUESS FOR MODEL PARAMETERS (number of peaks to fit = 4)**

| Peak #. | Peak Age | Theta | Fraction(%) | Count |
|---------|----------|-------|-------------|-------|
| 1.      | 36.60    | 0.655 | 17.4        | 16.17 |
| 2.      | 48.90    | 0.718 | 41.5        | 38.57 |
| 3.      | 61.70    | 0.762 | 32.4        | 30.10 |
| 4.      | 361.60   | 0.951 | 1.3         | 1.21  |

Total range for grain ages: 26,0 to 361,6 Ma  
 Number of active grains (Num. used for fit): 93  
 Number of removed grains: 0  
 Degrees of freedom for fit: 86  
 Average of the SE(Z)'s for the grains: 0,21  
 Estimated width of peaks in PD plot in Z units: 0,24

**PARAMETERS FOR BEST-FIT PEAKS**

\* Standard error for peak age includes group error

\* Peak width is for PD plot assuming a kernel factor = 0.60

| #. | Peak Age(Ma) | 68%CI          | 95%CI          | W(Z) | Frac(%) | SE, % | Count |
|----|--------------|----------------|----------------|------|---------|-------|-------|
| 1. | 38.9         | -2,2 ...+2,3   | -4,2 ...+4,7   | 0.15 | 14.6    | 5.5   | 13.6  |
| 2. | 54.8         | -1,8 ...+1,9   | -3,5 ...+3,8   | 0.16 | 47.3    | 6.9   | 44.0  |
| 3. | 94.0         | -7,2 ...+7,7   | -13,5 ...+15,8 | 0.22 | 20.1    | 6.4   | 18.7  |
| 4. | 154.8        | -13,5 ...+14,7 | -25,3 ...+30,1 | 0.29 | 18.0    | 6.2   | 16.7  |

Log-likelihood for best fit: -380,676  
 Chi-squared value for best fit: 93,978  
 Reduced chi-squared value: 1,093  
 Probability for F test: 0%  
 Condition number for COVAR matrix: 20,75  
 Number of iterations: 14

Merged dataset:

C:\BH2\Edna\6-2015\AP-050\AP\_050-2A.FTZ

C:\BH2\Edna\6-2015\AP-050\AP\_050-1.ftz

### Plot of Grain Ages (Unsorted)

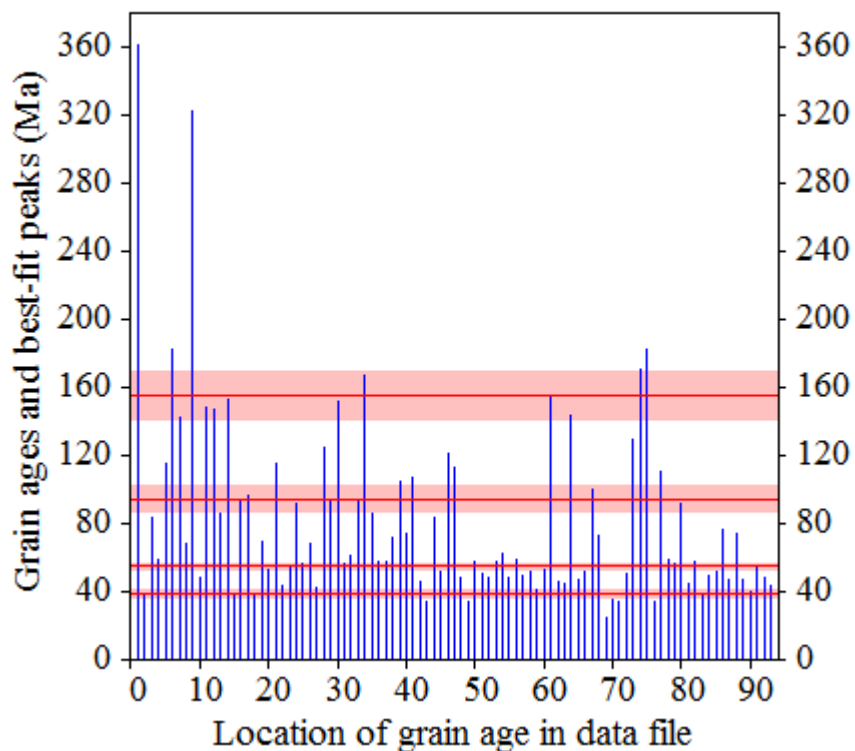

### Probability-Density Plot with Best-Fit Peaks

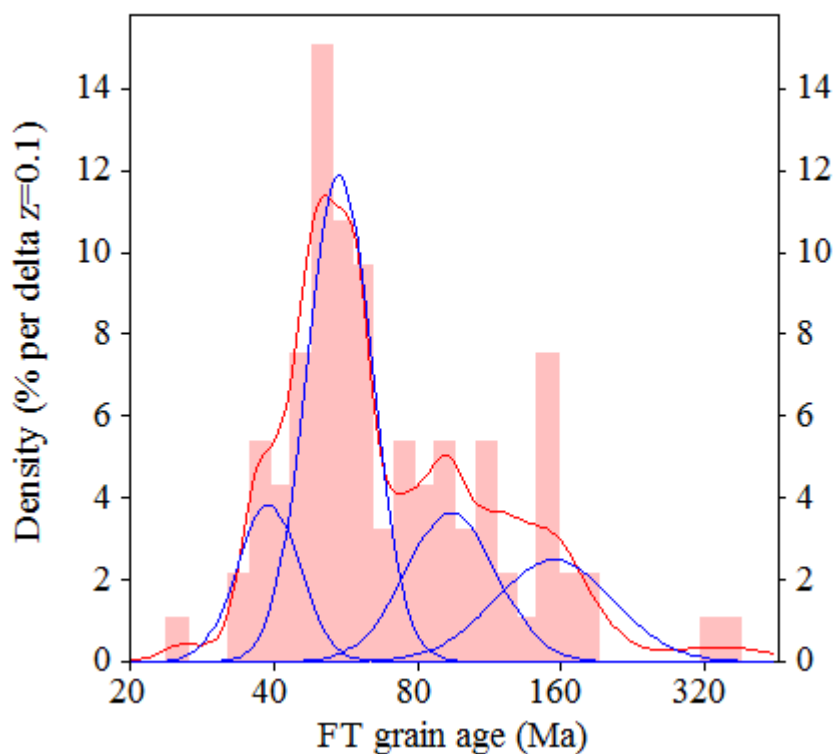

Merged dataset:

C:\BH2\Edna\6-2015\AP-050\AP\_050-2A.FTZ

C:\BH2\Edna\6-2015\AP-050\AP\_050-1.ftz

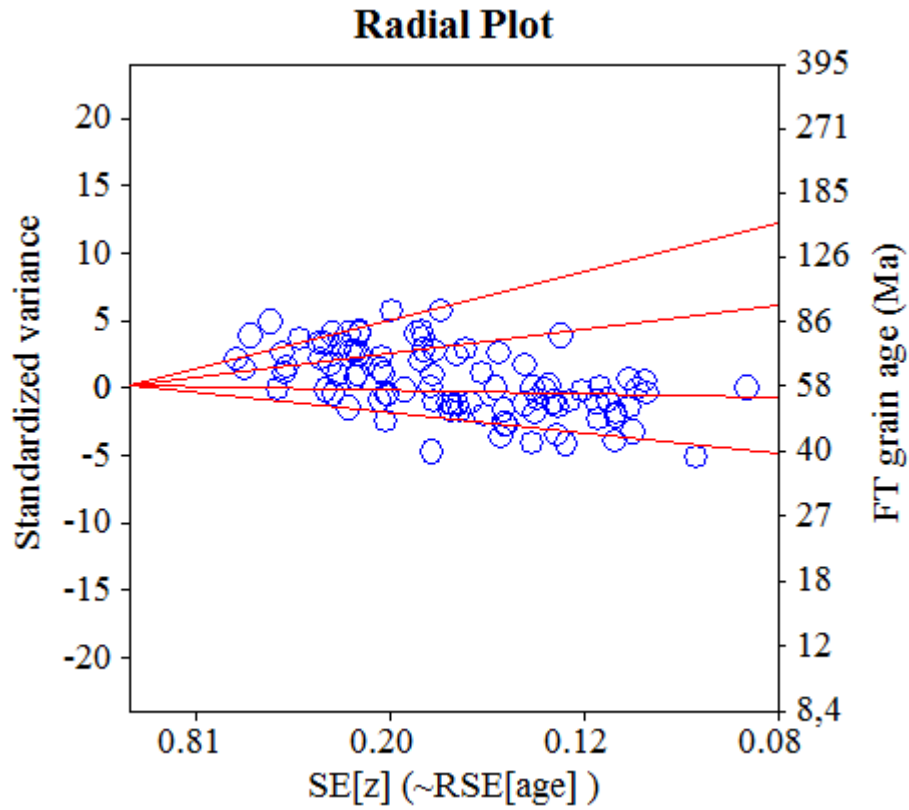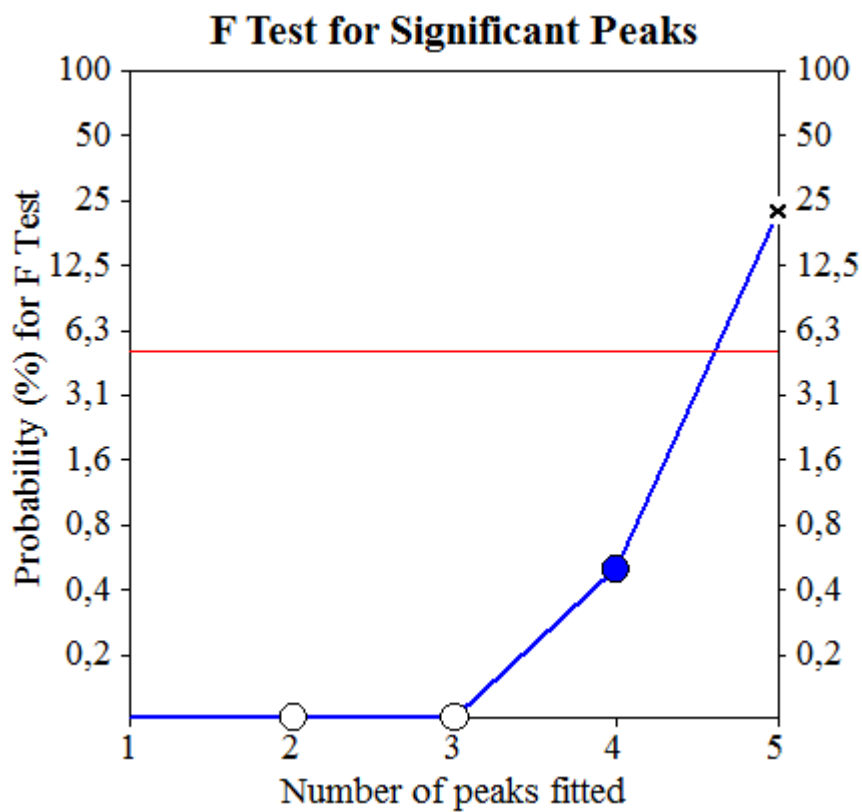

Datafile: C:\BH2\Edna\12-2015\AP-045\AP\_45\_12\_2015-19.ftz

Title: Sample No. AP-45 Irr 12-2015-19

**NEW PARAMETERS - ZETA METHOD**EFFECTIVE TRACK DENSITY FOR FLUENCE MONITOR (tracks/cm<sup>2</sup>): 2,74E+05

RELATIVE ERROR (%): 1,20

EFFECTIVE URANIUM CONTENT OF MONITOR (ppm): 50,00

ZETA FACTOR AND STANDARD ERROR (yr cm<sup>2</sup>): 128,02 1,87SIZE OF COUNTER SQUARE (cm<sup>2</sup>): 8,30E-07**GRAIN AGES IN ORIGINAL ORDER**

| Grain<br>no. | RhoS<br>(cm <sup>-2</sup> ) | (Ns)   | RhoI<br>(cm <sup>-2</sup> ) | (Ni)  | Squares | U+/-2s  | Grain Age (Ma) |            |       |
|--------------|-----------------------------|--------|-----------------------------|-------|---------|---------|----------------|------------|-------|
|              |                             |        |                             |       |         |         | Age            | --95% CI-- |       |
| 1            | 7,95E+05                    | ( 66)  | 1,08E+05                    | ( 9)  | 100     | 20 13   | 125.2          | 63.3       | 286.7 |
| 2            | 3,71E+06                    | ( 148) | 5,77E+05                    | ( 23) | 48      | 106 44  | 111.0          | 71.8       | 180.8 |
| 3            | 3,49E+06                    | ( 87)  | 3,21E+05                    | ( 8)  | 30      | 59 40   | 184.3          | 91.8       | 439.7 |
| 4            | 2,09E+06                    | ( 97)  | 3,44E+05                    | ( 16) | 56      | 63 31   | 104.4          | 61.8       | 190.3 |
| 5            | 2,23E+06                    | ( 185) | 3,01E+05                    | ( 25) | 100     | 55 22   | 127.5          | 84.4       | 202.3 |
| 6            | 4,43E+06                    | ( 92)  | 4,34E+05                    | ( 9)  | 25      | 79 51   | 173.7          | 89.6       | 391.7 |
| 7            | 3,22E+06                    | ( 267) | 3,86E+05                    | ( 32) | 100     | 70 25   | 143.8          | 100.1      | 214.5 |
| 8            | 1,36E+06                    | ( 113) | 2,29E+05                    | ( 19) | 100     | 42 19   | 102.5          | 63.3       | 177.0 |
| 9            | 9,29E+05                    | ( 27)  | 2,07E+05                    | ( 6)  | 35      | 38 30   | 76.7           | 31.8       | 229.3 |
| 10           | 1,31E+06                    | ( 109) | 1,45E+05                    | ( 12) | 100     | 26 15   | 155.2          | 86.8       | 309.8 |
| 11           | 4,19E+06                    | ( 87)  | 9,64E+05                    | ( 20) | 25      | 176 78  | 75.2           | 46.2       | 129.5 |
| 12           | 4,60E+06                    | ( 191) | 5,30E+05                    | ( 22) | 50      | 97 41   | 149.2          | 96.7       | 243.8 |
| 13           | 5,07E+06                    | ( 202) | 1,15E+06                    | ( 46) | 48      | 211 62  | 76.2           | 55.3       | 107.5 |
| 14           | 2,75E+06                    | ( 137) | 5,02E+05                    | ( 25) | 60      | 92 36   | 94.7           | 62.0       | 151.7 |
| 15           | 2,80E+06                    | ( 232) | 4,22E+05                    | ( 35) | 100     | 77 26   | 114.6          | 80.5       | 168.6 |
| 16           | 1,05E+06                    | ( 87)  | 8,43E+04                    | ( 7)  | 100     | 15 11   | 209.6          | 100.4      | 534.6 |
| 17           | 1,13E+06                    | ( 94)  | 1,45E+05                    | ( 12) | 100     | 26 15   | 134.1          | 74.4       | 269.3 |
| 18           | 2,24E+06                    | ( 67)  | 2,68E+05                    | ( 8)  | 36      | 49 34   | 142.4          | 69.9       | 344.2 |
| 19           | 3,81E+06                    | ( 316) | 5,06E+05                    | ( 42) | 100     | 93 28   | 129.9          | 94.5       | 183.9 |
| 20           | 2,97E+06                    | ( 74)  | 2,81E+05                    | ( 7)  | 30      | 51 38   | 178.7          | 84.9       | 459.6 |
| 21           | 5,22E+06                    | ( 52)  | 9,04E+05                    | ( 9)  | 12      | 165 107 | 98.9           | 49.2       | 229.4 |
| 22           | 2,77E+06                    | ( 92)  | 3,61E+05                    | ( 12) | 40      | 66 37   | 131.3          | 72.8       | 263.8 |
| 23           | 4,18E+06                    | ( 104) | 7,23E+05                    | ( 18) | 30      | 132 62  | 99.6           | 60.6       | 175.0 |
| 24           | 2,01E+06                    | ( 100) | 1,81E+05                    | ( 9)  | 60      | 33 21   | 188.6          | 97.7       | 423.7 |
| 25           | 2,74E+06                    | ( 205) | 3,21E+05                    | ( 24) | 90      | 59 24   | 146.9          | 96.9       | 234.6 |
| 26           | 3,06E+06                    | ( 203) | 7,08E+05                    | ( 47) | 80      | 129 38  | 75.0           | 54.5       | 105.4 |
| 27           | 6,36E+06                    | ( 132) | 1,06E+06                    | ( 22) | 25      | 194 82  | 103.5          | 66.2       | 171.1 |
| 28           | 3,94E+06                    | ( 327) | 6,14E+05                    | ( 51) | 100     | 112 31  | 111.0          | 82.7       | 152.2 |
| 29           | 4,56E+06                    | ( 227) | 5,02E+05                    | ( 25) | 60      | 92 36   | 156.1          | 104.0      | 246.2 |
| 30           | 2,18E+06                    | ( 152) | 5,88E+05                    | ( 41) | 84      | 108 33  | 64.4           | 45.5       | 93.4  |
| 31           | 9,11E+06                    | ( 121) | 1,66E+06                    | ( 22) | 16      | 303 128 | 95.0           | 60.5       | 157.5 |
| 32           | 3,92E+06                    | ( 130) | 2,41E+05                    | ( 8)  | 40      | 44 30   | 273.2          | 138.6      | 640.2 |
| 33           | 3,78E+06                    | ( 314) | 4,94E+05                    | ( 41) | 100     | 90 28   | 132.2          | 95.8       | 187.9 |
| 34           | 1,83E+06                    | ( 152) | 1,93E+05                    | ( 16) | 100     | 35 17   | 162.7          | 98.3       | 291.8 |
| 35           | 9,64E+05                    | ( 80)  | 9,64E+04                    | ( 8)  | 100     | 18 12   | 169.6          | 84.1       | 406.5 |
| 36           | 2,37E+06                    | ( 197) | 2,05E+05                    | ( 17) | 100     | 37 18   | 198.0          | 122.3      | 346.0 |
| 37           | 4,47E+06                    | ( 371) | 5,54E+05                    | ( 46) | 100     | 101 30  | 139.2          | 102.8      | 193.5 |
| 38           | 2,09E+06                    | ( 111) | 4,89E+05                    | ( 26) | 64      | 89 35   | 74.0           | 48.2       | 118.4 |
| 39           | 1,98E+06                    | ( 164) | 2,41E+05                    | ( 20) | 100     | 44 19   | 141.0          | 89.3       | 236.9 |
| 40           | 2,68E+06                    | ( 80)  | 4,69E+05                    | ( 14) | 36      | 86 45   | 98.3           | 56.0       | 188.5 |
| 41           | 7,63E+06                    | ( 95)  | 1,12E+06                    | ( 14) | 15      | 206 108 | 116.6          | 67.0       | 221.8 |
| 42           | 3,86E+06                    | ( 96)  | 7,63E+05                    | ( 19) | 30      | 139 63  | 87.2           | 53.4       | 151.6 |
| 43           | 3,11E+06                    | ( 258) | 6,75E+05                    | ( 56) | 100     | 123 33  | 79.5           | 59.5       | 106.0 |
| 44           | 6,21E+05                    | ( 33)  | 5,65E+04                    | ( 3)  | 64      | 10 11   | 181.2          | 60.1       | 913.6 |
| 45           | 1,55E+06                    | ( 129) | 2,89E+05                    | ( 24) | 100     | 53 21   | 92.9           | 60.2       | 150.5 |
| 46           | 1,99E+06                    | ( 165) | 2,89E+05                    | ( 24) | 100     | 53 21   | 118.6          | 77.6       | 190.5 |
| 47           | 2,60E+06                    | ( 216) | 5,42E+05                    | ( 45) | 100     | 99 29   | 83.2           | 60.4       | 117.6 |
| 48           | 3,29E+06                    | ( 134) | 2,21E+05                    | ( 9)  | 49      | 40 26   | 251.3          | 131.8      | 557.8 |
| 49           | 1,80E+06                    | ( 149) | 3,98E+05                    | ( 33) | 100     | 73 25   | 78.3           | 53.6       | 118.0 |
| 50           | 3,52E+06                    | ( 146) | 7,95E+05                    | ( 33) | 50      | 145 50  | 76.7           | 52.5       | 115.8 |
| 51           | 7,57E+06                    | ( 157) | 1,35E+06                    | ( 28) | 25      | 247 93  | 97.0           | 65.0       | 150.8 |
| 52           | 4,24E+06                    | ( 88)  | 1,06E+06                    | ( 22) | 25      | 194 82  | 69.3           | 43.3       | 116.4 |
| 53           | 5,28E+06                    | ( 438) | 1,01E+06                    | ( 84) | 100     | 185 40  | 90.1           | 71.3       | 113.9 |

Datafile: C:\BH2\Edna\12-2015\AP-045\AP\_45\_12\_2015-19.ftz

Title: Sample No. AP-45 Irr 12-2015-19

| Grain<br>no. | RhoS<br>(cm <sup>-2</sup> ) | (Ns)            | RhoI<br>(cm <sup>-2</sup> ) | (Ni)  | Squares | U+/-2s  | Grain Age (Ma) |            |        |
|--------------|-----------------------------|-----------------|-----------------------------|-------|---------|---------|----------------|------------|--------|
|              |                             |                 |                             |       |         |         | Age            | --95% CI-- |        |
| 54           | 6,84E+06                    | ( 142)          | 1,20E+06                    | ( 25) | 25      | 220 87  | 98.1           | 64.3       | 157.0  |
| 55           | 2,43E+06                    | ( 202)          | 3,98E+05                    | ( 33) | 100     | 73 25   | 105.8          | 73.4       | 158.1  |
| 56           | 1,95E+06                    | ( 162)          | 3,01E+05                    | ( 25) | 100     | 55 22   | 111.8          | 73.7       | 178.1  |
| 57           | 2,25E+06                    | ( 56)           | 2,41E+05                    | ( 6)  | 30      | 44 35   | 157.6          | 70.1       | 448.3  |
| 58           | 4,26E+06                    | ( 99)           | 6,02E+05                    | ( 14) | 28      | 110 58  | 121.4          | 70.0       | 230.6  |
| 59           | 4,59E+06                    | ( 137)          | 1,94E+06                    | ( 58) | 36      | 355 93  | 41.2           | 30.1       | 57.0   |
| 60           | 3,94E+06                    | ( 229)          | 9,98E+05                    | ( 58) | 70      | 183 48  | 68.2           | 51.1       | 90.9   |
| 61           | 3,42E+06                    | ( 284)          | 4,46E+05                    | ( 37) | 100     | 81 27   | 132.5          | 94.4       | 192.0  |
| 62           | 4,85E+06                    | ( 322)          | 1,02E+06                    | ( 68) | 80      | 187 45  | 81.8           | 62.9       | 106.2  |
| 63           | 1,10E+06                    | ( 91)           | 1,33E+05                    | ( 11) | 100     | 24 14   | 141.4          | 76.7       | 293.7  |
| 64           | 2,46E+06                    | ( 204)          | 3,86E+05                    | ( 32) | 100     | 70 25   | 110.2          | 76.1       | 165.5  |
| 65           | 2,91E+06                    | ( 145)          | 5,02E+05                    | ( 25) | 60      | 92 36   | 100.2          | 65.7       | 160.2  |
| 66           | 1,93E+06                    | ( 160)          | 3,49E+05                    | ( 29) | 100     | 64 24   | 95.4           | 64.4       | 147.3  |
| 67           | 4,26E+06                    | ( 212)          | 6,02E+05                    | ( 30) | 60      | 110 40  | 122.0          | 83.5       | 185.3  |
| 68           | 3,33E+06                    | ( 276)          | 6,75E+05                    | ( 56) | 100     | 123 33  | 85.0           | 63.8       | 113.1  |
| 69           | 4,54E+06                    | ( 377)          | 4,58E+05                    | ( 38) | 100     | 84 27   | 170.7          | 122.9      | 244.8  |
| 70           | 7,33E+06                    | ( 219)          | 9,71E+05                    | ( 29) | 36      | 177 65  | 130.2          | 88.8       | 199.1  |
| 71           | 4,58E+06                    | ( 380)          | 5,30E+05                    | ( 44) | 100     | 97 29   | 149.0          | 109.4      | 208.4  |
| 72           | 2,95E+06                    | ( 88)           | 4,02E+05                    | ( 12) | 36      | 73 42   | 125.6          | 69.5       | 253.0  |
| 73           | 1,77E+06                    | ( 88)           | 3,01E+05                    | ( 15) | 60      | 55 28   | 101.0          | 58.7       | 188.6  |
| 74           | 5,45E+06                    | ( 226)          | 8,43E+05                    | ( 35) | 50      | 154 52  | 111.6          | 78.4       | 164.4  |
| 75           | 3,73E+06                    | ( 310)          | 7,35E+05                    | ( 61) | 100     | 134 34  | 87.7           | 66.6       | 115.3  |
| 76           | 3,69E+06                    | ( 230)          | 4,66E+05                    | ( 29) | 75      | 85 31   | 136.7          | 93.4       | 208.7  |
| 77           | 6,52E+06                    | ( 379)          | 1,22E+06                    | ( 71) | 70      | 223 53  | 92.1           | 71.5       | 118.7  |
| 78           | 2,43E+06                    | ( 97)           | 4,02E+05                    | ( 16) | 48      | 73 36   | 104.4          | 61.8       | 190.3  |
| 79           | 4,92E+06                    | ( 204)          | 7,47E+05                    | ( 31) | 50      | 137 49  | 113.7          | 78.1       | 171.8  |
| 80           | 3,86E+06                    | ( 192)          | 4,42E+05                    | ( 22) | 60      | 81 34   | 150.0          | 97.2       | 245.0  |
| 81           | 1,27E+06                    | ( 21)           | 6,63E+05                    | ( 11) | 20      | 121 72  | 33.1           | 15.4       | 76.3   |
| 82           | 4,10E+06                    | ( 340)          | 5,06E+05                    | ( 42) | 100     | 93 28   | 139.7          | 101.7      | 197.4  |
| 83           | 1,54E+06                    | ( 51)           | 3,31E+05                    | ( 11) | 40      | 61 36   | 79.7           | 41.6       | 170.5  |
| 84           | 4,64E+06                    | ( 385)          | 8,07E+05                    | ( 67) | 100     | 148 36  | 99.1           | 76.5       | 128.4  |
| 85           | 8,31E+06                    | ( 69)           | 9,64E+05                    | ( 8)  | 10      | 176 121 | 146.6          | 72.1       | 353.8  |
| 86           | 2,57E+06                    | ( 213)          | 5,66E+05                    | ( 47) | 100     | 104 30  | 78.6           | 57.3       | 110.4  |
| 87           | 3,71E+06                    | ( 154)          | 5,54E+05                    | ( 23) | 50      | 101 42  | 115.5          | 74.8       | 187.8  |
| 88           | 2,67E+06                    | ( 222)          | 3,49E+05                    | ( 29) | 100     | 64 24   | 132.0          | 90.0       | 201.7  |
| 89           | 4,47E+06                    | ( 297)          | 7,38E+05                    | ( 49) | 80      | 135 38  | 105.0          | 77.7       | 145.1  |
| 90           | 2,92E+06                    | ( 242)          | 3,61E+05                    | ( 30) | 100     | 66 24   | 139.0          | 95.6       | 210.5  |
| 91           | 1,66E+06                    | ( 138)          | 2,65E+05                    | ( 22) | 100     | 48 20   | 108.2          | 69.3       | 178.5  |
| 92           | 3,69E+06                    | ( 306)          | 5,42E+05                    | ( 45) | 100     | 99 29   | 117.6          | 86.2       | 164.7  |
| 93           | 2,79E+06                    | ( 139)          | 7,43E+05                    | ( 37) | 60      | 136 44  | 65.2           | 45.3       | 96.6   |
| 94           | 1,74E+06                    | ( 52)           | 4,02E+05                    | ( 12) | 36      | 73 42   | 74.6           | 39.8       | 154.3  |
| 95           | 5,85E+06                    | ( 238)          | 8,61E+05                    | ( 35) | 49      | 157 53  | 117.5          | 82.6       | 172.8  |
| 96           | 2,98E+06                    | ( 247)          | 3,37E+05                    | ( 28) | 100     | 62 23   | 151.8          | 103.3      | 233.1  |
| 97           | 4,62E+06                    | ( 230)          | 8,23E+05                    | ( 41) | 60      | 151 47  | 97.1           | 69.8       | 139.1  |
| 98           | 4,28E+06                    | ( 213)          | 4,62E+05                    | ( 23) | 60      | 84 35   | 159.1          | 104.3      | 256.3  |
| 99           | 2,00E+06                    | ( 166)          | 3,49E+05                    | ( 29) | 100     | 64 24   | 99.0           | 66.8       | 152.6  |
| 100          | 1,88E+06                    | ( 156)          | 3,13E+05                    | ( 26) | 100     | 57 22   | 103.6          | 68.6       | 163.8  |
| 101          | 6,02E+06                    | ( 45)           | 4,02E+05                    | ( 3)  | 9       | 73 79   | 245.5          | 83.7       | 1201.9 |
| POOLED       |                             | 3,07E+06(17531) | 4,87E+05( 2781)             |       | 6886    | 89 4    | 109.4          | 103.6      | 115.5  |

CHI^2 PROBABILITY (%): 0.0

POOLED AGE W/ 68% CONF. INTERVAL(Ma): 109.4, 106.4 -- 112.5 ( -3.0 +3.1)  
95% CONF. INTERVAL(Ma): 103.6 -- 115.5 ( -5.8 +6.1)

CENTRAL AGE W/ 68% CONF. INTERVAL(Ma): 109.7, 105.7 -- 113.8 ( -4.0 +4.1)  
95% CONF. INTERVAL(Ma): 102.1 -- 117.9 ( -7.6 +8.2)  
AGE DISPERSION (%): 23.4



*FIT OPTION: Best-fit peaks using the binomial model of Galbraith and Green*

**INITIAL GUESS FOR MODEL PARAMETERS (number of peaks to fit = 3)**

| Peak #. | Peak Age | Theta | Fraction(%) | Count |
|---------|----------|-------|-------------|-------|
| 1.      | 40.90    | 0.701 | 2.0         | 2.06  |
| 2.      | 109.40   | 0.863 | 43.1        | 43.56 |
| 3.      | 263.30   | 0.939 | 2.9         | 2.96  |

Total range for grain ages: 32,6 to 263,3 Ma  
 Number of active grains (Num. used for fit): 101  
 Number of removed grains: 0  
 Degrees of freedom for fit: 96  
 Average of the SE(Z)'s for the grains: 0,25  
 Estimated width of peaks in PD plot in Z units: 0,29

**PARAMETERS FOR BEST-FIT PEAKS**

\* Standard error for peak age includes group error

\* Peak width is for PD plot assuming a kernel factor = 0.60

| #. | Peak Age(Ma) | 68%CI        | 95%CI          | W(Z) | Frac(%) | SE,% | Count |
|----|--------------|--------------|----------------|------|---------|------|-------|
| 1. | 41.0         | -6,1 ...+7,1 | -11,0 ...+15,1 | 0.21 | 1.4     | 1.3  | 1.4   |
| 2. | 89.6         | -4,7 ...+4,9 | -8,9 ...+9,9   | 0.22 | 38.6    | 10.2 | 39.0  |
| 3. | 131.6        | -5,8 ...+6,0 | -11,1 ...+12,1 | 0.26 | 60.0    | 10.2 | 60.6  |

Log-likelihood for best fit: -326,691  
 Chi-squared value for best fit: 98,578  
 Reduced chi-squared value: 1,027  
 Probability for F test: 0%  
 Condition number for COVAR matrix: 152,47  
 Number of iterations: 34

### Plot of Grain Ages (Unsorted)

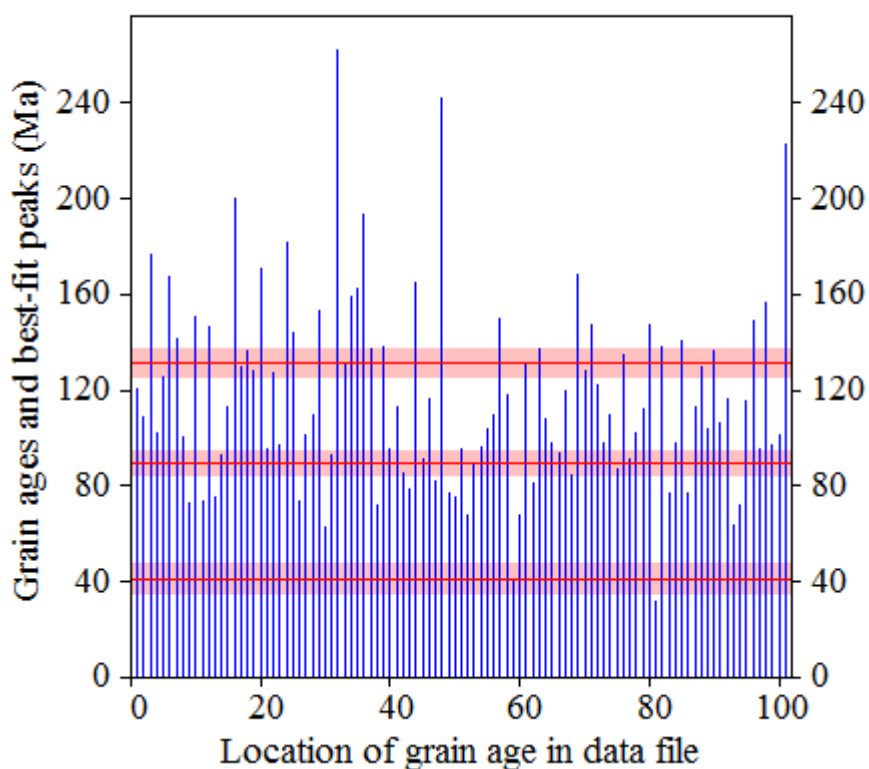

### Probability-Density Plot with Best-Fit Peaks

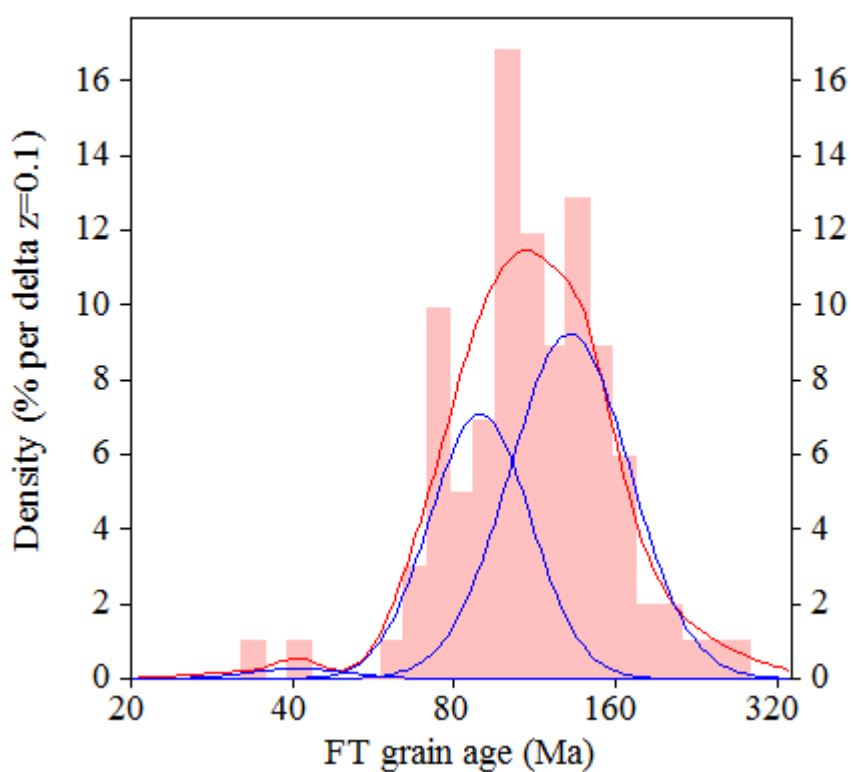

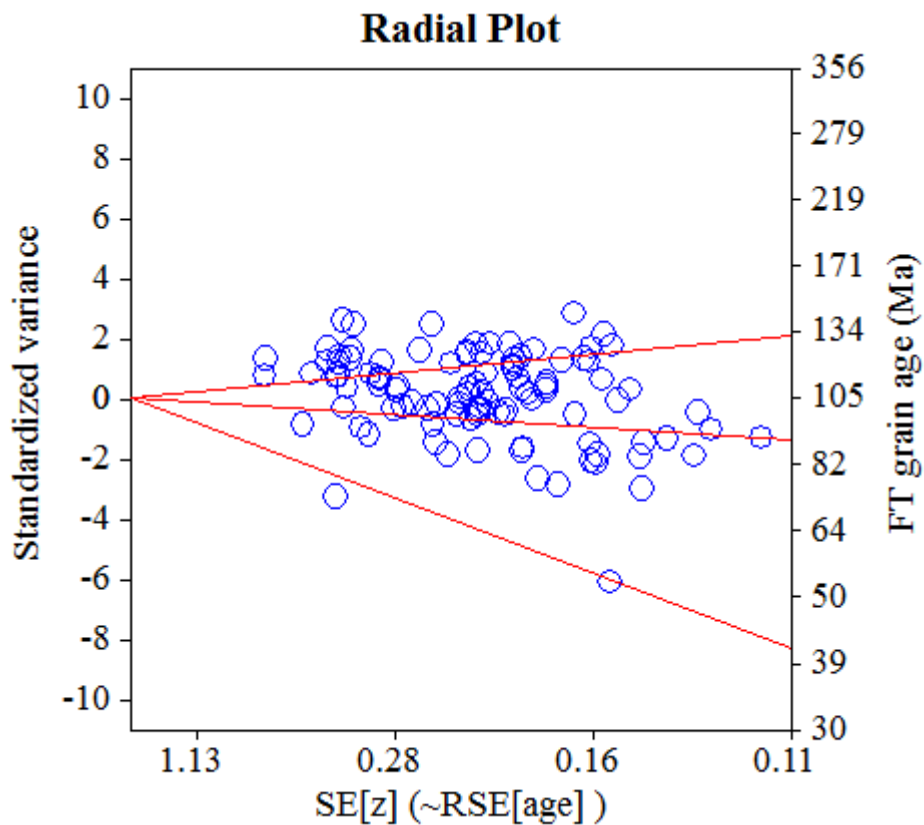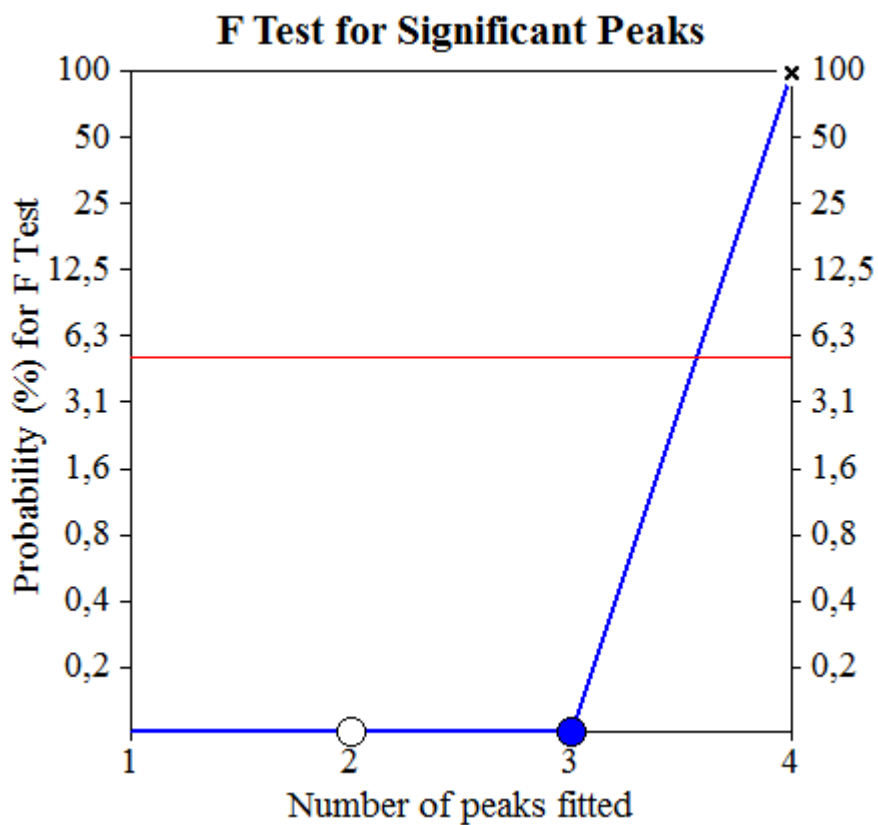

Datafile: C:\BH2\Alejandro\6-2015\_zircon\CP\_088b\CP\_088b.ftz

Title: Sample No. CP-088b Irr 6-2015-30

**NEW PARAMETERS - ZETA METHOD**EFFECTIVE TRACK DENSITY FOR FLUENCE MONITOR (tracks/cm<sup>2</sup>): 3,10E+05

RELATIVE ERROR (%): 1,12

EFFECTIVE URANIUM CONTENT OF MONITOR (ppm): 50,00

ZETA FACTOR AND STANDARD ERROR (yr cm<sup>2</sup>): 141,03 2,32SIZE OF COUNTER SQUARE (cm<sup>2</sup>): 8,30E-07**GRAIN AGES IN ORIGINAL ORDER**

| Grain<br>no. | RhoS<br>(cm <sup>-2</sup> ) | (Ns)   | RhoI<br>(cm <sup>-2</sup> ) | (Ni)   | Squares | U+/-2s  | Grain Age (Ma) |            |       |
|--------------|-----------------------------|--------|-----------------------------|--------|---------|---------|----------------|------------|-------|
|              |                             |        |                             |        |         |         | Age            | --95% CI-- |       |
| 1            | 7,72E+06                    | ( 205) | 2,37E+06                    | ( 63)  | 32      | 383 97  | 70.1           | 52.8       | 93.0  |
| 2            | 6,31E+06                    | ( 110) | 2,24E+06                    | ( 39)  | 21      | 361 115 | 61.1           | 42.2       | 90.6  |
| 3            | 1,02E+07                    | ( 676) | 2,00E+06                    | ( 133) | 80      | 324 56  | 109.6          | 90.8       | 132.2 |
| 4            | 5,75E+06                    | ( 229) | 2,54E+06                    | ( 101) | 48      | 410 82  | 49.1           | 38.7       | 62.1  |
| 5            | 6,10E+06                    | ( 253) | 1,78E+06                    | ( 74)  | 50      | 288 67  | 73.7           | 56.8       | 95.5  |
| 6            | 7,73E+06                    | ( 77)  | 2,21E+06                    | ( 22)  | 12      | 357 151 | 75.5           | 46.8       | 127.7 |
| 7            | 5,61E+06                    | ( 466) | 1,18E+06                    | ( 98)  | 100     | 191 39  | 102.4          | 82.3       | 127.5 |
| 8            | 5,72E+06                    | ( 57)  | 1,10E+06                    | ( 11)  | 12      | 178 105 | 110.8          | 58.4       | 234.9 |
| 9            | 4,21E+06                    | ( 339) | 1,08E+06                    | ( 87)  | 97      | 175 38  | 84.0           | 66.3       | 106.4 |
| 10           | 6,53E+06                    | ( 65)  | 1,41E+06                    | ( 14)  | 12      | 227 119 | 99.6           | 56.0       | 192.7 |
| 11           | 4,63E+06                    | ( 384) | 1,37E+06                    | ( 114) | 100     | 222 42  | 72.8           | 58.9       | 89.9  |
| 12           | 6,43E+06                    | ( 48)  | 4,42E+06                    | ( 33)  | 9       | 714 247 | 31.6           | 19.9       | 50.9  |
| 13           | 1,69E+07                    | ( 126) | 3,75E+06                    | ( 28)  | 9       | 606 227 | 97.0           | 64.4       | 152.0 |
| 14           | 7,07E+06                    | ( 176) | 1,77E+06                    | ( 44)  | 30      | 285 86  | 86.5           | 62.1       | 123.3 |
| 15           | 8,97E+06                    | ( 521) | 4,06E+06                    | ( 236) | 70      | 656 87  | 47.9           | 40.9       | 56.1  |
| 16           | 9,04E+06                    | ( 225) | 2,37E+06                    | ( 59)  | 30      | 383 100 | 82.0           | 61.6       | 109.2 |
| 17           | 8,67E+06                    | ( 180) | 1,59E+06                    | ( 33)  | 25      | 257 89  | 117.5          | 81.2       | 175.9 |
| 18           | 7,19E+06                    | ( 179) | 1,24E+06                    | ( 31)  | 30      | 201 72  | 124.3          | 85.1       | 188.3 |
| 19           | 8,35E+06                    | ( 104) | 1,12E+06                    | ( 14)  | 15      | 182 96  | 158.5          | 91.7       | 299.9 |
| 20           | 1,32E+07                    | ( 219) | 4,40E+06                    | ( 73)  | 20      | 710 166 | 64.7           | 49.6       | 84.4  |
| 21           | 5,69E+06                    | ( 236) | 1,18E+06                    | ( 49)  | 50      | 191 54  | 104.0          | 76.5       | 144.6 |
| 22           | 7,49E+06                    | ( 261) | 1,86E+06                    | ( 65)  | 42      | 301 75  | 86.4           | 65.8       | 113.4 |
| 23           | 5,34E+06                    | ( 124) | 1,12E+06                    | ( 26)  | 28      | 181 70  | 102.7          | 67.4       | 163.6 |
| 24           | 4,73E+06                    | ( 393) | 1,06E+06                    | ( 88)  | 100     | 171 37  | 96.2           | 76.3       | 121.3 |
| 25           | 9,37E+06                    | ( 389) | 3,23E+06                    | ( 134) | 50      | 522 91  | 62.8           | 51.5       | 76.6  |
| 26           | 8,19E+06                    | ( 340) | 2,63E+06                    | ( 109) | 50      | 424 82  | 67.4           | 54.2       | 83.8  |
| 27           | 1,65E+06                    | ( 41)  | 2,01E+05                    | ( 5)   | 30      | 32 28   | 171.7          | 70.4       | 555.8 |
| 28           | 4,53E+06                    | ( 376) | 9,28E+05                    | ( 77)  | 100     | 150 34  | 105.0          | 82.1       | 134.2 |
| 29           | 6,37E+06                    | ( 148) | 1,42E+06                    | ( 33)  | 28      | 229 79  | 96.8           | 66.4       | 145.9 |
| 30           | 5,22E+06                    | ( 303) | 1,48E+06                    | ( 86)  | 70      | 239 52  | 76.0           | 59.7       | 96.7  |
| 31           | 6,39E+06                    | ( 371) | 1,41E+06                    | ( 82)  | 70      | 228 50  | 97.4           | 76.6       | 123.8 |
| 32           | 6,99E+06                    | ( 58)  | 3,49E+06                    | ( 29)  | 10      | 564 208 | 43.4           | 27.4       | 70.4  |
| 33           | 5,35E+06                    | ( 311) | 1,67E+06                    | ( 97)  | 70      | 270 55  | 69.3           | 55.0       | 87.1  |
| 34           | 6,39E+06                    | ( 191) | 1,10E+06                    | ( 33)  | 36      | 178 62  | 124.6          | 86.3       | 186.2 |
| 35           | 4,54E+06                    | ( 264) | 1,02E+06                    | ( 59)  | 70      | 164 43  | 96.1           | 72.5       | 127.4 |
| 36           | 7,59E+06                    | ( 126) | 2,35E+06                    | ( 39)  | 20      | 380 121 | 69.9           | 48.7       | 103.0 |
| 37           | 9,64E+06                    | ( 200) | 2,46E+06                    | ( 51)  | 25      | 397 111 | 84.8           | 62.3       | 117.8 |
| 38           | 7,90E+06                    | ( 236) | 1,37E+06                    | ( 41)  | 36      | 222 69  | 124.0          | 89.2       | 177.3 |
| 39           | 6,31E+06                    | ( 220) | 1,66E+06                    | ( 58)  | 42      | 269 71  | 81.6           | 61.1       | 108.9 |
| 40           | 4,40E+06                    | ( 219) | 1,02E+06                    | ( 51)  | 60      | 165 46  | 92.8           | 68.4       | 128.6 |
| 41           | 4,37E+06                    | ( 58)  | 1,13E+06                    | ( 15)  | 16      | 182 93  | 83.2           | 47.0       | 158.4 |
| 42           | 6,12E+06                    | ( 61)  | 2,81E+06                    | ( 28)  | 12      | 454 170 | 47.2           | 29.8       | 76.8  |
| 43           | 6,59E+06                    | ( 164) | 1,49E+06                    | ( 37)  | 30      | 240 79  | 95.7           | 67.0       | 140.8 |
| 44           | 6,48E+06                    | ( 113) | 2,07E+06                    | ( 36)  | 21      | 334 111 | 67.9           | 46.5       | 101.9 |
| 45           | 3,01E+05                    | ( 25)  | 2,17E+05                    | ( 18)  | 100     | 35 16   | 30.2           | 15.9       | 58.7  |
| 46           | 2,92E+06                    | ( 242) | 6,75E+05                    | ( 56)  | 100     | 109 29  | 92.8           | 69.4       | 124.0 |
| 47           | 4,10E+06                    | ( 170) | 1,23E+06                    | ( 51)  | 50      | 199 56  | 72.2           | 52.7       | 100.8 |
| 48           | 4,87E+06                    | ( 101) | 1,64E+06                    | ( 34)  | 25      | 265 90  | 64.3           | 43.4       | 98.0  |
| 49           | 5,27E+06                    | ( 70)  | 1,43E+06                    | ( 19)  | 16      | 231 105 | 79.4           | 47.7       | 140.0 |
| 50           | 5,16E+06                    | ( 107) | 6,75E+05                    | ( 14)  | 25      | 109 57  | 163.0          | 94.4       | 308.1 |
| 51           | 5,72E+06                    | ( 285) | 1,91E+06                    | ( 95)  | 60      | 308 63  | 64.8           | 51.3       | 81.9  |
| 52           | 5,66E+06                    | ( 169) | 1,81E+06                    | ( 54)  | 36      | 292 79  | 67.8           | 49.8       | 94.0  |
| 53           | 8,39E+06                    | ( 174) | 2,46E+06                    | ( 51)  | 25      | 397 111 | 73.9           | 53.9       | 103.1 |

Datafile: C:\BH2\Alejandro\6-2015\_zircon\CP\_088b\CP\_088b.ftz

Title: Sample No. CP-088b Irr 6-2015-30

| Grain<br>no. | RhoS<br>(cm <sup>-2</sup> ) | (Ns)    | RhoI<br>(cm <sup>-2</sup> ) | (Ni)    | Squares | U+/-2s  | Grain Age (Ma) |            |       |
|--------------|-----------------------------|---------|-----------------------------|---------|---------|---------|----------------|------------|-------|
|              |                             |         |                             |         |         |         | Age            | --95% CI-- |       |
| 54           | 3,75E+06                    | ( 28)   | 2,54E+06                    | ( 19)   | 9       | 411 186 | 32.0           | 17.3       | 60.7  |
| 55           | 4,22E+06                    | ( 70)   | 1,02E+06                    | ( 17)   | 20      | 165 79  | 88.6           | 52.1       | 161.0 |
| 56           | 1,08E+06                    | ( 90)   | 2,41E+05                    | ( 20)   | 100     | 39 17   | 96.9           | 59.7       | 166.3 |
| 57           | 3,45E+06                    | ( 258)  | 9,91E+05                    | ( 74)   | 90      | 160 37  | 75.2           | 58.0       | 97.4  |
| 58           | 5,27E+06                    | ( 437)  | 1,17E+06                    | ( 97)   | 100     | 189 38  | 97.1           | 77.8       | 121.1 |
| 59           | 7,83E+06                    | ( 156)  | 1,61E+06                    | ( 32)   | 24      | 260 91  | 105.1          | 71.9       | 159.0 |
| 60           | 4,01E+06                    | ( 266)  | 1,36E+06                    | ( 90)   | 80      | 219 46  | 63.8           | 50.2       | 81.2  |
| 61           | 4,98E+06                    | ( 413)  | 1,57E+06                    | ( 130)  | 100     | 253 45  | 68.7           | 56.3       | 83.9  |
| 62           | 1,65E+06                    | ( 137)  | 4,58E+05                    | ( 38)   | 100     | 74 24   | 78.0           | 54.3       | 114.9 |
| 63           | 4,82E+06                    | ( 40)   | 1,81E+06                    | ( 15)   | 10      | 292 148 | 57.5           | 31.4       | 112.5 |
| 64           | 4,74E+06                    | ( 118)  | 9,64E+05                    | ( 24)   | 30      | 156 63  | 105.8          | 68.3       | 171.9 |
| 65           | 5,98E+06                    | ( 124)  | 9,64E+05                    | ( 20)   | 25      | 156 69  | 133.0          | 83.4       | 225.3 |
| 66           | 7,11E+06                    | ( 590)  | 1,11E+06                    | ( 92)   | 100     | 179 37  | 137.7          | 110.5      | 171.6 |
| 67           | 9,80E+06                    | ( 813)  | 1,64E+06                    | ( 136)  | 100     | 265 46  | 128.7          | 107.1      | 154.6 |
| 68           | 5,82E+06                    | ( 116)  | 1,36E+06                    | ( 27)   | 24      | 219 84  | 92.7           | 60.9       | 146.7 |
| 69           | 7,52E+06                    | ( 131)  | 2,01E+06                    | ( 35)   | 21      | 324 109 | 80.9           | 55.6       | 121.2 |
| 70           | 3,73E+06                    | ( 155)  | 1,11E+06                    | ( 46)   | 50      | 179 53  | 72.9           | 52.4       | 103.8 |
| 71           | 5,82E+06                    | ( 464)  | 1,23E+06                    | ( 98)   | 96      | 199 40  | 102.0          | 81.9       | 127.0 |
| 72           | 1,33E+06                    | ( 55)   | 2,65E+05                    | ( 11)   | 50      | 43 25   | 106.9          | 56.2       | 227.3 |
| 73           | 7,41E+06                    | ( 369)  | 1,87E+06                    | ( 93)   | 60      | 302 63  | 85.6           | 68.1       | 107.5 |
| 74           | 5,37E+06                    | ( 446)  | 1,13E+06                    | ( 94)   | 100     | 183 38  | 102.2          | 81.7       | 127.8 |
| 75           | 4,52E+06                    | ( 375)  | 9,76E+05                    | ( 81)   | 100     | 158 35  | 99.7           | 78.3       | 126.8 |
| 76           | 1,30E+06                    | ( 54)   | 2,41E+05                    | ( 10)   | 50      | 39 24   | 115.3          | 59.1       | 254.6 |
| 77           | 2,94E+06                    | ( 122)  | 5,30E+05                    | ( 22)   | 50      | 86 36   | 119.2          | 75.9       | 197.3 |
| 78           | 4,96E+06                    | ( 103)  | 1,73E+06                    | ( 36)   | 25      | 280 93  | 62.0           | 42.2       | 93.4  |
| 79           | 6,25E+06                    | ( 83)   | 2,33E+06                    | ( 31)   | 16      | 377 135 | 58.0           | 38.1       | 90.8  |
| 80           | 4,56E+06                    | ( 121)  | 1,69E+06                    | ( 45)   | 32      | 274 81  | 58.3           | 41.2       | 84.1  |
| 81           | 6,02E+06                    | ( 45)   | 1,20E+06                    | ( 9)    | 9       | 195 126 | 106.7          | 52.4       | 249.1 |
| 82           | 2,17E+06                    | ( 63)   | 3,10E+05                    | ( 9)    | 35      | 50 32   | 148.7          | 75.1       | 340.4 |
| 83           | 6,67E+06                    | ( 277)  | 1,04E+06                    | ( 43)   | 50      | 167 51  | 138.6          | 100.8      | 195.8 |
| 84           | 4,39E+06                    | ( 182)  | 5,54E+05                    | ( 23)   | 50      | 90 37   | 169.4          | 110.6      | 273.6 |
| 85           | 4,51E+06                    | ( 262)  | 1,26E+06                    | ( 73)   | 70      | 203 48  | 77.3           | 59.6       | 100.3 |
| 86           | 4,37E+06                    | ( 254)  | 9,64E+05                    | ( 56)   | 70      | 156 42  | 97.4           | 73.0       | 129.9 |
| 87           | 3,45E+06                    | ( 172)  | 8,63E+05                    | ( 43)   | 60      | 139 42  | 86.5           | 61.8       | 123.9 |
| 88           | 4,49E+06                    | ( 261)  | 2,05E+06                    | ( 119)  | 70      | 331 61  | 47.5           | 38.2       | 59.1  |
| 89           | 5,49E+06                    | ( 164)  | 2,04E+06                    | ( 61)   | 36      | 330 84  | 58.3           | 43.3       | 79.7  |
| 90           | 4,48E+06                    | ( 186)  | 6,02E+05                    | ( 25)   | 50      | 97 39   | 159.5          | 105.7      | 252.5 |
| 91           | 2,11E+06                    | ( 105)  | 5,02E+05                    | ( 25)   | 60      | 81 32   | 90.6           | 58.5       | 146.4 |
| 92           | 3,82E+06                    | ( 57)   | 7,36E+05                    | ( 11)   | 18      | 119 70  | 110.8          | 58.4       | 234.9 |
| 93           | 6,29E+06                    | ( 47)   | 1,61E+06                    | ( 12)   | 9       | 260 147 | 84.1           | 44.5       | 174.7 |
| 94           | 8,19E+06                    | ( 68)   | 1,33E+06                    | ( 11)   | 10      | 214 126 | 131.9          | 70.4       | 277.0 |
| 95           | 5,49E+06                    | ( 456)  | 1,36E+06                    | ( 113)  | 100     | 220 42  | 87.1           | 70.7       | 107.2 |
| 96           | 3,33E+06                    | ( 116)  | 3,44E+05                    | ( 12)   | 42      | 56 31   | 205.1          | 115.2      | 407.1 |
| <hr/>        |                             |         |                             |         |         |         |                |            |       |
| POOLED       | 5,24E+06                    | (20034) | 1,34E+06                    | ( 5105) | 4606    | 216 8   | 85.1           | 81.0       | 89.4  |

CHI^2 PROBABILITY (%): 0.0

|                |                         |       |         |                   |
|----------------|-------------------------|-------|---------|-------------------|
| POOLED AGE W/  | 68% CONF. INTERVAL(Ma): | 85.1, | 83.0 -- | 87.2 ( -2.1 +2.2) |
|                | 95% CONF. INTERVAL(Ma): |       | 81.0 -- | 89.4 ( -4.1 +4.3) |
| <br>           |                         |       |         |                   |
| CENTRAL AGE W/ | 68% CONF. INTERVAL(Ma): | 84.3, | 81.1 -- | 87.6 ( -3.2 +3.3) |
|                | 95% CONF. INTERVAL(Ma): |       | 78.2 -- | 90.9 ( -6.1 +6.6) |
|                | AGE DISPERSION (%):     | 27.0  |         |                   |

*FIT OPTION: Best-fit peaks using the binomial model of Galbraith and Green*

**INITIAL GUESS FOR MODEL PARAMETERS (number of peaks to fit = 3)**

| Peak #. | Peak Age | Theta | Fraction(%) | Count |
|---------|----------|-------|-------------|-------|
| 1.      | 30.80    | 0.586 | 2.9         | 2.80  |
| 2.      | 47.90    | 0.688 | 11.6        | 11.16 |
| 3.      | 85.10    | 0.797 | 42.1        | 40.45 |

Total range for grain ages: 30,0 to 200,3 Ma  
 Number of active grains (Num. used for fit): 96  
 Number of removed grains: 0  
 Degrees of freedom for fit: 91  
 Average of the SE(Z)'s for the grains: 0,2  
 Estimated width of peaks in PD plot in Z units: 0,24

**PARAMETERS FOR BEST-FIT PEAKS**

\* Standard error for peak age includes group error

\* Peak width is for PD plot assuming a kernel factor = 0.60

| #. | Peak Age(Ma) | 68%CI         | 95%CI          | W(Z) | Frac(%) | SE,% | Count |
|----|--------------|---------------|----------------|------|---------|------|-------|
| 1. | 32.9         | -8,5 ...+11,4 | -14,5 ...+26,0 | 0.29 | 2.0     | 1.9  | 1.9   |
| 2. | 64.9         | -2,5 ...+2,6  | -4,7 ...+5,1   | 0.17 | 37.4    | 6.7  | 35.9  |
| 3. | 103.6        | -3,4 ...+3,5  | -6,5 ...+6,9   | 0.19 | 60.7    | 6.7  | 58.3  |

Log-likelihood for best fit: -377,072  
 Chi-squared value for best fit: 98,995  
 Reduced chi-squared value: 1,088  
 Probability for F test: 0%  
 Condition number for COVAR matrix: 282,89  
 Number of iterations: 14

### Plot of Grain Ages (Unsorted)

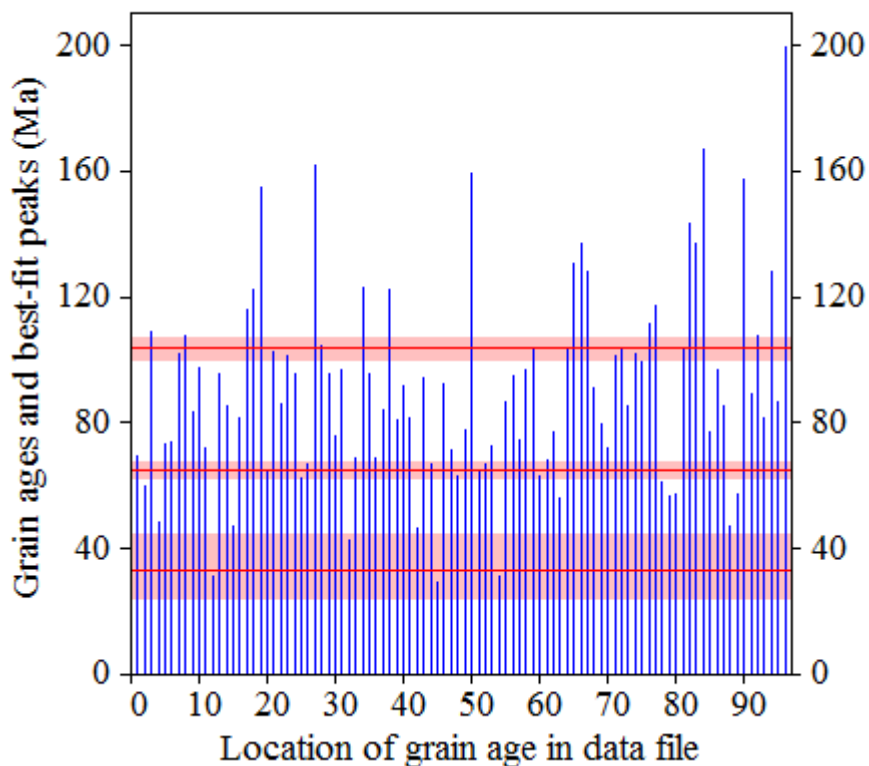

### Probability-Density Plot with Best-Fit Peaks

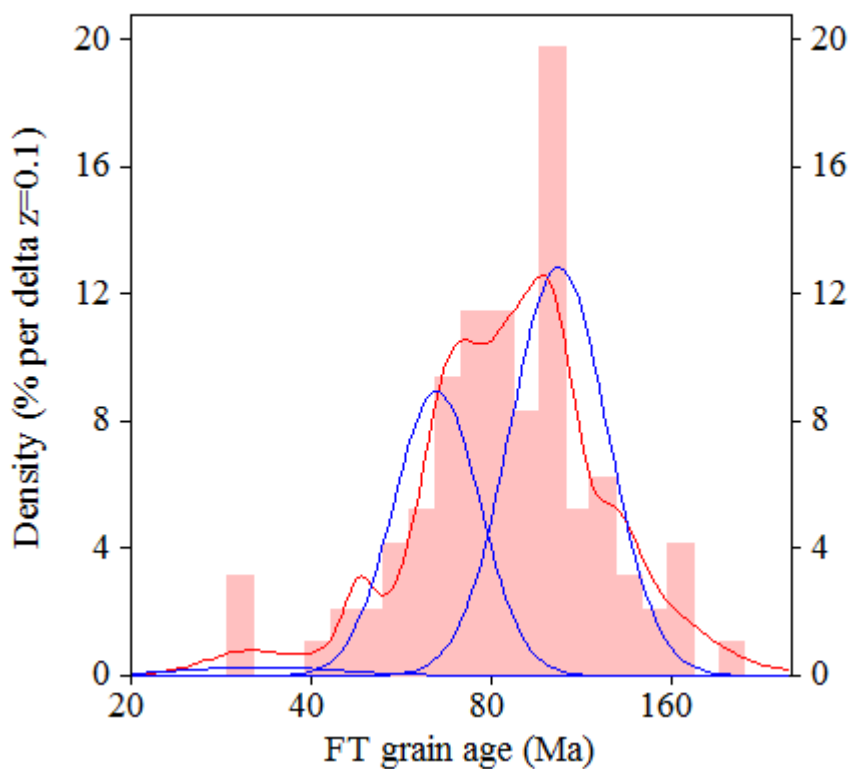

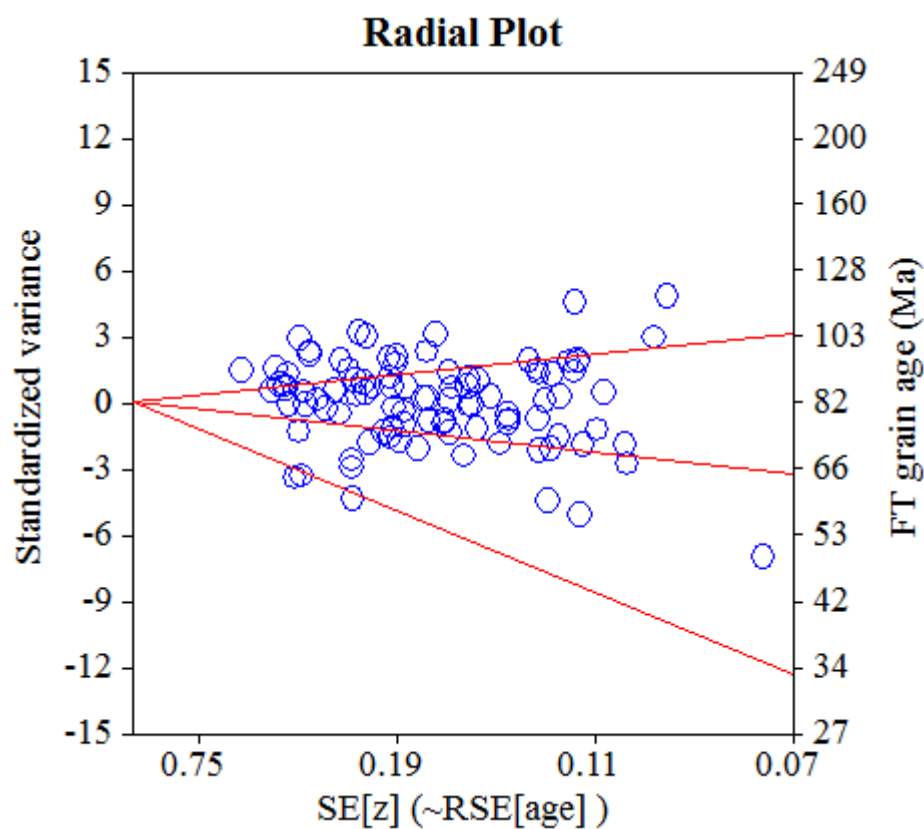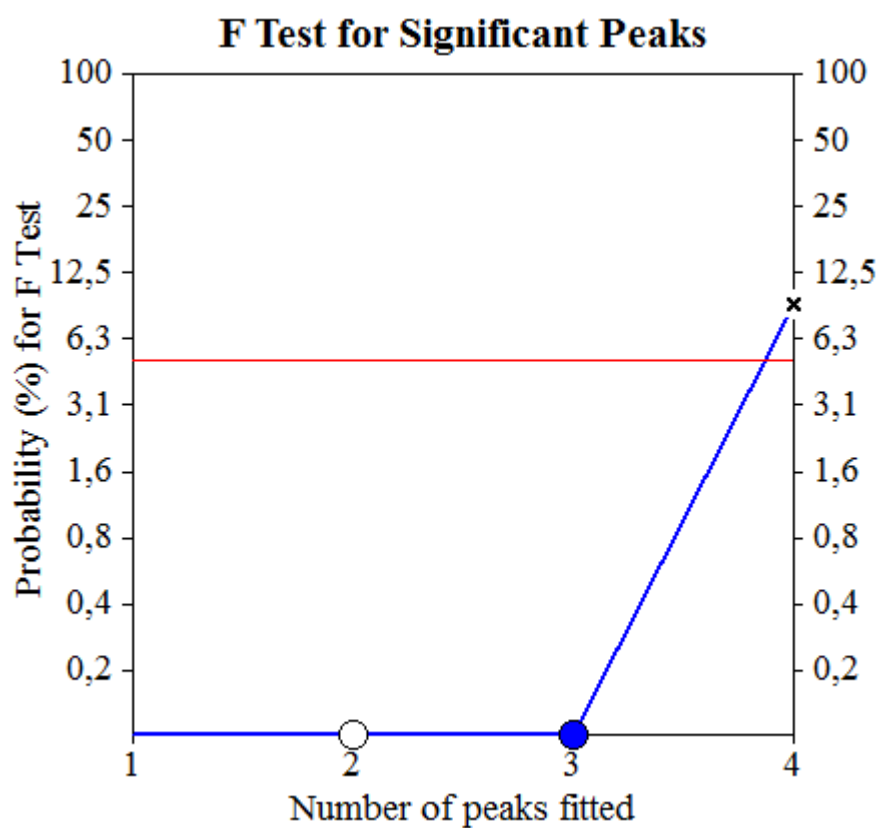



Datafile: C:\BH2\Edna\6-2015\CVI-1302\CVI\_1302\_6-2015-26A.FTZ.txt

Title: Sample No. CVI\_1302 Irr 6-2015-26

**NEW PARAMETERS - ZETA METHOD**EFFECTIVE TRACK DENSITY FOR FLUENCE MONITOR (tracks/cm<sup>2</sup>): 3,04E+05

RELATIVE ERROR (%): 1,13

EFFECTIVE URANIUM CONTENT OF MONITOR (ppm): 50,00

ZETA FACTOR AND STANDARD ERROR (yr cm<sup>2</sup>): 126,82 2,05SIZE OF COUNTER SQUARE (cm<sup>2</sup>): 8,30E-07**GRAIN AGES IN ORIGINAL ORDER**

| Grain<br>no. | RhoS<br>(cm <sup>-2</sup> ) | (Ns)   | RhoI<br>(cm <sup>-2</sup> ) | (Ni)   | Squares | U+/-2s  | Grain Age (Ma) |            |        |
|--------------|-----------------------------|--------|-----------------------------|--------|---------|---------|----------------|------------|--------|
|              |                             |        |                             |        |         |         | Age            | --95% CI-- |        |
| 1            | 6,75E+06                    | ( 112) | 1,14E+06                    | ( 19)  | 20      | 188 85  | 111.8          | 69.1       | 192.9  |
| 2            | 4,82E+06                    | ( 64)  | 9,79E+05                    | ( 13)  | 16      | 161 88  | 93.3           | 51.5       | 185.2  |
| 3            | 2,41E+06                    | ( 100) | 4,34E+05                    | ( 18)  | 50      | 71 33   | 105.4          | 64.1       | 185.4  |
| 4            | 5,30E+06                    | ( 176) | 9,64E+05                    | ( 32)  | 40      | 159 56  | 104.7          | 72.0       | 157.9  |
| 5            | 7,83E+06                    | ( 78)  | 1,61E+06                    | ( 16)  | 12      | 264 130 | 92.5           | 54.1       | 170.3  |
| 6            | 6,10E+06                    | ( 253) | 1,49E+06                    | ( 62)  | 50      | 246 62  | 77.6           | 58.7       | 102.4  |
| 7            | 5,76E+06                    | ( 287) | 1,02E+06                    | ( 51)  | 60      | 168 47  | 107.3          | 79.7       | 147.6  |
| 8            | 6,20E+06                    | ( 144) | 2,32E+06                    | ( 54)  | 28      | 382 104 | 51.1           | 37.2       | 71.3   |
| 9            | 8,13E+06                    | ( 81)  | 2,11E+06                    | ( 21)  | 12      | 347 150 | 73.5           | 45.4       | 125.4  |
| 10           | 4,55E+06                    | ( 34)  | 2,41E+06                    | ( 18)  | 9       | 396 185 | 36.2           | 20.0       | 68.1   |
| 11           | 8,48E+06                    | ( 352) | 1,61E+06                    | ( 67)  | 50      | 266 65  | 99.8           | 76.8       | 129.5  |
| 12           | 8,67E+06                    | ( 144) | 2,83E+06                    | ( 47)  | 20      | 466 136 | 58.7           | 42.0       | 83.5   |
| 13           | 4,69E+06                    | ( 35)  | 1,47E+06                    | ( 11)  | 9       | 242 143 | 60.4           | 30.4       | 132.6  |
| 14           | 7,93E+06                    | ( 79)  | 1,61E+06                    | ( 16)  | 12      | 264 130 | 93.7           | 54.9       | 172.3  |
| 15           | 6,48E+06                    | ( 86)  | 1,66E+06                    | ( 22)  | 16      | 272 115 | 74.5           | 46.5       | 125.3  |
| 16           | 8,96E+06                    | ( 119) | 1,66E+06                    | ( 22)  | 16      | 272 115 | 102.8          | 65.4       | 170.5  |
| 17           | 8,98E+06                    | ( 149) | 2,23E+06                    | ( 37)  | 20      | 367 120 | 76.9           | 53.6       | 113.6  |
| 18           | 6,69E+06                    | ( 333) | 1,20E+06                    | ( 60)  | 60      | 198 51  | 105.3          | 80.0       | 138.4  |
| 19           | 6,25E+06                    | ( 83)  | 9,79E+05                    | ( 13)  | 16      | 161 88  | 120.6          | 67.8       | 236.5  |
| 20           | 6,82E+06                    | ( 283) | 1,28E+06                    | ( 53)  | 50      | 210 58  | 101.9          | 76.0       | 139.4  |
| 21           | 8,04E+06                    | ( 667) | 1,55E+06                    | ( 129) | 100     | 256 45  | 98.5           | 81.4       | 119.2  |
| 22           | 5,54E+06                    | ( 69)  | 1,93E+06                    | ( 24)  | 15      | 317 128 | 54.9           | 34.3       | 91.6   |
| 23           | 5,60E+06                    | ( 372) | 1,11E+06                    | ( 74)  | 80      | 183 43  | 95.6           | 74.4       | 122.6  |
| 24           | 2,96E+06                    | ( 59)  | 1,61E+06                    | ( 32)  | 24      | 264 93  | 35.4           | 22.7       | 56.3   |
| 25           | 5,25E+06                    | ( 122) | 1,33E+06                    | ( 31)  | 28      | 219 78  | 75.1           | 50.6       | 115.5  |
| 26           | 4,59E+06                    | ( 61)  | 1,20E+06                    | ( 16)  | 16      | 198 98  | 72.5           | 41.7       | 135.2  |
| 27           | 9,13E+06                    | ( 379) | 1,30E+06                    | ( 54)  | 50      | 214 58  | 132.7          | 99.9       | 176.1  |
| 28           | 5,30E+06                    | ( 132) | 7,63E+05                    | ( 19)  | 30      | 126 57  | 131.6          | 81.9       | 225.6  |
| 29           | 7,63E+06                    | ( 57)  | 3,48E+06                    | ( 26)  | 9       | 572 223 | 42.0           | 26.1       | 69.7   |
| 30           | 3,25E+06                    | ( 135) | 2,17E+06                    | ( 90)  | 50      | 357 75  | 28.7           | 21.9       | 37.5   |
| 31           | 6,33E+06                    | ( 105) | 1,27E+06                    | ( 21)  | 20      | 208 90  | 95.1           | 59.6       | 160.3  |
| 32           | 5,28E+06                    | ( 92)  | 1,95E+06                    | ( 34)  | 21      | 321 109 | 51.8           | 34.7       | 79.3   |
| 33           | 6,46E+06                    | ( 134) | 1,40E+06                    | ( 29)  | 25      | 230 85  | 88.1           | 59.0       | 136.7  |
| 34           | 5,29E+06                    | ( 123) | 1,68E+06                    | ( 39)  | 28      | 276 88  | 60.3           | 41.9       | 89.0   |
| 35           | 5,42E+06                    | ( 72)  | 1,13E+06                    | ( 15)  | 16      | 186 94  | 91.1           | 52.3       | 171.6  |
| 36           | 4,96E+06                    | ( 103) | 8,67E+05                    | ( 18)  | 25      | 143 66  | 108.6          | 66.1       | 190.7  |
| 37           | 5,54E+06                    | ( 216) | 1,05E+06                    | ( 41)  | 47      | 173 54  | 100.4          | 72.0       | 144.0  |
| 38           | 2,61E+06                    | ( 26)  | 1,00E+05                    | ( 1)   | 12      | 17 27   | 425.6          | 81.8       | 9232.3 |
| 39           | 6,08E+06                    | ( 106) | 2,29E+06                    | ( 40)  | 21      | 377 119 | 50.8           | 35.1       | 75.1   |
| 40           | 3,68E+06                    | ( 55)  | 1,54E+06                    | ( 23)  | 18      | 253 105 | 45.7           | 27.8       | 78.2   |
| 41           | 4,92E+06                    | ( 49)  | 3,21E+06                    | ( 32)  | 12      | 528 186 | 29.4           | 18.5       | 47.5   |
| 42           | 6,28E+06                    | ( 198) | 1,33E+06                    | ( 42)  | 38      | 219 67  | 90.0           | 64.5       | 128.8  |
| 43           | 9,23E+06                    | ( 268) | 1,62E+06                    | ( 47)  | 35      | 266 77  | 108.7          | 79.8       | 151.6  |
| 44           | 8,28E+06                    | ( 165) | 8,53E+05                    | ( 17)  | 24      | 140 67  | 182.9          | 112.3      | 321.0  |
| 45           | 4,39E+06                    | ( 153) | 1,15E+06                    | ( 40)  | 42      | 189 59  | 73.1           | 51.5       | 106.4  |
| 46           | 4,42E+06                    | ( 33)  | 2,41E+06                    | ( 18)  | 9       | 396 185 | 35.1           | 19.3       | 66.3   |
| 47           | 8,96E+06                    | ( 223) | 2,01E+06                    | ( 50)  | 30      | 330 93  | 85.2           | 62.7       | 118.3  |
| 48           | 8,82E+06                    | ( 183) | 3,33E+06                    | ( 69)  | 25      | 547 132 | 50.6           | 38.3       | 66.7   |
| 49           | 8,89E+06                    | ( 118) | 1,73E+06                    | ( 23)  | 16      | 285 118 | 97.6           | 62.5       | 160.1  |
| 50           | 4,88E+06                    | ( 81)  | 2,05E+06                    | ( 34)  | 20      | 337 115 | 45.6           | 30.3       | 70.4   |
| 51           | 7,86E+06                    | ( 652) | 1,33E+06                    | ( 110) | 100     | 218 42  | 112.8          | 92.0       | 138.2  |
| 52           | 5,77E+06                    | ( 115) | 9,04E+05                    | ( 18)  | 24      | 149 69  | 121.1          | 74.1       | 211.7  |
| 53           | 6,02E+06                    | ( 250) | 9,88E+05                    | ( 41)  | 50      | 162 51  | 116.1          | 83.6       | 165.8  |

| Grain<br>no. | RhoS<br>(cm <sup>-2</sup> ) | (Ns)    | RhoI<br>(cm <sup>-2</sup> ) | (Ni)    | Squares | U+/-2s  | Grain Age (Ma) |            |        |
|--------------|-----------------------------|---------|-----------------------------|---------|---------|---------|----------------|------------|--------|
|              |                             |         |                             |         |         |         | Age            | --95% CI-- |        |
| 54           | 7,20E+06                    | ( 251)  | 8,61E+05                    | ( 30)   | 42      | 142 51  | 158.5          | 109.2      | 239.7  |
| 55           | 9,69E+06                    | ( 201)  | 1,30E+06                    | ( 27)   | 25      | 214 82  | 141.2          | 95.0       | 219.5  |
| 56           | 8,28E+06                    | ( 110)  | 3,01E+05                    | ( 4)    | 16      | 50 47   | 491.1          | 198.1      | 1727.0 |
| 57           | 3,88E+06                    | ( 116)  | 8,70E+05                    | ( 26)   | 36      | 143 56  | 85.0           | 55.6       | 135.8  |
| 58           | 3,40E+06                    | ( 79)   | 2,62E+06                    | ( 61)   | 28      | 432 111 | 24.9           | 17.6       | 35.4   |
| 59           | 7,23E+06                    | ( 150)  | 1,16E+06                    | ( 24)   | 25      | 190 77  | 118.7          | 77.4       | 191.2  |
| 60           | 7,57E+06                    | ( 628)  | 1,22E+06                    | ( 101)  | 100     | 200 40  | 118.2          | 95.7       | 146.0  |
| 61           | 5,87E+06                    | ( 78)   | 9,79E+05                    | ( 13)   | 16      | 161 88  | 113.4          | 63.5       | 223.0  |
| 62           | 5,48E+06                    | ( 364)  | 1,31E+06                    | ( 87)   | 80      | 216 46  | 79.7           | 63.0       | 100.8  |
| 63           | 5,98E+06                    | ( 124)  | 9,64E+05                    | ( 20)   | 25      | 159 70  | 117.6          | 73.7       | 199.4  |
| 64           | 5,98E+06                    | ( 248)  | 1,23E+06                    | ( 51)   | 50      | 202 57  | 92.8           | 68.7       | 128.2  |
| 65           | 7,13E+06                    | ( 355)  | 1,20E+06                    | ( 60)   | 60      | 198 51  | 112.1          | 85.3       | 147.3  |
| 66           | 5,36E+06                    | ( 267)  | 9,64E+05                    | ( 48)   | 60      | 159 46  | 106.0          | 78.1       | 147.4  |
| 67           | 5,62E+06                    | ( 56)   | 1,20E+06                    | ( 12)   | 12      | 198 112 | 88.4           | 47.5       | 181.9  |
| 68           | 6,85E+06                    | ( 273)  | 1,33E+06                    | ( 53)   | 48      | 219 60  | 98.3           | 73.3       | 134.6  |
| <hr/>        |                             |         |                             |         |         |         |                |            |        |
| POOLED       | 6,36E+06                    | (11865) | 1,37E+06                    | ( 2566) | 2249    | 226 10  | 88.5           | 83.6       | 93.7   |

CHI^2 PROBABILITY (%): 0.0

|                |                         |       |         |                    |
|----------------|-------------------------|-------|---------|--------------------|
| POOLED AGE W/  | 68% CONF. INTERVAL(Ma): | 88.5, | 86.0 -- | 91.1 ( -2.5 +2.6)  |
|                | 95% CONF. INTERVAL(Ma): |       | 83.6 -- | 93.7 ( -4.9 +5.2)  |
| <br>           |                         |       |         |                    |
| CENTRAL AGE W/ | 68% CONF. INTERVAL(Ma): | 80.9, | 76.1 -- | 85.9 ( -4.8 +5.1)  |
|                | 95% CONF. INTERVAL(Ma): |       | 71.8 -- | 91.1 ( -9.1 +10.3) |
|                | AGE DISPERSION (%):     | 43.2  |         |                    |

*FIT OPTION: Best-fit peaks using the binomial model of Galbraith and Green*

**INITIAL GUESS FOR MODEL PARAMETERS (number of peaks to fit = 3)**

| Peak #. | Peak Age | Theta | Fraction(%) | Count |
|---------|----------|-------|-------------|-------|
| 1.      | 24.90    | 0.564 | 3.9         | 2.62  |
| 2.      | 88.50    | 0.822 | 37.4        | 25.45 |
| 3.      | 99.10    | 0.838 | 51.6        | 35.10 |

Total range for grain ages: 24,9 to 456,8 Ma  
 Number of active grains (Num. used for fit): 68  
 Number of removed grains: 0  
 Degrees of freedom for fit: 63  
 Average of the SE(Z)'s for the grains: 0,24  
 Estimated width of peaks in PD plot in Z units: 0,28

**PARAMETERS FOR BEST-FIT PEAKS**

\* Standard error for peak age includes group error

\* Peak width is for PD plot assuming a kernel factor = 0.60

| #. | Peak Age(Ma) | 68%CI        | 95%CI        | W(Z) | Frac(%) | SE, % | Count |
|----|--------------|--------------|--------------|------|---------|-------|-------|
| 1. | 29.2         | -2,9 ...+3,2 | -5,4 ...+6,6 | 0.21 | 6.4     | 3.7   | 4.3   |
| 2. | 52.0         | -3,9 ...+4,2 | -7,3 ...+8,5 | 0.23 | 18.9    | 5.6   | 12.9  |
| 3. | 103.8        | -3,3 ...+3,4 | -6,4 ...+6,8 | 0.21 | 74.7    | 5.8   | 50.8  |

Log-likelihood for best fit: -252,314  
 Chi-squared value for best fit: 67,569  
 Reduced chi-squared value: 1,073  
 Probability for F test: 0%  
 Condition number for COVAR matrix: 17,08  
 Number of iterations: 18

### Plot of Grain Ages (Unsorted)

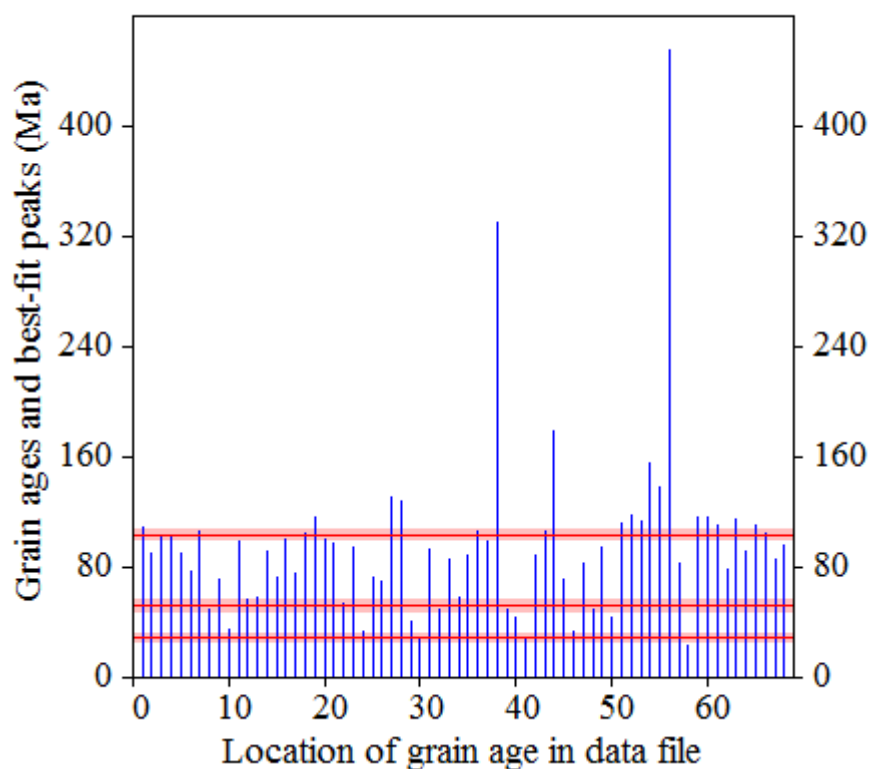

### Probability-Density Plot with Best-Fit Peaks

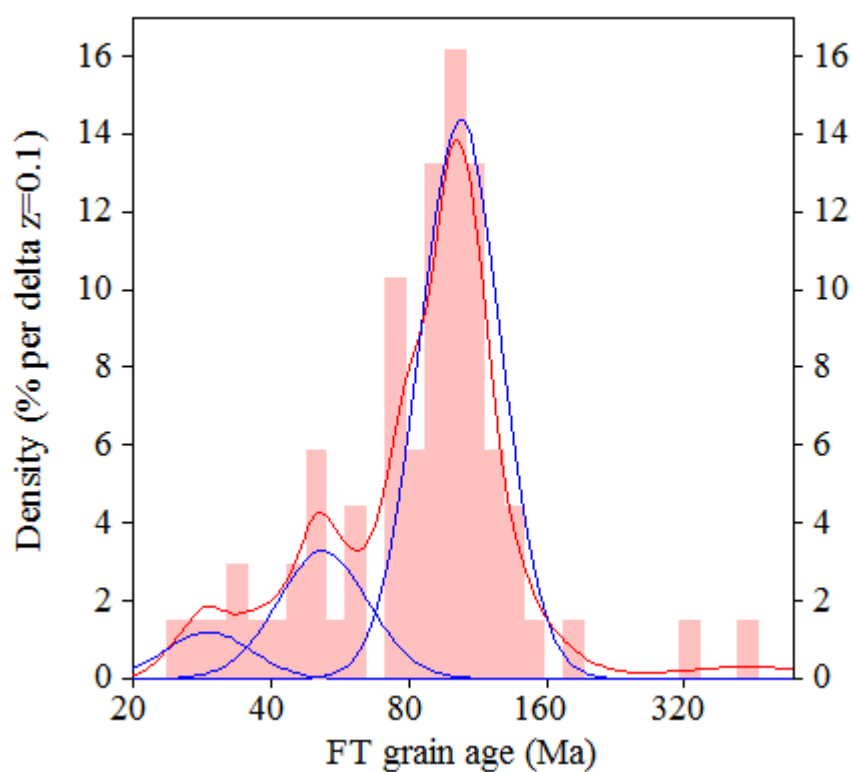

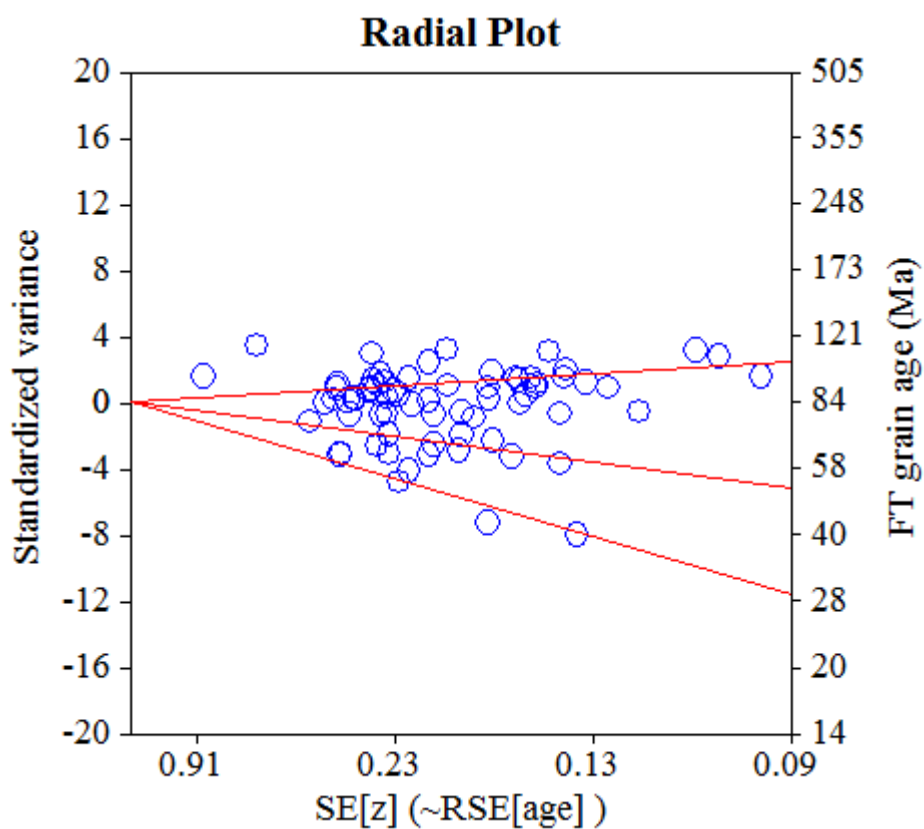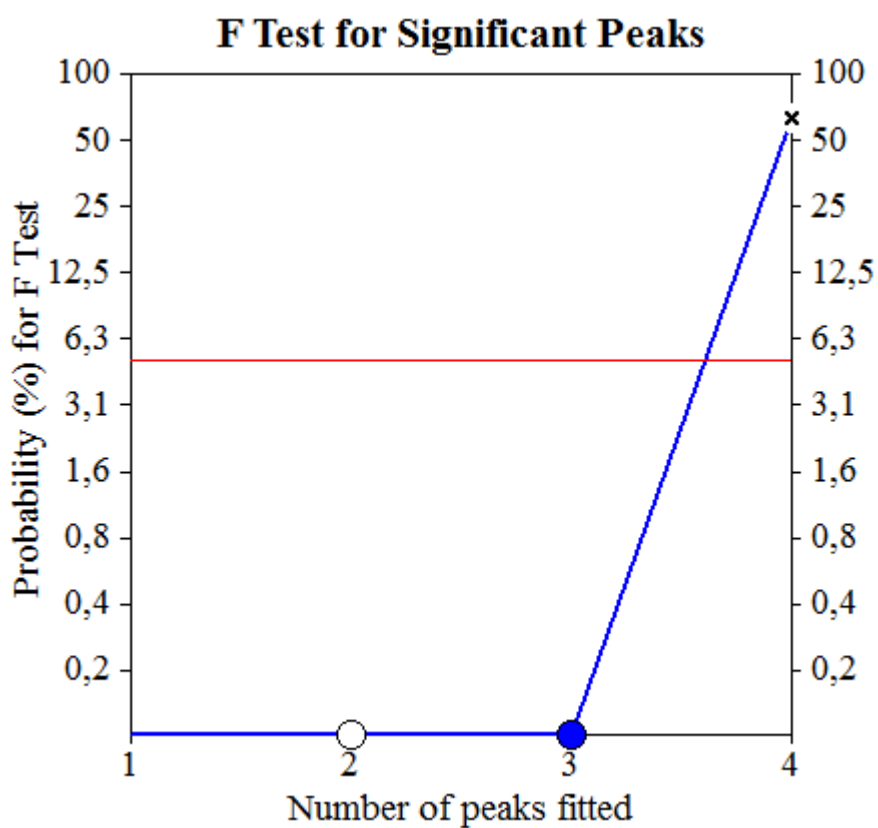

Datafile: C:\BH2\Edna\12-2015\EMP\_49\EMP\_16\_12\_2015\_20.ftz

Title: Sample No. EMP\_49 Irr 12-2015-22

**NEW PARAMETERS - ZETA METHOD**EFFECTIVE TRACK DENSITY FOR FLUENCE MONITOR (tracks/cm<sup>2</sup>): 2,77E+05

RELATIVE ERROR (%): 1,23

EFFECTIVE URANIUM CONTENT OF MONITOR (ppm): 50,00

ZETA FACTOR AND STANDARD ERROR (yr cm<sup>2</sup>): 128,02 1,87SIZE OF COUNTER SQUARE (cm<sup>2</sup>): 8,30E-07**GRAIN AGES IN ORIGINAL ORDER**

| Grain<br>no. | RhoS<br>(cm <sup>-2</sup> ) | (Ns)   | RhoI<br>(cm <sup>-2</sup> ) | (Ni)   | Squares | U+/-2s  | Grain Age (Ma) |            |       |  |
|--------------|-----------------------------|--------|-----------------------------|--------|---------|---------|----------------|------------|-------|--|
|              |                             |        |                             |        |         |         | Age            | --95% CI-- |       |  |
| 1            | 7,28E+06                    | ( 302) | 1,20E+06                    | ( 50)  | 50      | 217 61  | 106.1          | 78.7       | 146.2 |  |
| 2            | 6,60E+06                    | ( 274) | 1,37E+06                    | ( 57)  | 50      | 248 66  | 84.1           | 63.2       | 111.8 |  |
| 3            | 5,76E+06                    | ( 478) | 1,48E+06                    | ( 123) | 100     | 267 49  | 68.4           | 56.0       | 83.5  |  |
| 4            | 3,80E+06                    | ( 63)  | 6,02E+05                    | ( 10)  | 20      | 109 67  | 109.4          | 56.7       | 240.1 |  |
| 5            | 6,07E+06                    | ( 247) | 9,34E+05                    | ( 38)  | 49      | 168 54  | 114.0          | 81.2       | 165.0 |  |
| 6            | 4,73E+06                    | ( 165) | 4,02E+05                    | ( 14)  | 42      | 72 38   | 203.8          | 120.0      | 380.0 |  |
| 7            | 4,03E+06                    | ( 164) | 4,92E+05                    | ( 20)  | 49      | 89 39   | 143.0          | 90.6       | 240.3 |  |
| 8            | 9,04E+06                    | ( 225) | 1,37E+06                    | ( 34)  | 30      | 246 84  | 116.0          | 81.1       | 171.7 |  |
| 9            | 6,55E+06                    | ( 87)  | 9,04E+05                    | ( 12)  | 16      | 163 92  | 126.0          | 69.7       | 253.8 |  |
| 10           | 5,54E+06                    | ( 230) | 6,02E+05                    | ( 25)  | 50      | 109 43  | 160.4          | 106.9      | 252.9 |  |
| 11           | 5,24E+06                    | ( 87)  | 7,23E+05                    | ( 12)  | 20      | 130 74  | 126.0          | 69.7       | 253.8 |  |
| 12           | 8,07E+06                    | ( 134) | 1,81E+06                    | ( 30)  | 20      | 326 118 | 78.5           | 52.8       | 121.1 |  |
| 13           | 7,67E+06                    | ( 191) | 1,53E+06                    | ( 38)  | 30      | 275 89  | 88.3           | 62.4       | 128.8 |  |
| 14           | 5,75E+06                    | ( 191) | 7,53E+05                    | ( 25)  | 40      | 136 54  | 133.5          | 88.5       | 211.6 |  |
| 15           | 7,23E+06                    | ( 210) | 1,65E+06                    | ( 48)  | 35      | 298 86  | 77.0           | 56.2       | 107.8 |  |
| 16           | 8,29E+06                    | ( 344) | 1,40E+06                    | ( 58)  | 50      | 252 66  | 103.6          | 78.5       | 136.7 |  |
| 17           | 2,37E+06                    | ( 59)  | 2,41E+05                    | ( 6)   | 30      | 43 34   | 168.3          | 75.1       | 477.0 |  |
| 18           | 6,60E+06                    | ( 219) | 1,42E+06                    | ( 47)  | 40      | 255 74  | 82.0           | 59.8       | 115.0 |  |
| 19           | 2,74E+06                    | ( 91)  | 4,22E+05                    | ( 14)  | 40      | 76 40   | 113.3          | 65.0       | 215.9 |  |
| 20           | 8,06E+06                    | ( 107) | 1,43E+06                    | ( 19)  | 16      | 258 117 | 98.5           | 60.7       | 170.4 |  |
| 21           | 7,95E+06                    | ( 66)  | 8,43E+05                    | ( 7)   | 10      | 152 111 | 162.0          | 76.4       | 418.9 |  |
| 22           | 5,73E+06                    | ( 476) | 1,08E+06                    | ( 90)  | 100     | 195 41  | 92.7           | 73.9       | 116.2 |  |
| 23           | 4,56E+06                    | ( 265) | 1,41E+06                    | ( 82)  | 70      | 254 56  | 56.8           | 44.3       | 72.8  |  |
| 24           | 3,93E+06                    | ( 261) | 8,58E+05                    | ( 57)  | 80      | 155 41  | 80.1           | 60.2       | 106.6 |  |
| 25           | 7,11E+06                    | ( 118) | 1,39E+06                    | ( 23)  | 20      | 250 103 | 89.9           | 57.6       | 147.7 |  |
| 26           | 3,32E+06                    | ( 248) | 4,28E+05                    | ( 32)  | 90      | 77 27   | 135.6          | 94.2       | 202.6 |  |
| 27           | 4,82E+06                    | ( 168) | 1,15E+06                    | ( 40)  | 42      | 207 65  | 73.9           | 52.3       | 107.3 |  |
| 28           | 8,76E+06                    | ( 109) | 2,01E+06                    | ( 25)  | 15      | 362 144 | 76.6           | 49.5       | 123.7 |  |
| 29           | 7,20E+06                    | ( 299) | 1,57E+06                    | ( 65)  | 50      | 282 70  | 80.6           | 61.6       | 105.3 |  |
| 30           | 7,44E+06                    | ( 247) | 1,99E+06                    | ( 66)  | 40      | 358 88  | 65.6           | 50.0       | 86.1  |  |
| 31           | 4,22E+06                    | ( 210) | 4,42E+05                    | ( 22)  | 60      | 80 34   | 166.2          | 108.0      | 270.7 |  |
| 32           | 6,40E+06                    | ( 85)  | 1,20E+06                    | ( 16)  | 16      | 217 107 | 92.9           | 54.6       | 170.3 |  |
| 33           | 6,69E+06                    | ( 50)  | 1,47E+06                    | ( 11)  | 9       | 265 157 | 79.3           | 41.3       | 169.8 |  |
| 34           | 8,55E+06                    | ( 213) | 1,57E+06                    | ( 39)  | 30      | 282 90  | 95.9           | 68.3       | 138.8 |  |
| 35           | 6,90E+06                    | ( 573) | 1,06E+06                    | ( 88)  | 100     | 191 41  | 114.0          | 91.0       | 142.7 |  |
| 36           | 7,04E+06                    | ( 146) | 1,73E+06                    | ( 36)  | 25      | 313 104 | 71.4           | 49.5       | 106.0 |  |
| 37           | 4,50E+06                    | ( 112) | 2,81E+05                    | ( 7)   | 30      | 51 37   | 272.2          | 132.0      | 685.4 |  |
| 38           | 5,93E+06                    | ( 246) | 9,64E+05                    | ( 40)  | 50      | 174 55  | 107.9          | 77.4       | 154.9 |  |
| 39           | 6,51E+06                    | ( 216) | 1,51E+06                    | ( 50)  | 40      | 271 77  | 76.1           | 55.9       | 105.8 |  |
| 40           | 5,92E+06                    | ( 59)  | 1,51E+06                    | ( 15)  | 12      | 271 138 | 68.9           | 39.0       | 131.3 |  |
| 41           | 3,06E+06                    | ( 142) | 5,38E+05                    | ( 25)  | 56      | 97 38   | 99.5           | 65.2       | 159.2 |  |
| 42           | 9,12E+06                    | ( 227) | 1,37E+06                    | ( 34)  | 30      | 246 84  | 117.0          | 81.8       | 173.2 |  |
| 43           | 4,05E+06                    | ( 84)  | 6,75E+05                    | ( 14)  | 25      | 122 64  | 104.7          | 59.8       | 200.2 |  |
| 44           | 5,53E+06                    | ( 225) | 1,25E+06                    | ( 51)  | 49      | 226 63  | 77.7           | 57.3       | 107.6 |  |
| 45           | 6,14E+06                    | ( 255) | 1,57E+06                    | ( 65)  | 50      | 282 70  | 68.8           | 52.4       | 90.3  |  |
| 46           | 4,13E+06                    | ( 137) | 1,48E+06                    | ( 49)  | 40      | 266 76  | 49.4           | 35.5       | 70.0  |  |
| 47           | 2,30E+06                    | ( 153) | 4,82E+05                    | ( 32)  | 80      | 87 31   | 84.0           | 57.4       | 127.3 |  |
| 48           | 3,34E+06                    | ( 222) | 4,22E+05                    | ( 28)  | 80      | 76 29   | 138.6          | 94.0       | 213.3 |  |
| 49           | 6,10E+06                    | ( 76)  | 1,12E+06                    | ( 14)  | 15      | 203 107 | 94.8           | 53.8       | 182.1 |  |
| 50           | 7,13E+06                    | ( 142) | 1,26E+06                    | ( 25)  | 24      | 226 90  | 99.5           | 65.2       | 159.2 |  |
| 51           | 2,82E+06                    | ( 187) | 3,92E+05                    | ( 26)  | 80      | 71 27   | 125.8          | 83.8       | 197.7 |  |
| 52           | 8,03E+06                    | ( 80)  | 1,20E+06                    | ( 12)  | 12      | 217 123 | 116.0          | 63.8       | 234.5 |  |
| 53           | 8,76E+06                    | ( 218) | 1,20E+06                    | ( 30)  | 30      | 217 79  | 127.2          | 87.2       | 193.1 |  |

Datafile: C:\BH2\Edna\12-2015\EMP\_49\EMP\_16\_12\_2015\_20.ftz

Title: Sample No. EMP\_49 Irr 12-2015-22

| Grain<br>no. | RhoS<br>(cm <sup>-2</sup> ) | (Ns)            | RhoI<br>(cm <sup>-2</sup> ) | (Ni)  | Squares | U+/-2s  | Grain Age (Ma) |            |        |
|--------------|-----------------------------|-----------------|-----------------------------|-------|---------|---------|----------------|------------|--------|
|              |                             |                 |                             |       |         |         | Age            | --95% CI-- |        |
| 54           | 1,54E+06                    | ( 46)           | 1,67E+05                    | ( 5)  | 36      | 30 26   | 156.9          | 64.8       | 506.6  |
| 55           | 3,33E+06                    | ( 69)           | 3,37E+05                    | ( 7)  | 25      | 61 44   | 169.2          | 80.0       | 436.6  |
| 56           | 2,71E+06                    | ( 90)           | 4,52E+05                    | ( 15) | 40      | 81 41   | 104.7          | 61.0       | 195.3  |
| 57           | 4,82E+06                    | ( 64)           | 8,28E+05                    | ( 11) | 16      | 149 88  | 101.3          | 53.8       | 213.8  |
| 58           | 2,31E+06                    | ( 94)           | 4,43E+05                    | ( 18) | 49      | 80 37   | 91.4           | 55.3       | 161.3  |
| 59           | 3,33E+06                    | ( 83)           | 4,82E+05                    | ( 12) | 30      | 87 49   | 120.3          | 66.3       | 242.7  |
| 60           | 3,13E+06                    | ( 78)           | 7,63E+05                    | ( 19) | 30      | 138 62  | 72.0           | 43.5       | 126.3  |
| 61           | 2,81E+06                    | ( 28)           | 9,04E+05                    | ( 9)  | 12      | 163 106 | 54.3           | 25.3       | 131.8  |
| 62           | 7,98E+06                    | ( 265)          | 1,48E+06                    | ( 49) | 40      | 266 76  | 95.1           | 70.1       | 131.8  |
| 63           | 3,10E+06                    | ( 103)          | 5,12E+05                    | ( 17) | 40      | 92 44   | 105.9          | 63.7       | 189.1  |
| 64           | 3,34E+06                    | ( 111)          | 6,63E+05                    | ( 22) | 40      | 119 50  | 88.4           | 56.0       | 147.1  |
| 65           | 7,15E+06                    | ( 178)          | 1,24E+06                    | ( 31) | 30      | 224 80  | 100.7          | 68.9       | 152.8  |
| 66           | 6,48E+06                    | ( 538)          | 1,05E+06                    | ( 87) | 100     | 189 41  | 108.3          | 86.3       | 135.8  |
| 67           | 3,31E+06                    | ( 44)           | 1,51E+05                    | ( 2)  | 16      | 27 34   | 353.9          | 101.1      | 2682.8 |
| 68           | 5,37E+06                    | ( 312)          | 1,27E+06                    | ( 74) | 70      | 230 53  | 73.9           | 57.4       | 95.3   |
| 69           | 7,15E+06                    | ( 178)          | 1,24E+06                    | ( 31) | 30      | 224 80  | 100.7          | 68.9       | 152.8  |
| 70           | 6,48E+06                    | ( 538)          | 1,05E+06                    | ( 87) | 100     | 189 41  | 108.3          | 86.3       | 135.8  |
| 71           | 3,31E+06                    | ( 44)           | 1,51E+05                    | ( 2)  | 16      | 27 34   | 353.9          | 101.1      | 2682.8 |
| 72           | 5,37E+06                    | ( 312)          | 1,27E+06                    | ( 74) | 70      | 230 53  | 73.9           | 57.4       | 95.3   |
| 73           | 5,11E+06                    | ( 178)          | 1,15E+06                    | ( 40) | 42      | 207 65  | 78.3           | 55.5       | 113.4  |
| 74           | 5,37E+06                    | ( 223)          | 5,30E+05                    | ( 22) | 50      | 96 40   | 176.3          | 114.8      | 286.8  |
| 75           | 5,54E+06                    | ( 138)          | 9,64E+05                    | ( 24) | 30      | 174 70  | 100.7          | 65.5       | 162.8  |
| 76           | 5,14E+06                    | ( 128)          | 8,03E+05                    | ( 20) | 30      | 145 64  | 111.9          | 70.2       | 189.6  |
| 77           | 5,54E+06                    | ( 184)          | 1,11E+06                    | ( 37) | 40      | 201 66  | 87.4           | 61.4       | 128.2  |
| 78           | 7,35E+06                    | ( 305)          | 1,01E+06                    | ( 42) | 50      | 182 56  | 127.3          | 92.4       | 180.2  |
| 79           | 1,69E+06                    | ( 42)           | 3,61E+05                    | ( 9)  | 30      | 65 42   | 81.2           | 39.6       | 190.8  |
| 80           | 2,83E+06                    | ( 188)          | 6,02E+05                    | ( 40) | 80      | 109 34  | 82.7           | 58.7       | 119.5  |
| 81           | 4,92E+06                    | ( 143)          | 8,26E+05                    | ( 24) | 35      | 149 60  | 104.4          | 67.9       | 168.4  |
| 82           | 2,21E+06                    | ( 33)           | 1,34E+05                    | ( 2)  | 18      | 24 31   | 267.5          | 74.5       | 2127.5 |
| 83           | 7,08E+06                    | ( 94)           | 8,28E+05                    | ( 11) | 16      | 149 88  | 148.1          | 80.5       | 307.1  |
| 84           | 5,35E+06                    | ( 71)           | 9,04E+05                    | ( 12) | 16      | 163 92  | 103.1          | 56.3       | 209.5  |
| 85           | 9,49E+06                    | ( 126)          | 2,64E+06                    | ( 35) | 16      | 475 160 | 63.4           | 43.5       | 95.2   |
| 86           | 8,18E+06                    | ( 285)          | 2,67E+06                    | ( 93) | 42      | 481 100 | 53.9           | 42.6       | 68.2   |
| 87           | 7,68E+06                    | ( 255)          | 1,72E+06                    | ( 57) | 40      | 309 82  | 78.3           | 58.8       | 104.3  |
| 88           | 2,94E+06                    | ( 171)          | 2,58E+05                    | ( 15) | 70      | 47 24   | 197.4          | 118.2      | 359.6  |
| 89           | 7,93E+06                    | ( 79)           | 1,81E+06                    | ( 18) | 12      | 326 152 | 76.9           | 46.1       | 136.8  |
| 90           | 6,35E+06                    | ( 369)          | 1,36E+06                    | ( 79) | 70      | 245 55  | 81.9           | 64.2       | 104.5  |
| 91           | 2,82E+06                    | ( 164)          | 4,48E+05                    | ( 26) | 70      | 81 31   | 110.5          | 73.3       | 174.3  |
| 92           | 3,90E+06                    | ( 97)           | 4,82E+05                    | ( 12) | 30      | 87 49   | 140.3          | 78.0       | 281.3  |
| 93           | 5,79E+06                    | ( 202)          | 1,69E+06                    | ( 59) | 42      | 305 79  | 60.0           | 44.9       | 80.2   |
| 94           | 8,19E+06                    | ( 204)          | 2,17E+06                    | ( 54) | 30      | 391 106 | 66.6           | 49.2       | 91.8   |
| 95           | 6,53E+06                    | ( 271)          | 1,42E+06                    | ( 59) | 50      | 256 67  | 80.4           | 60.7       | 106.5  |
| 96           | 5,23E+06                    | ( 152)          | 9,64E+05                    | ( 28) | 35      | 174 65  | 95.2           | 63.7       | 148.3  |
| 97           | 5,49E+06                    | ( 114)          | 1,35E+06                    | ( 28) | 25      | 243 91  | 71.6           | 47.3       | 112.7  |
| POOLED       |                             | 5,30E+06(17574) | 9,99E+05( 3314)             |       | 3996    | 180 8   | 93.5           | 88.7       | 98.5   |

CHI^2 PROBABILITY (%): 0.0

|                |                         |       |         |                    |
|----------------|-------------------------|-------|---------|--------------------|
| POOLED AGE W/  | 68% CONF. INTERVAL(Ma): | 93.5, | 91.0 -- | 96.0 ( -2.5 +2.5)  |
|                | 95% CONF. INTERVAL(Ma): |       | 88.7 -- | 98.5 ( -4.8 +5.0)  |
| CENTRAL AGE W/ | 68% CONF. INTERVAL(Ma): | 95.7, | 92.2 -- | 99.3 ( -3.4 +3.6)  |
|                | 95% CONF. INTERVAL(Ma): |       | 89.1 -- | 102.8 ( -6.6 +7.1) |
|                | AGE DISPERSION (%):     | 23.2  |         |                    |

*FIT OPTION: Best-fit peaks using the binomial model of Galbraith and Green*

**INITIAL GUESS FOR MODEL PARAMETERS (number of peaks to fit = 3)**

| Peak #. | Peak Age | Theta | Fraction(%) | Count |
|---------|----------|-------|-------------|-------|
| 1.      | 93.50    | 0.841 | 41.1        | 39.89 |
| 2.      | 109.40   | 0.861 | 41.8        | 40.50 |
| 3.      | 139.60   | 0.888 | 18.9        | 18.33 |

Total range for grain ages: 49,1 to 308,6 Ma  
 Number of active grains (Num. used for fit): 97  
 Number of removed grains: 0  
 Degrees of freedom for fit: 92  
 Average of the SE(Z)'s for the grains: 0,25  
 Estimated width of peaks in PD plot in Z units: 0,3

**PARAMETERS FOR BEST-FIT PEAKS**

\* Standard error for peak age includes group error

\* Peak width is for PD plot assuming a kernel factor = 0.60

| #. | Peak Age(Ma) | 68%CI          | 95%CI          | W(Z) | Frac(%) | SE,% | Count |
|----|--------------|----------------|----------------|------|---------|------|-------|
| 1. | 74.4         | -3,5 ...+3,7   | -6,7 ...+7,4   | 0.19 | 37.1    | 10.7 | 35.9  |
| 2. | 107.4        | -7,2 ...+7,7   | -13,6 ...+15,6 | 0.23 | 52.8    | 11.5 | 51.3  |
| 3. | 158.4        | -25,8 ...+30,7 | -46,6 ...+65,6 | 0.31 | 10.1    | 9.0  | 9.8   |

Log-likelihood for best fit: -331,339  
 Chi-squared value for best fit: 97,246  
 Reduced chi-squared value: 1,057  
 Probability for F test: 0%  
 Condition number for COVAR matrix: 41,65  
 Number of iterations: 22



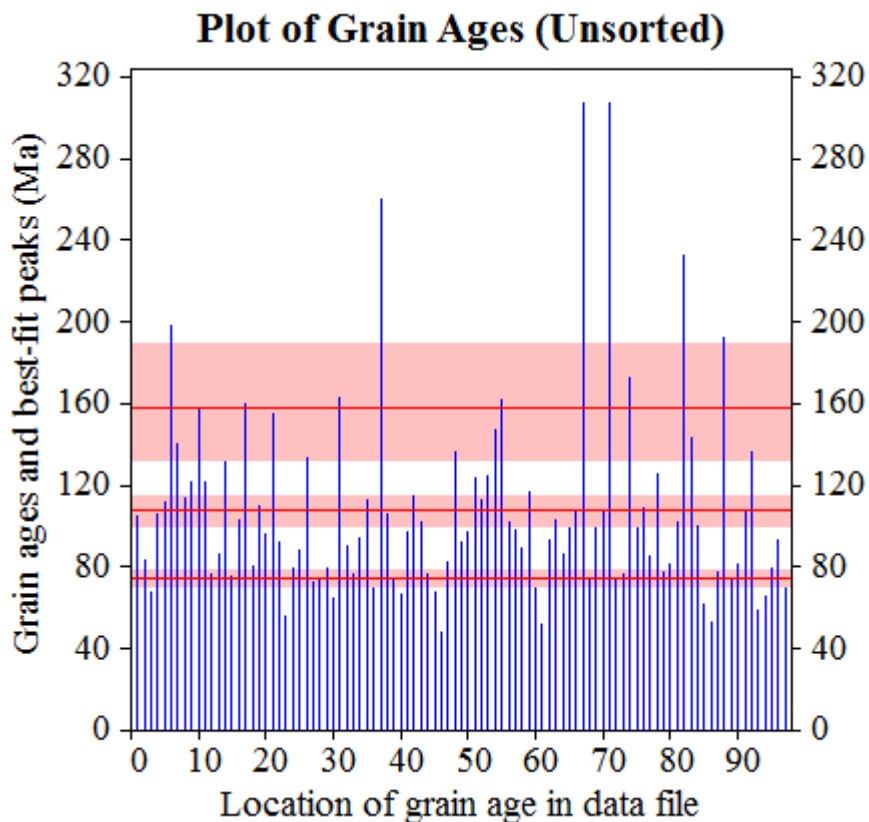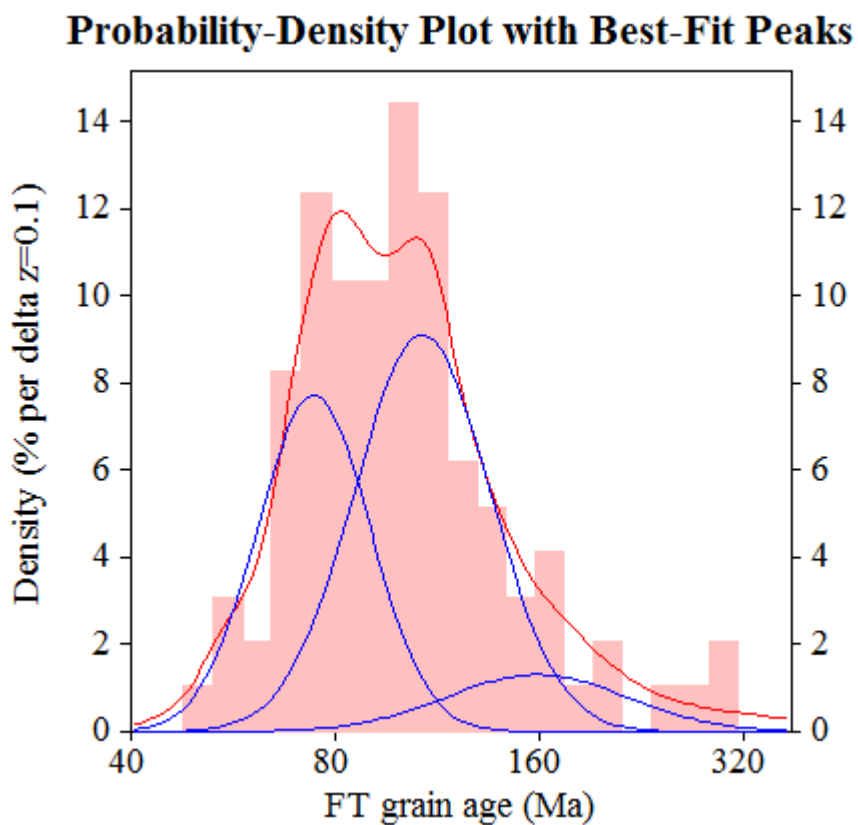

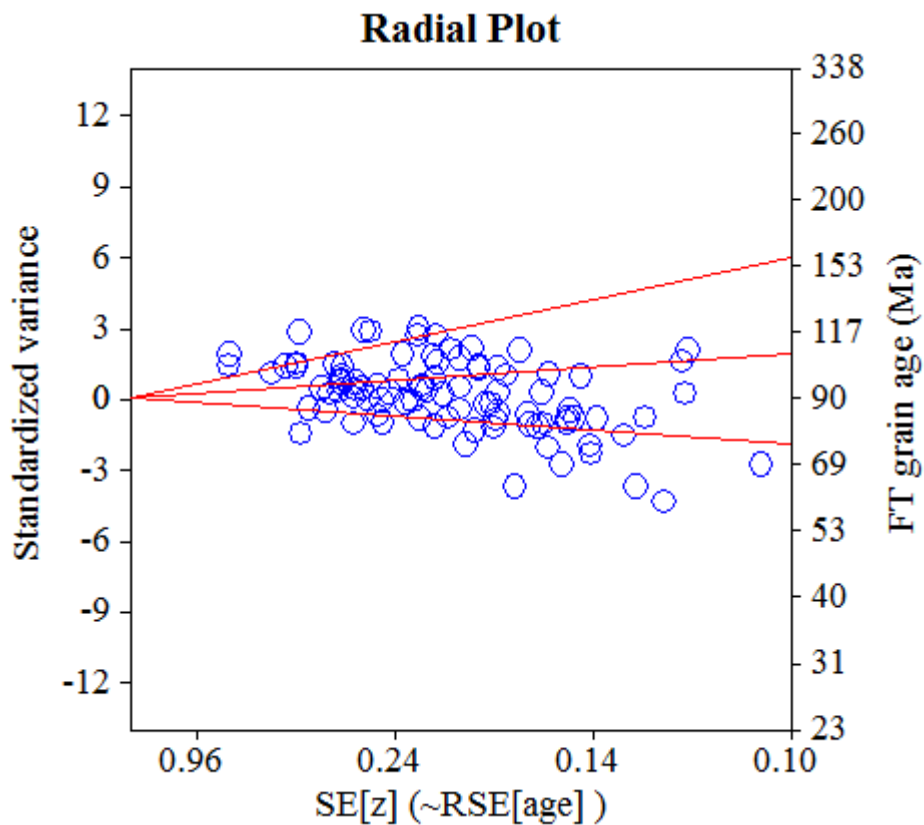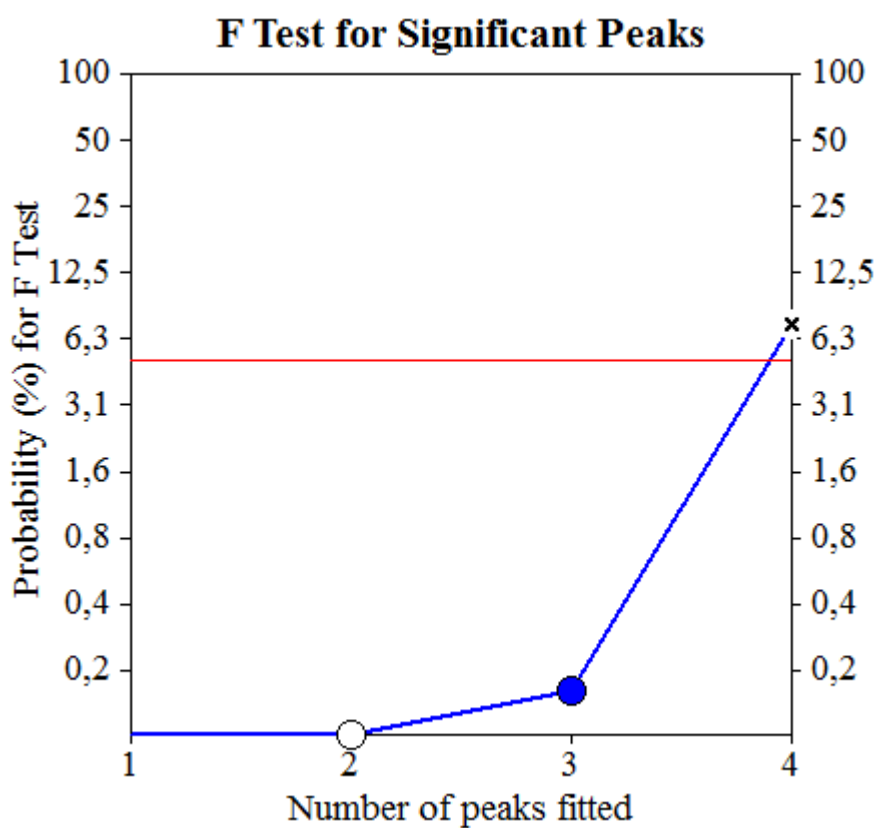

**NEW PARAMETERS - ZETA METHOD**

EFFECTIVE TRACK DENSITY FOR FLUENCE MONITOR (tracks/cm<sup>2</sup>): 2.76E+05  
 RELATIVE ERROR (%): 1.22  
 EFFECTIVE URANIUM CONTENT OF MONITOR (ppm): 50.00  
 ZETA FACTOR AND STANDARD ERROR (yr cm<sup>2</sup>): 128.02 1.87  
 SIZE OF COUNTER SQUARE (cm<sup>2</sup>): 8.30E-07

**GRAIN AGES IN ORIGINAL ORDER**

| Grain<br>no. | RhoS<br>(cm <sup>-2</sup> ) | (Ns)   | RhoI<br>(cm <sup>-2</sup> ) | (Ni)  | Squares | U+/-2s  | Grain Age (Ma) |            |        |
|--------------|-----------------------------|--------|-----------------------------|-------|---------|---------|----------------|------------|--------|
|              |                             |        |                             |       |         |         | Age            | --95% CI-- |        |
| 1            | 2.61E+06                    | ( 26)  | 2.01E+05                    | ( 2)  | 12      | 36 46   | 211.0          | 57.3       | 1740.3 |
| 2            | 3.64E+06                    | ( 121) | 1.51E+05                    | ( 5)  | 40      | 27 23   | 402.0          | 175.8      | 1218.6 |
| 3            | 5.70E+06                    | ( 142) | 3.21E+05                    | ( 8)  | 30      | 58 40   | 300.7          | 153.0      | 701.5  |
| 4            | 5.22E+06                    | ( 39)  | 2.68E+05                    | ( 2)  | 9       | 48 61   | 313.3          | 88.6       | 2426.9 |
| 5            | 5.78E+06                    | ( 96)  | 5.42E+05                    | ( 9)  | 20      | 98 64   | 182.9          | 94.5       | 411.5  |
| 6            | 5.76E+06                    | ( 43)  | 1.20E+06                    | ( 9)  | 9       | 218 142 | 82.7           | 40.5       | 194.1  |
| 7            | 6.96E+06                    | ( 52)  | 1.20E+06                    | ( 9)  | 9       | 218 142 | 99.8           | 49.6       | 231.6  |
| 8            | 3.77E+06                    | ( 50)  | 4.52E+05                    | ( 6)  | 16      | 82 64   | 142.3          | 62.8       | 407.4  |
| 9            | 4.46E+06                    | ( 37)  | 3.61E+05                    | ( 3)  | 10      | 65 70   | 204.6          | 68.6       | 1020.2 |
| 10           | 7.71E+06                    | ( 192) | 1.29E+06                    | ( 32) | 30      | 233 82  | 104.7          | 72.2       | 157.6  |
| 11           | 6.96E+06                    | ( 52)  | 9.37E+05                    | ( 7)  | 9       | 170 124 | 127.4          | 59.1       | 333.9  |
| 12           | 5.34E+06                    | ( 93)  | 9.75E+05                    | ( 17) | 21      | 177 85  | 95.2           | 57.0       | 170.8  |
| 13           | 3.09E+06                    | ( 77)  | 4.42E+05                    | ( 11) | 30      | 80 47   | 121.0          | 65.1       | 253.2  |
| 14           | 6.27E+06                    | ( 156) | 7.63E+05                    | ( 19) | 30      | 138 63  | 142.4          | 89.2       | 243.0  |
| 15           | 4.96E+06                    | ( 247) | 5.02E+05                    | ( 25) | 60      | 91 36   | 171.3          | 114.4      | 269.6  |
| 16           | 6.57E+06                    | ( 229) | 1.41E+06                    | ( 49) | 42      | 255 73  | 81.9           | 60.1       | 114.0  |
| 17           | 5.22E+06                    | ( 52)  | 1.10E+06                    | ( 11) | 12      | 200 118 | 82.1           | 42.9       | 175.3  |
| 18           | 3.09E+06                    | ( 77)  | 4.42E+05                    | ( 11) | 30      | 80 47   | 121.0          | 65.1       | 253.2  |
| 19           | 5.14E+06                    | ( 427) | 8.43E+05                    | ( 70) | 100     | 153 37  | 106.2          | 82.5       | 136.6  |
| 20           | 3.42E+06                    | ( 142) | 3.37E+05                    | ( 14) | 50      | 61 32   | 175.0          | 102.5      | 328.0  |
| 21           | 8.70E+06                    | ( 65)  | 5.35E+05                    | ( 4)  | 9       | 97 91   | 271.0          | 106.0      | 1003.6 |
| 22           | 2.69E+06                    | ( 67)  | 6.83E+05                    | ( 17) | 30      | 124 59  | 68.8           | 40.3       | 125.4  |
| 23           | 4.12E+06                    | ( 171) | 4.34E+05                    | ( 18) | 50      | 79 37   | 164.4          | 102.2      | 283.9  |
| 24           | 3.84E+06                    | ( 134) | 4.88E+05                    | ( 17) | 42      | 88 42   | 136.7          | 83.2       | 241.8  |
| 25           | 2.80E+06                    | ( 58)  | 6.27E+05                    | ( 13) | 25      | 113 62  | 77.6           | 42.5       | 155.1  |
| 26           | 7.63E+06                    | ( 57)  | 1.07E+06                    | ( 8)  | 9       | 194 133 | 122.6          | 59.5       | 298.7  |
| 27           | 5.87E+06                    | ( 78)  | 1.28E+06                    | ( 17) | 16      | 232 111 | 80.0           | 47.3       | 144.7  |
| 28           | 2.91E+06                    | ( 58)  | 2.01E+05                    | ( 4)  | 24      | 36 34   | 242.4          | 94.1       | 905.7  |
| 29           | 4.29E+06                    | ( 57)  | 8.28E+05                    | ( 11) | 16      | 150 89  | 89.9           | 47.3       | 190.9  |
| 30           | 1.61E+06                    | ( 40)  | 1.61E+05                    | ( 4)  | 30      | 29 27   | 168.4          | 63.6       | 646.8  |
| 31           | 2.09E+06                    | ( 26)  | 1.61E+05                    | ( 2)  | 15      | 29 37   | 211.0          | 57.3       | 1740.3 |
| 32           | 2.13E+06                    | ( 53)  | 1.61E+05                    | ( 4)  | 30      | 29 27   | 222.0          | 85.7       | 834.8  |
| 33           | 5.85E+06                    | ( 102) | 1.09E+06                    | ( 19) | 21      | 197 90  | 93.5           | 57.5       | 162.1  |
| 34           | 8.99E+06                    | ( 179) | 1.56E+06                    | ( 31) | 24      | 282 101 | 100.8          | 69.0       | 153.0  |
| 35           | 5.92E+06                    | ( 59)  | 5.02E+05                    | ( 5)  | 12      | 91 78   | 199.5          | 83.9       | 633.9  |
| 36           | 2.77E+06                    | ( 46)  | 6.02E+05                    | ( 10) | 20      | 109 67  | 79.8           | 40.3       | 178.3  |
| 37           | 5.66E+06                    | ( 169) | 1.04E+06                    | ( 31) | 36      | 188 67  | 95.2           | 65.0       | 144.7  |
| 38           | 4.30E+06                    | ( 107) | 3.61E+05                    | ( 9)  | 30      | 65 43   | 203.4          | 105.7      | 455.7  |
| 39           | 7.53E+06                    | ( 75)  | 1.31E+06                    | ( 13) | 12      | 236 129 | 100.1          | 55.9       | 197.4  |
| 40           | 4.15E+06                    | ( 62)  | 2.68E+05                    | ( 4)  | 18      | 48 46   | 258.8          | 100.9      | 961.8  |
| 41           | 3.82E+06                    | ( 57)  | 3.35E+05                    | ( 5)  | 18      | 61 52   | 192.8          | 80.9       | 614.2  |
| 42           | 4.19E+06                    | ( 327) | 4.74E+05                    | ( 37) | 94      | 86 28   | 153.7          | 109.9      | 222.1  |
| 43           | 1.93E+06                    | ( 32)  | 3.01E+05                    | ( 5)  | 20      | 55 47   | 109.2          | 43.6       | 361.6  |
| 44           | 1.00E+07                    | ( 75)  | 2.01E+06                    | ( 15) | 9       | 364 185 | 87.0           | 50.1       | 163.7  |
| 45           | 2.71E+06                    | ( 36)  | 3.77E+05                    | ( 5)  | 16      | 68 58   | 122.6          | 49.6       | 402.7  |
| 46           | 2.29E+06                    | ( 95)  | 1.93E+05                    | ( 8)  | 50      | 35 24   | 202.8          | 101.4      | 481.9  |
| 47           | 5.16E+06                    | ( 214) | 7.95E+05                    | ( 33) | 50      | 144 50  | 113.1          | 78.6       | 168.7  |
| 48           | 3.77E+06                    | ( 50)  | 1.51E+05                    | ( 2)  | 16      | 27 35   | 398.7          | 115.0      | 2955.6 |
| 49           | 6.93E+06                    | ( 115) | 4.22E+05                    | ( 7)  | 20      | 76 56   | 278.1          | 135.0      | 699.3  |
| 50           | 4.42E+06                    | ( 33)  | 1.34E+05                    | ( 1)  | 9       | 24 40   | 492.1          | 96.9       | 9950.2 |
| 51           | 3.68E+06                    | ( 110) | 4.35E+05                    | ( 13) | 36      | 79 43   | 146.2          | 83.3       | 283.6  |
| 52           | 2.33E+06                    | ( 116) | 1.81E+05                    | ( 9)  | 60      | 33 21   | 220.2          | 114.8      | 491.7  |
| 53           | 8.51E+06                    | ( 113) | 9.04E+05                    | ( 12) | 16      | 164 93  | 162.4          | 90.9       | 323.6  |

| Grain<br>no. | RhoS<br>(cm <sup>-2</sup> ) | (Ns)    | RhoI<br>(cm <sup>-2</sup> ) | (Ni)    | Squares | U+/-2s  | Grain Age (Ma) |            |        |
|--------------|-----------------------------|---------|-----------------------------|---------|---------|---------|----------------|------------|--------|
|              |                             |         |                             |         |         |         | Age            | --95% CI-- |        |
| 54           | 3.35E+06                    | ( 25)   | 1.47E+06                    | ( 11)   | 9       | 267 157 | 39.7           | 19.0       | 89.9   |
| 55           | 1.81E+06                    | ( 60)   | 2.41E+05                    | ( 8)    | 40      | 44 30   | 129.0          | 62.8       | 313.4  |
| 56           | 5.06E+06                    | ( 294)  | 4.82E+05                    | ( 28)   | 70      | 87 33   | 182.0          | 124.4      | 278.3  |
| 57           | 7.52E+06                    | ( 624)  | 1.28E+06                    | ( 106)  | 100     | 231 45  | 102.7          | 83.5       | 126.4  |
| 58           | 9.42E+06                    | ( 391)  | 1.40E+06                    | ( 58)   | 50      | 253 66  | 117.1          | 88.9       | 154.0  |
| 59           | 7.36E+06                    | ( 55)   | 6.69E+05                    | ( 5)    | 9       | 121 103 | 186.2          | 77.9       | 594.3  |
| 60           | 5.66E+06                    | ( 188)  | 7.23E+05                    | ( 24)   | 40      | 131 53  | 136.2          | 89.6       | 217.9  |
| 61           | 3.68E+06                    | ( 214)  | 6.37E+05                    | ( 37)   | 70      | 115 38  | 101.1          | 71.4       | 147.5  |
| 62           | 5.31E+06                    | ( 216)  | 7.62E+05                    | ( 31)   | 49      | 138 49  | 121.4          | 83.6       | 183.2  |
| 63           | 8.63E+06                    | ( 86)   | 1.10E+06                    | ( 11)   | 12      | 200 118 | 135.0          | 73.0       | 281.0  |
| 64           | 2.73E+06                    | ( 181)  | 5.42E+05                    | ( 36)   | 80      | 98 33   | 87.9           | 61.5       | 129.7  |
| 65           | 8.16E+06                    | ( 271)  | 7.83E+05                    | ( 26)   | 40      | 142 55  | 180.6          | 121.7      | 281.1  |
| 66           | 4.28E+06                    | ( 284)  | 3.61E+05                    | ( 24)   | 80      | 65 26   | 204.6          | 136.2      | 323.8  |
| 67           | 4.18E+06                    | ( 52)   | 5.62E+05                    | ( 7)    | 15      | 102 74  | 127.4          | 59.1       | 333.9  |
| 68           | 2.69E+06                    | ( 134)  | 3.41E+05                    | ( 17)   | 60      | 62 30   | 136.7          | 83.2       | 241.8  |
| 69           | 2.41E+06                    | ( 50)   | 1.45E+05                    | ( 3)    | 25      | 26 28   | 274.7          | 94.4       | 1329.8 |
| 70           | 7.53E+06                    | ( 250)  | 1.27E+06                    | ( 42)   | 40      | 229 71  | 104.0          | 75.1       | 148.0  |
| 71           | 3.73E+06                    | ( 93)   | 4.02E+05                    | ( 10)   | 30      | 73 45   | 160.0          | 84.9       | 344.8  |
| 72           | 4.02E+06                    | ( 30)   | 8.03E+05                    | ( 6)    | 9       | 145 114 | 85.9           | 36.1       | 254.7  |
| 73           | 4.82E+06                    | ( 280)  | 4.65E+05                    | ( 27)   | 70      | 84 32   | 179.8          | 122.0      | 277.3  |
| 74           | 4.63E+06                    | ( 192)  | 5.30E+05                    | ( 22)   | 50      | 96 41   | 151.4          | 98.2       | 247.3  |
| 75           | 3.03E+06                    | ( 151)  | 3.61E+05                    | ( 18)   | 60      | 65 30   | 145.4          | 90.0       | 252.1  |
| 76           | 4.93E+06                    | ( 368)  | 5.49E+05                    | ( 41)   | 90      | 99 31   | 156.2          | 113.6      | 221.1  |
| 77           | 3.18E+06                    | ( 264)  | 1.02E+06                    | ( 85)   | 100     | 185 40  | 54.4           | 42.5       | 69.5   |
| 78           | 4.88E+06                    | ( 405)  | 8.80E+05                    | ( 73)   | 100     | 159 37  | 96.7           | 75.3       | 124.0  |
| 79           | 7.92E+06                    | ( 657)  | 1.27E+06                    | ( 105)  | 100     | 229 45  | 109.1          | 88.7       | 134.2  |
| 80           | 6.46E+06                    | ( 193)  | 6.36E+05                    | ( 19)   | 36      | 115 52  | 175.7          | 110.8      | 297.9  |
| 81           | 6.70E+06                    | ( 139)  | 1.01E+06                    | ( 21)   | 25      | 183 79  | 115.2          | 73.1       | 192.2  |
| 82           | 3.37E+06                    | ( 28)   | 1.20E+06                    | ( 10)   | 10      | 218 135 | 48.8           | 23.3       | 113.2  |
| 83           | 6.31E+06                    | ( 262)  | 9.64E+05                    | ( 40)   | 50      | 175 55  | 114.3          | 82.2       | 163.8  |
| 84           | 2.37E+06                    | ( 63)   | 4.52E+05                    | ( 12)   | 32      | 82 46   | 91.1           | 49.4       | 186.4  |
| 85           | 6.59E+06                    | ( 547)  | 1.41E+06                    | ( 117)  | 100     | 255 48  | 81.8           | 66.8       | 100.0  |
| 86           | 3.13E+06                    | ( 260)  | 4.70E+05                    | ( 39)   | 100     | 85 27   | 116.4          | 83.3       | 167.5  |
| 87           | 3.04E+06                    | ( 252)  | 6.39E+05                    | ( 53)   | 100     | 116 32  | 83.3           | 61.9       | 114.4  |
| 88           | 5.30E+06                    | ( 220)  | 1.16E+06                    | ( 48)   | 50      | 209 60  | 80.3           | 58.7       | 112.3  |
| 89           | 7.08E+06                    | ( 147)  | 1.73E+06                    | ( 36)   | 25      | 314 104 | 71.5           | 49.6       | 106.2  |
| 90           | 5.35E+06                    | ( 160)  | 6.69E+05                    | ( 20)   | 36      | 121 54  | 138.9          | 87.9       | 233.6  |
| 91           | 6.18E+06                    | ( 154)  | 6.02E+05                    | ( 15)   | 30      | 109 55  | 177.2          | 105.7      | 324.0  |
| 92           | 6.67E+06                    | ( 554)  | 1.02E+06                    | ( 85)   | 100     | 185 40  | 113.5          | 90.3       | 142.7  |
| 93           | 3.36E+06                    | ( 209)  | 4.18E+05                    | ( 26)   | 75      | 76 29   | 139.8          | 93.5       | 219.0  |
| 94           | 6.73E+06                    | ( 335)  | 1.08E+06                    | ( 54)   | 60      | 196 53  | 107.7          | 80.9       | 143.4  |
| 95           | 5.88E+06                    | ( 244)  | 8.67E+05                    | ( 36)   | 50      | 157 52  | 118.2          | 83.6       | 172.9  |
| 96           | 3.15E+06                    | ( 157)  | 3.61E+05                    | ( 18)   | 60      | 65 30   | 151.1          | 93.7       | 261.7  |
| 97           | 7.43E+06                    | ( 259)  | 1.12E+06                    | ( 39)   | 42      | 203 65  | 115.9          | 83.0       | 166.8  |
| 98           | 7.45E+06                    | ( 99)   | 1.20E+06                    | ( 16)   | 16      | 218 108 | 107.5          | 63.8       | 195.9  |
| 99           | 6.96E+06                    | ( 52)   | 1.47E+06                    | ( 11)   | 9       | 267 157 | 82.1           | 42.9       | 175.3  |
| <hr/>        |                             |         |                             |         |         |         |                |            |        |
| POOLED       | 4.85E+06                    | (15535) | 7.15E+05                    | ( 2288) | 3856    | 129 6   | 118.9          | 112.3      | 125.8  |

CHI^2 PROBABILITY (%): 0.0

|                |                         |        |       |    |       |        |        |
|----------------|-------------------------|--------|-------|----|-------|--------|--------|
| POOLED AGE W/  | 68% CONF. INTERVAL(Ma): | 118.9, | 115.5 | -- | 122.4 | ( -3.4 | +3.5)  |
|                | 95% CONF. INTERVAL(Ma): |        |       | -- | 125.8 | ( -6.6 | +7.0)  |
| <br>           |                         |        |       |    |       |        |        |
| CENTRAL AGE W/ | 68% CONF. INTERVAL(Ma): | 123.5, | 118.4 | -- | 128.9 | ( -5.1 | +5.3)  |
|                | 95% CONF. INTERVAL(Ma): |        |       | -- | 134.2 | ( -9.8 | +10.7) |
|                | AGE DISPERSION (%):     | 27.3   |       |    |       |        |        |

*FIT OPTION: Best-fit peaks using the binomial model of Galbraith and Green*

**INITIAL GUESS FOR MODEL PARAMETERS (number of peaks to fit = 3)**

| Peak #. | Peak Age | Theta | Fraction(%) | Count |
|---------|----------|-------|-------------|-------|
| 1.      | 39.10    | 0.690 | 1.2         | 1.18  |
| 2.      | 118.90   | 0.872 | 35.8        | 35.43 |
| 3.      | 311.20   | 0.947 | 5.2         | 5.12  |

Total range for grain ages: 39.1 to 383.1 Ma  
 Number of active grains (Num. used for fit): 99  
 Number of removed grains: 0  
 Degrees of freedom for fit: 94  
 Average of the SE(Z)'s for the grains: 0.33  
 Estimated width of peaks in PD plot in Z units: 0.39

**PARAMETERS FOR BEST-FIT PEAKS**

\* Standard error for peak age includes group error

\* Peak width is for PD plot assuming a kernel factor = 0.60

| #. | Peak Age(Ma) | 68%CI          | 95%CI          | W(Z) | Frac(%) | SE, % | Count |
|----|--------------|----------------|----------------|------|---------|-------|-------|
| 1. | 55.6         | -7.1 ...+8.1   | -13.0 ...+16.9 | 0.18 | 1.8     | 1.8   | 1.8   |
| 2. | 104.9        | -4.0 ...+4.2   | -7.7 ...+8.3   | 0.23 | 56.4    | 8.4   | 55.8  |
| 3. | 170.5        | -10.3 ...+10.9 | -19.6 ...+22.1 | 0.33 | 41.7    | 8.3   | 41.3  |

Log-likelihood for best fit: -306.293  
 Chi-squared value for best fit: 103.646  
 Reduced chi-squared value: 1.103  
 Probability for F test: 0%  
 Condition number for COVAR matrix: 64.72  
 Number of iterations: 18

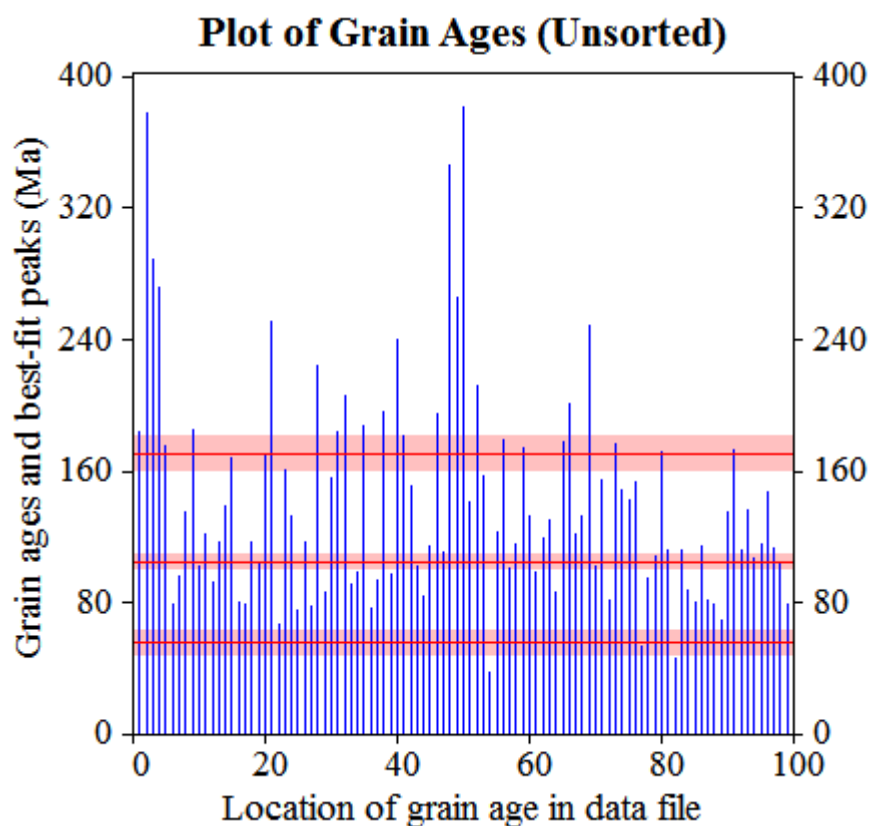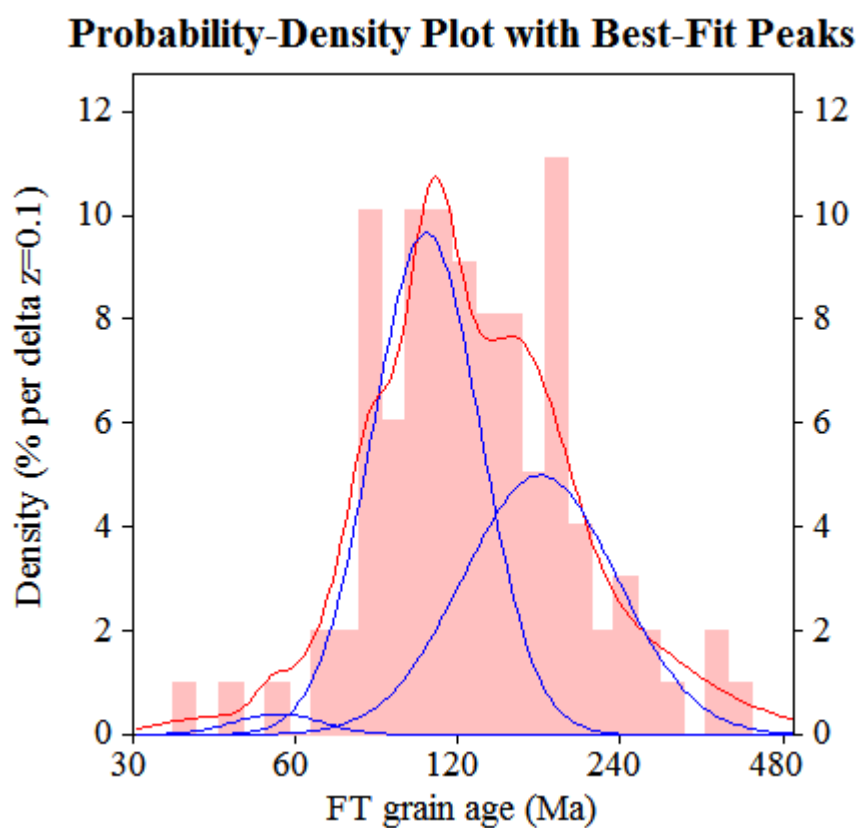

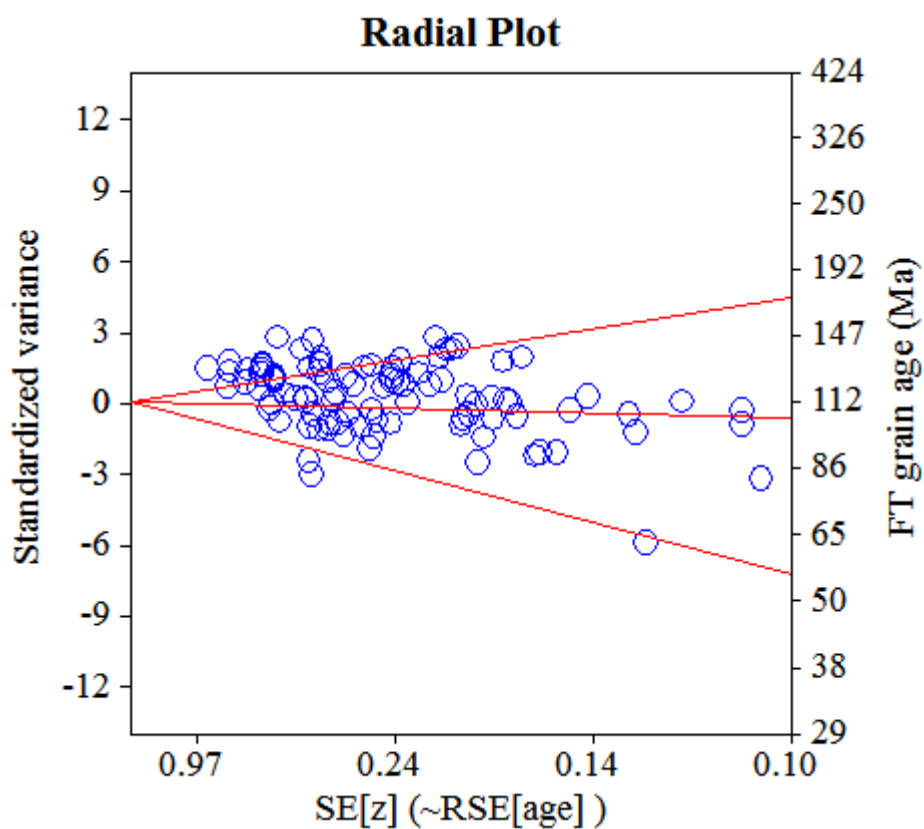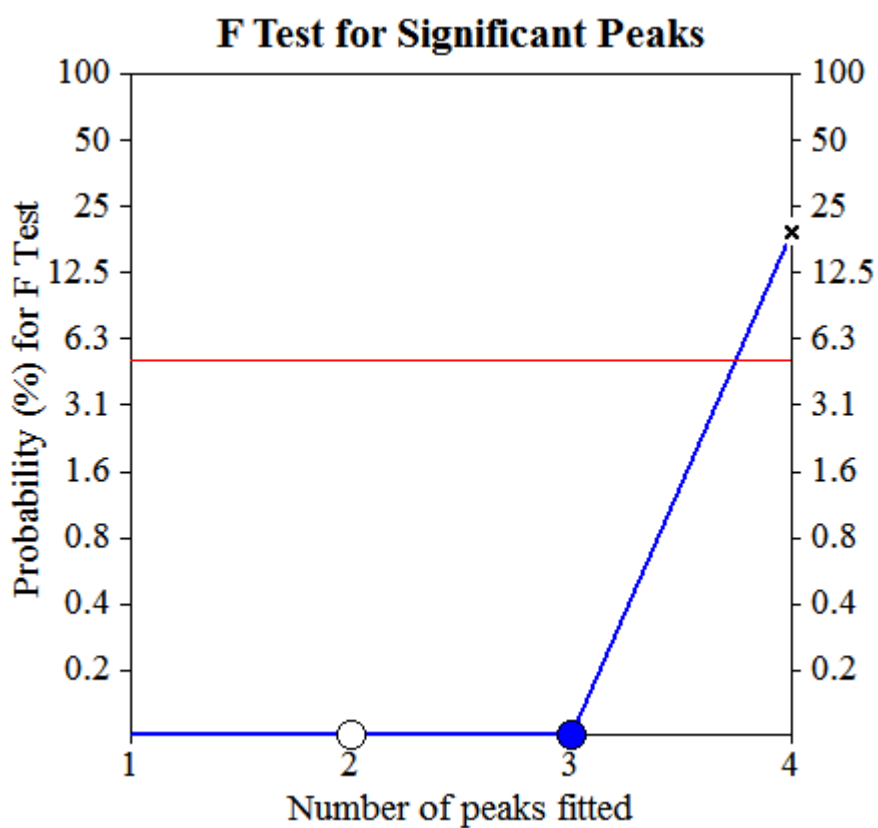

Datafile: C:\BH2\Edna\12-2015\EMP\_49\EMP\_49\_12\_2015\_22.ftz

Title: Sample No. EMP\_49 Irr 12-2015-22

**NEW PARAMETERS - ZETA METHOD**

EFFECTIVE TRACK DENSITY FOR FLUENCE MONITOR (tracks/cm<sup>2</sup>): 2,77E+05  
 RELATIVE ERROR (%): 1,23  
 EFFECTIVE URANIUM CONTENT OF MONITOR (ppm): 50,00  
 ZETA FACTOR AND STANDARD ERROR (yr cm<sup>2</sup>): 128,02 1,87  
 SIZE OF COUNTER SQUARE (cm<sup>2</sup>): 8,30E-07

**GRAIN AGES IN ORIGINAL ORDER**

| Grain no. | RhoS (cm <sup>-2</sup> ) | (Ns)   | RhoI (cm <sup>-2</sup> ) | (Ni)   | Squares | U+/-2s  | Grain Age (Ma) | Age   | --95% CI-- |
|-----------|--------------------------|--------|--------------------------|--------|---------|---------|----------------|-------|------------|
| 1         | 7,28E+06                 | ( 302) | 1,20E+06                 | ( 50)  | 50      | 217 61  | 106.1          | 78.7  | 146.2      |
| 2         | 6,60E+06                 | ( 274) | 1,37E+06                 | ( 57)  | 50      | 248 66  | 84.1           | 63.2  | 111.8      |
| 3         | 5,76E+06                 | ( 478) | 1,48E+06                 | ( 123) | 100     | 267 49  | 68.4           | 56.0  | 83.5       |
| 4         | 3,80E+06                 | ( 63)  | 6,02E+05                 | ( 10)  | 20      | 109 67  | 109.4          | 56.7  | 240.1      |
| 5         | 6,07E+06                 | ( 247) | 9,34E+05                 | ( 38)  | 49      | 168 54  | 114.0          | 81.2  | 165.0      |
| 6         | 4,73E+06                 | ( 165) | 4,02E+05                 | ( 14)  | 42      | 72 38   | 203.8          | 120.0 | 380.0      |
| 7         | 4,03E+06                 | ( 164) | 4,92E+05                 | ( 20)  | 49      | 89 39   | 143.0          | 90.6  | 240.3      |
| 8         | 9,04E+06                 | ( 225) | 1,37E+06                 | ( 34)  | 30      | 246 84  | 116.0          | 81.1  | 171.7      |
| 9         | 6,55E+06                 | ( 87)  | 9,04E+05                 | ( 12)  | 16      | 163 92  | 126.0          | 69.7  | 253.8      |
| 10        | 5,54E+06                 | ( 230) | 6,02E+05                 | ( 25)  | 50      | 109 43  | 160.4          | 106.9 | 252.9      |
| 11        | 5,24E+06                 | ( 87)  | 7,23E+05                 | ( 12)  | 20      | 130 74  | 126.0          | 69.7  | 253.8      |
| 12        | 8,07E+06                 | ( 134) | 1,81E+06                 | ( 30)  | 20      | 326 118 | 78.5           | 52.8  | 121.1      |
| 13        | 7,67E+06                 | ( 191) | 1,53E+06                 | ( 38)  | 30      | 275 89  | 88.3           | 62.4  | 128.8      |
| 14        | 5,75E+06                 | ( 191) | 7,53E+05                 | ( 25)  | 40      | 136 54  | 133.5          | 88.5  | 211.6      |
| 15        | 7,23E+06                 | ( 210) | 1,65E+06                 | ( 48)  | 35      | 298 86  | 77.0           | 56.2  | 107.8      |
| 16        | 8,29E+06                 | ( 344) | 1,40E+06                 | ( 58)  | 50      | 252 66  | 103.6          | 78.5  | 136.7      |
| 17        | 2,37E+06                 | ( 59)  | 2,41E+05                 | ( 6)   | 30      | 43 34   | 168.3          | 75.1  | 477.0      |
| 18        | 6,60E+06                 | ( 219) | 1,42E+06                 | ( 47)  | 40      | 255 74  | 82.0           | 59.8  | 115.0      |
| 19        | 2,74E+06                 | ( 91)  | 4,22E+05                 | ( 14)  | 40      | 76 40   | 113.3          | 65.0  | 215.9      |
| 20        | 8,06E+06                 | ( 107) | 1,43E+06                 | ( 19)  | 16      | 258 117 | 98.5           | 60.7  | 170.4      |
| 21        | 7,95E+06                 | ( 66)  | 8,43E+05                 | ( 7)   | 10      | 152 111 | 162.0          | 76.4  | 418.9      |
| 22        | 5,73E+06                 | ( 476) | 1,08E+06                 | ( 90)  | 100     | 195 41  | 92.7           | 73.9  | 116.2      |
| 23        | 4,56E+06                 | ( 265) | 1,41E+06                 | ( 82)  | 70      | 254 56  | 56.8           | 44.3  | 72.8       |
| 24        | 3,93E+06                 | ( 261) | 8,58E+05                 | ( 57)  | 80      | 155 41  | 80.1           | 60.2  | 106.6      |
| 25        | 7,11E+06                 | ( 118) | 1,39E+06                 | ( 23)  | 20      | 250 103 | 89.9           | 57.6  | 147.7      |
| 26        | 3,32E+06                 | ( 248) | 4,28E+05                 | ( 32)  | 90      | 77 27   | 135.6          | 94.2  | 202.6      |
| 27        | 4,82E+06                 | ( 168) | 1,15E+06                 | ( 40)  | 42      | 207 65  | 73.9           | 52.3  | 107.3      |
| 28        | 8,76E+06                 | ( 109) | 2,01E+06                 | ( 25)  | 15      | 362 144 | 76.6           | 49.5  | 123.7      |
| 29        | 7,20E+06                 | ( 299) | 1,57E+06                 | ( 65)  | 50      | 282 70  | 80.6           | 61.6  | 105.3      |
| 30        | 7,44E+06                 | ( 247) | 1,99E+06                 | ( 66)  | 40      | 358 88  | 65.6           | 50.0  | 86.1       |
| 31        | 4,22E+06                 | ( 210) | 4,42E+05                 | ( 22)  | 60      | 80 34   | 166.2          | 108.0 | 270.7      |
| 32        | 6,40E+06                 | ( 85)  | 1,20E+06                 | ( 16)  | 16      | 217 107 | 92.9           | 54.6  | 170.3      |
| 33        | 6,69E+06                 | ( 50)  | 1,47E+06                 | ( 11)  | 9       | 265 157 | 79.3           | 41.3  | 169.8      |
| 34        | 8,55E+06                 | ( 213) | 1,57E+06                 | ( 39)  | 30      | 282 90  | 95.9           | 68.3  | 138.8      |
| 35        | 6,90E+06                 | ( 573) | 1,06E+06                 | ( 88)  | 100     | 191 41  | 114.0          | 91.0  | 142.7      |
| 36        | 7,04E+06                 | ( 146) | 1,73E+06                 | ( 36)  | 25      | 313 104 | 71.4           | 49.5  | 106.0      |
| 37        | 4,50E+06                 | ( 112) | 2,81E+05                 | ( 7)   | 30      | 51 37   | 272.2          | 132.0 | 685.4      |
| 38        | 5,93E+06                 | ( 246) | 9,64E+05                 | ( 40)  | 50      | 174 55  | 107.9          | 77.4  | 154.9      |
| 39        | 6,51E+06                 | ( 216) | 1,51E+06                 | ( 50)  | 40      | 271 77  | 76.1           | 55.9  | 105.8      |
| 40        | 5,92E+06                 | ( 59)  | 1,51E+06                 | ( 15)  | 12      | 271 138 | 68.9           | 39.0  | 131.3      |
| 41        | 3,06E+06                 | ( 142) | 5,38E+05                 | ( 25)  | 56      | 97 38   | 99.5           | 65.2  | 159.2      |
| 42        | 9,12E+06                 | ( 227) | 1,37E+06                 | ( 34)  | 30      | 246 84  | 117.0          | 81.8  | 173.2      |
| 43        | 4,05E+06                 | ( 84)  | 6,75E+05                 | ( 14)  | 25      | 122 64  | 104.7          | 59.8  | 200.2      |
| 44        | 5,53E+06                 | ( 225) | 1,25E+06                 | ( 51)  | 49      | 226 63  | 77.7           | 57.3  | 107.6      |
| 45        | 6,14E+06                 | ( 255) | 1,57E+06                 | ( 65)  | 50      | 282 70  | 68.8           | 52.4  | 90.3       |
| 46        | 4,13E+06                 | ( 137) | 1,48E+06                 | ( 49)  | 40      | 266 76  | 49.4           | 35.5  | 70.0       |
| 47        | 2,30E+06                 | ( 153) | 4,82E+05                 | ( 32)  | 80      | 87 31   | 84.0           | 57.4  | 127.3      |
| 48        | 3,34E+06                 | ( 222) | 4,22E+05                 | ( 28)  | 80      | 76 29   | 138.6          | 94.0  | 213.3      |
| 49        | 6,10E+06                 | ( 76)  | 1,12E+06                 | ( 14)  | 15      | 203 107 | 94.8           | 53.8  | 182.1      |
| 50        | 7,13E+06                 | ( 142) | 1,26E+06                 | ( 25)  | 24      | 226 90  | 99.5           | 65.2  | 159.2      |
| 51        | 2,82E+06                 | ( 187) | 3,92E+05                 | ( 26)  | 80      | 71 27   | 125.8          | 83.8  | 197.7      |
| 52        | 8,03E+06                 | ( 80)  | 1,20E+06                 | ( 12)  | 12      | 217 123 | 116.0          | 63.8  | 234.5      |
| 53        | 8,76E+06                 | ( 218) | 1,20E+06                 | ( 30)  | 30      | 217 79  | 127.2          | 87.2  | 193.1      |



Datafile: C:\BH2\Edna\12-2015\EMP\_49\EMP\_49\_12\_2015\_22.ftz

Title: Sample No. EMP\_49 Irr 12-2015-22

| Grain<br>no. | RhoS<br>(cm <sup>-2</sup> ) | (Ns)            | RhoI<br>(cm <sup>-2</sup> ) | (Ni)  | Squares | U+/-2s  | Grain Age (Ma) |            |        |
|--------------|-----------------------------|-----------------|-----------------------------|-------|---------|---------|----------------|------------|--------|
|              |                             |                 |                             |       |         |         | Age            | --95% CI-- |        |
| 54           | 1,54E+06                    | ( 46)           | 1,67E+05                    | ( 5)  | 36      | 30 26   | 156.9          | 64.8       | 506.6  |
| 55           | 3,33E+06                    | ( 69)           | 3,37E+05                    | ( 7)  | 25      | 61 44   | 169.2          | 80.0       | 436.6  |
| 56           | 2,71E+06                    | ( 90)           | 4,52E+05                    | ( 15) | 40      | 81 41   | 104.7          | 61.0       | 195.3  |
| 57           | 4,82E+06                    | ( 64)           | 8,28E+05                    | ( 11) | 16      | 149 88  | 101.3          | 53.8       | 213.8  |
| 58           | 2,31E+06                    | ( 94)           | 4,43E+05                    | ( 18) | 49      | 80 37   | 91.4           | 55.3       | 161.3  |
| 59           | 3,33E+06                    | ( 83)           | 4,82E+05                    | ( 12) | 30      | 87 49   | 120.3          | 66.3       | 242.7  |
| 60           | 3,13E+06                    | ( 78)           | 7,63E+05                    | ( 19) | 30      | 138 62  | 72.0           | 43.5       | 126.3  |
| 61           | 2,81E+06                    | ( 28)           | 9,04E+05                    | ( 9)  | 12      | 163 106 | 54.3           | 25.3       | 131.8  |
| 62           | 7,98E+06                    | ( 265)          | 1,48E+06                    | ( 49) | 40      | 266 76  | 95.1           | 70.1       | 131.8  |
| 63           | 3,10E+06                    | ( 103)          | 5,12E+05                    | ( 17) | 40      | 92 44   | 105.9          | 63.7       | 189.1  |
| 64           | 3,34E+06                    | ( 111)          | 6,63E+05                    | ( 22) | 40      | 119 50  | 88.4           | 56.0       | 147.1  |
| 65           | 7,15E+06                    | ( 178)          | 1,24E+06                    | ( 31) | 30      | 224 80  | 100.7          | 68.9       | 152.8  |
| 66           | 6,48E+06                    | ( 538)          | 1,05E+06                    | ( 87) | 100     | 189 41  | 108.3          | 86.3       | 135.8  |
| 67           | 3,31E+06                    | ( 44)           | 1,51E+05                    | ( 2)  | 16      | 27 34   | 353.9          | 101.1      | 2682.8 |
| 68           | 5,37E+06                    | ( 312)          | 1,27E+06                    | ( 74) | 70      | 230 53  | 73.9           | 57.4       | 95.3   |
| 69           | 7,15E+06                    | ( 178)          | 1,24E+06                    | ( 31) | 30      | 224 80  | 100.7          | 68.9       | 152.8  |
| 70           | 6,48E+06                    | ( 538)          | 1,05E+06                    | ( 87) | 100     | 189 41  | 108.3          | 86.3       | 135.8  |
| 71           | 3,31E+06                    | ( 44)           | 1,51E+05                    | ( 2)  | 16      | 27 34   | 353.9          | 101.1      | 2682.8 |
| 72           | 5,37E+06                    | ( 312)          | 1,27E+06                    | ( 74) | 70      | 230 53  | 73.9           | 57.4       | 95.3   |
| 73           | 5,11E+06                    | ( 178)          | 1,15E+06                    | ( 40) | 42      | 207 65  | 78.3           | 55.5       | 113.4  |
| 74           | 5,37E+06                    | ( 223)          | 5,30E+05                    | ( 22) | 50      | 96 40   | 176.3          | 114.8      | 286.8  |
| 75           | 5,54E+06                    | ( 138)          | 9,64E+05                    | ( 24) | 30      | 174 70  | 100.7          | 65.5       | 162.8  |
| 76           | 5,14E+06                    | ( 128)          | 8,03E+05                    | ( 20) | 30      | 145 64  | 111.9          | 70.2       | 189.6  |
| 77           | 5,54E+06                    | ( 184)          | 1,11E+06                    | ( 37) | 40      | 201 66  | 87.4           | 61.4       | 128.2  |
| 78           | 7,35E+06                    | ( 305)          | 1,01E+06                    | ( 42) | 50      | 182 56  | 127.3          | 92.4       | 180.2  |
| 79           | 1,69E+06                    | ( 42)           | 3,61E+05                    | ( 9)  | 30      | 65 42   | 81.2           | 39.6       | 190.8  |
| 80           | 2,83E+06                    | ( 188)          | 6,02E+05                    | ( 40) | 80      | 109 34  | 82.7           | 58.7       | 119.5  |
| 81           | 4,92E+06                    | ( 143)          | 8,26E+05                    | ( 24) | 35      | 149 60  | 104.4          | 67.9       | 168.4  |
| 82           | 2,21E+06                    | ( 33)           | 1,34E+05                    | ( 2)  | 18      | 24 31   | 267.5          | 74.5       | 2127.5 |
| 83           | 7,08E+06                    | ( 94)           | 8,28E+05                    | ( 11) | 16      | 149 88  | 148.1          | 80.5       | 307.1  |
| 84           | 5,35E+06                    | ( 71)           | 9,04E+05                    | ( 12) | 16      | 163 92  | 103.1          | 56.3       | 209.5  |
| 85           | 9,49E+06                    | ( 126)          | 2,64E+06                    | ( 35) | 16      | 475 160 | 63.4           | 43.5       | 95.2   |
| 86           | 8,18E+06                    | ( 285)          | 2,67E+06                    | ( 93) | 42      | 481 100 | 53.9           | 42.6       | 68.2   |
| 87           | 7,68E+06                    | ( 255)          | 1,72E+06                    | ( 57) | 40      | 309 82  | 78.3           | 58.8       | 104.3  |
| 88           | 2,94E+06                    | ( 171)          | 2,58E+05                    | ( 15) | 70      | 47 24   | 197.4          | 118.2      | 359.6  |
| 89           | 7,93E+06                    | ( 79)           | 1,81E+06                    | ( 18) | 12      | 326 152 | 76.9           | 46.1       | 136.8  |
| 90           | 6,35E+06                    | ( 369)          | 1,36E+06                    | ( 79) | 70      | 245 55  | 81.9           | 64.2       | 104.5  |
| 91           | 2,82E+06                    | ( 164)          | 4,48E+05                    | ( 26) | 70      | 81 31   | 110.5          | 73.3       | 174.3  |
| 92           | 3,90E+06                    | ( 97)           | 4,82E+05                    | ( 12) | 30      | 87 49   | 140.3          | 78.0       | 281.3  |
| 93           | 5,79E+06                    | ( 202)          | 1,69E+06                    | ( 59) | 42      | 305 79  | 60.0           | 44.9       | 80.2   |
| 94           | 8,19E+06                    | ( 204)          | 2,17E+06                    | ( 54) | 30      | 391 106 | 66.6           | 49.2       | 91.8   |
| 95           | 6,53E+06                    | ( 271)          | 1,42E+06                    | ( 59) | 50      | 256 67  | 80.4           | 60.7       | 106.5  |
| 96           | 5,23E+06                    | ( 152)          | 9,64E+05                    | ( 28) | 35      | 174 65  | 95.2           | 63.7       | 148.3  |
| 97           | 5,49E+06                    | ( 114)          | 1,35E+06                    | ( 28) | 25      | 243 91  | 71.6           | 47.3       | 112.7  |
| POOLED       |                             | 5,30E+06(17574) | 9,99E+05( 3314)             |       | 3996    | 180 8   | 93.5           | 88.7       | 98.5   |

CHI^2 PROBABILITY (%): 0.0

|                |                         |       |         |                    |
|----------------|-------------------------|-------|---------|--------------------|
| POOLED AGE W/  | 68% CONF. INTERVAL(Ma): | 93.5, | 91.0 -- | 96.0 ( -2.5 +2.5)  |
|                | 95% CONF. INTERVAL(Ma): |       | 88.7 -- | 98.5 ( -4.8 +5.0)  |
| CENTRAL AGE W/ | 68% CONF. INTERVAL(Ma): | 95.7, | 92.2 -- | 99.3 ( -3.4 +3.6)  |
|                | 95% CONF. INTERVAL(Ma): |       | 89.1 -- | 102.8 ( -6.6 +7.1) |
|                | AGE DISPERSION (%):     | 23.2  |         |                    |

*FIT OPTION: Best-fit peaks using the binomial model of Galbraith and Green*

**INITIAL GUESS FOR MODEL PARAMETERS (number of peaks to fit = 3)**

| Peak #. | Peak Age | Theta | Fraction(%) | Count |
|---------|----------|-------|-------------|-------|
| 1.      | 93.50    | 0.841 | 41.1        | 39.89 |
| 2.      | 109.40   | 0.861 | 41.8        | 40.50 |
| 3.      | 139.60   | 0.888 | 18.9        | 18.33 |

Total range for grain ages: 49,1 to 308,6 Ma  
 Number of active grains (Num. used for fit): 97  
 Number of removed grains: 0  
 Degrees of freedom for fit: 92  
 Average of the SE(Z)'s for the grains: 0,25  
 Estimated width of peaks in PD plot in Z units: 0,3

**PARAMETERS FOR BEST-FIT PEAKS**

\* Standard error for peak age includes group error

\* Peak width is for PD plot assuming a kernel factor = 0.60

| #. | Peak Age(Ma) | 68%CI          | 95%CI          | W(Z) | Frac(%) | SE,% | Count |
|----|--------------|----------------|----------------|------|---------|------|-------|
| 1. | 74.4         | -3,5 ...+3,7   | -6,7 ...+7,4   | 0.19 | 37.1    | 10.7 | 35.9  |
| 2. | 107.4        | -7,2 ...+7,7   | -13,6 ...+15,6 | 0.23 | 52.8    | 11.5 | 51.3  |
| 3. | 158.4        | -25,8 ...+30,7 | -46,6 ...+65,6 | 0.31 | 10.1    | 9.0  | 9.8   |

Log-likelihood for best fit: -331,339  
 Chi-squared value for best fit: 97,246  
 Reduced chi-squared value: 1,057  
 Probability for F test: 0%  
 Condition number for COVAR matrix: 41,65  
 Number of iterations: 22



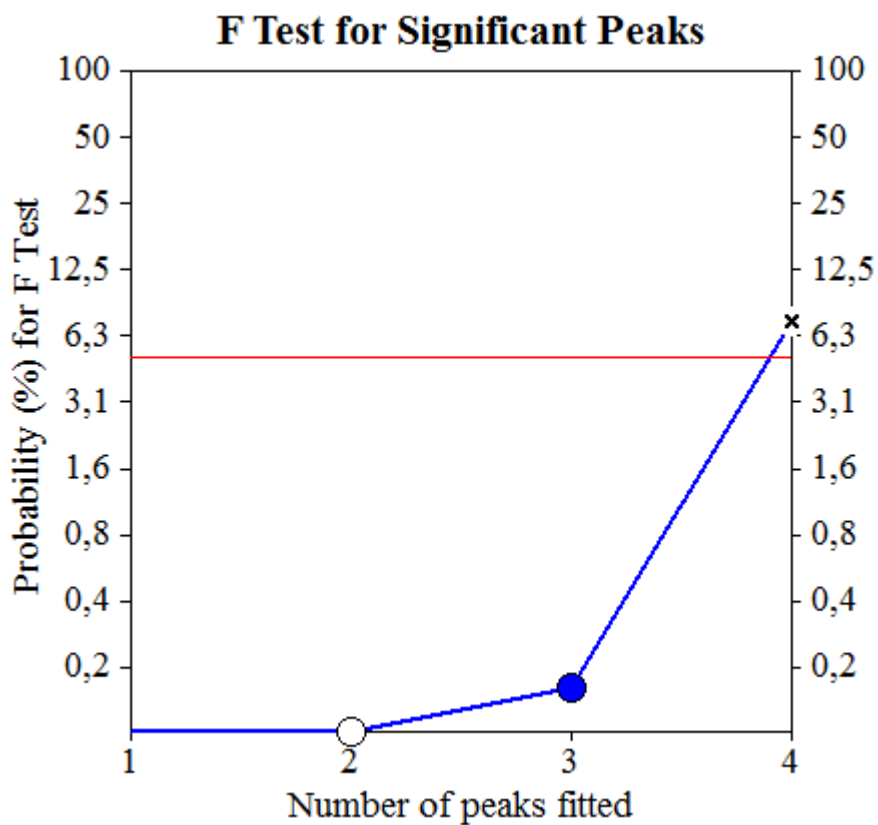

Datafile: C:\BH2\Alejandro\AFT\11-2015\AP\_045\AP\_045.ftz

Title: AP\_045 Irr 11-2015-9

## NEW PARAMETERS - ZETA METHOD

EFFECTIVE TRACK DENSITY FOR FLUENCE MONITOR (tracks/cm<sup>2</sup>): 1,01E+06

RELATIVE ERROR (%): 1,16

EFFECTIVE URANIUM CONTENT OF MONITOR (ppm): 15,00

ZETA FACTOR AND STANDARD ERROR (yr cm<sup>2</sup>): 284,52 5,65SIZE OF COUNTER SQUARE (cm<sup>2</sup>): 6,39E-07

## GRAIN AGES IN ORIGINAL ORDER

| Grain<br>no. | RhoS<br>(cm <sup>-2</sup> ) | (Ns)  | RhoI<br>(cm <sup>-2</sup> ) | (Ni)   | Squares | U+/-2s | Grain Age (Ma) |       |       |
|--------------|-----------------------------|-------|-----------------------------|--------|---------|--------|----------------|-------|-------|
|              |                             |       |                             |        |         |        | Age            | --95% | CI--  |
| 1            | 1,56E+05                    | ( 6)  | 3,13E+05                    | ( 12)  | 60      | 5 3    | 72.3           | 22.0  | 203.3 |
| 2            | 9,39E+04                    | ( 3)  | 2,19E+05                    | ( 7)   | 50      | 3 2    | 63.0           | 10.2  | 263.8 |
| 3            | 1,88E+05                    | ( 12) | 5,01E+05                    | ( 32)  | 100     | 7 3    | 54.0           | 25.2  | 106.4 |
| 4            | 2,35E+05                    | ( 15) | 7,36E+05                    | ( 47)  | 100     | 11 3   | 45.9           | 23.7  | 82.8  |
| 5            | 1,25E+05                    | ( 4)  | 1,56E+05                    | ( 5)   | 50      | 2 2    | 114.6          | 22.7  | 512.3 |
| 6            | 1,17E+05                    | ( 6)  | 2,15E+05                    | ( 11)  | 80      | 3 2    | 78.7           | 23.7  | 226.8 |
| 7            | 7,82E+04                    | ( 3)  | 2,09E+05                    | ( 8)   | 60      | 3 2    | 55.3           | 9.2   | 220.3 |
| 8            | 3,35E+05                    | ( 15) | 1,12E+06                    | ( 50)  | 70      | 17 5   | 43.2           | 22.4  | 77.4  |
| 9            | 1,96E+05                    | ( 10) | 3,52E+05                    | ( 18)  | 80      | 5 2    | 79.8           | 32.8  | 179.6 |
| 10           | 2,19E+05                    | ( 7)  | 5,63E+05                    | ( 18)  | 50      | 8 4    | 56.3           | 19.7  | 138.5 |
| 11           | 6,96E+05                    | ( 16) | 2,22E+06                    | ( 51)  | 36      | 33 9   | 45.2           | 23.9  | 79.7  |
| 12           | 1,10E+05                    | ( 7)  | 2,50E+05                    | ( 16)  | 100     | 4 2    | 63.2           | 21.8  | 159.3 |
| 13           | 2,90E+05                    | ( 10) | 8,40E+05                    | ( 29)  | 54      | 13 5   | 49.8           | 21.5  | 103.6 |
| 14           | 1,88E+05                    | ( 12) | 4,54E+05                    | ( 29)  | 100     | 7 2    | 59.5           | 27.5  | 118.9 |
| 15           | 1,88E+05                    | ( 12) | 4,69E+05                    | ( 30)  | 100     | 7 3    | 57.6           | 26.7  | 114.4 |
| 16           | 4,69E+04                    | ( 3)  | 9,39E+04                    | ( 6)   | 100     | 1 1    | 73.1           | 11.6  | 327.4 |
| 17           | 9,39E+04                    | ( 6)  | 2,82E+05                    | ( 18)  | 100     | 4 2    | 48.5           | 15.5  | 124.6 |
| 18           | 1,56E+04                    | ( 1)  | 4,69E+04                    | ( 3)   | 100     | 1 1    | 51.9           | 0.9   | 569.6 |
| 19           | 1,56E+05                    | ( 4)  | 4,69E+05                    | ( 12)  | 40      | 7 4    | 48.9           | 11.2  | 155.9 |
| 20           | 8,94E+04                    | ( 4)  | 2,46E+05                    | ( 11)  | 70      | 4 2    | 53.2           | 12.1  | 173.7 |
| 21           | 9,78E+04                    | ( 5)  | 6,85E+05                    | ( 35)  | 80      | 10 3   | 21.0           | 6.3   | 52.3  |
| 22           | 1,37E+05                    | ( 7)  | 4,30E+05                    | ( 22)  | 80      | 6 3    | 46.2           | 16.4  | 109.7 |
| 23           | 1,72E+05                    | ( 11) | 5,01E+05                    | ( 32)  | 100     | 7 3    | 49.6           | 22.4  | 99.6  |
| 24           | 5,63E+05                    | ( 18) | 1,82E+06                    | ( 58)  | 50      | 27 7   | 44.6           | 24.6  | 76.2  |
| 25           | 1,17E+05                    | ( 6)  | 5,48E+05                    | ( 28)  | 80      | 8 3    | 31.3           | 10.4  | 75.2  |
| 26           | 3,76E+05                    | ( 24) | 1,82E+06                    | ( 116) | 100     | 27 5   | 29.8           | 18.2  | 46.2  |
| 27           | 6,26E+04                    | ( 2)  | 1,56E+05                    | ( 5)   | 50      | 2 2    | 59.6           | 5.5   | 341.3 |
| 28           | 3,76E+05                    | ( 12) | 7,82E+05                    | ( 25)  | 50      | 12 5   | 69.0           | 31.4  | 140.7 |
| 29           | 9,39E+04                    | ( 3)  | 1,88E+05                    | ( 6)   | 50      | 3 2    | 73.1           | 11.6  | 327.4 |
| 30           | 1,17E+05                    | ( 6)  | 3,91E+05                    | ( 20)  | 80      | 6 3    | 43.7           | 14.1  | 110.2 |
| 31           | 2,19E+05                    | ( 14) | 7,82E+05                    | ( 50)  | 100     | 12 3   | 40.4           | 20.5  | 73.4  |
| 32           | 1,30E+05                    | ( 5)  | 3,39E+05                    | ( 13)  | 60      | 5 3    | 56.0           | 15.4  | 162.9 |
| 33           | 6,26E+04                    | ( 4)  | 3,44E+05                    | ( 22)  | 100     | 5 2    | 26.9           | 6.5   | 76.4  |
| 34           | 1,04E+05                    | ( 4)  | 4,69E+05                    | ( 18)  | 60      | 7 3    | 32.8           | 7.8   | 96.1  |
| 35           | 2,61E+05                    | ( 6)  | 9,13E+05                    | ( 21)  | 36      | 14 6   | 41.6           | 13.5  | 104.2 |
| 36           | 1,41E+05                    | ( 9)  | 5,16E+05                    | ( 33)  | 100     | 8 3    | 39.5           | 16.4  | 83.1  |
| 37           | 2,03E+05                    | ( 13) | 1,22E+06                    | ( 78)  | 100     | 18 4   | 24.1           | 12.2  | 43.2  |
| 38           | 9,39E+05                    | ( 54) | 2,07E+06                    | ( 119) | 90      | 31 6   | 64.9           | 46.1  | 89.9  |
| 39           | 4,69E+04                    | ( 3)  | 2,82E+05                    | ( 18)  | 100     | 4 2    | 24.9           | 4.5   | 81.4  |
| 40           | 4,07E+05                    | ( 13) | 1,44E+06                    | ( 46)  | 50      | 21 6   | 40.8           | 20.0  | 75.9  |
| 41           | 6,52E+05                    | ( 15) | 3,65E+06                    | ( 84)  | 36      | 54 12  | 25.8           | 13.7  | 44.6  |
| 42           | 9,39E+04                    | ( 6)  | 5,63E+05                    | ( 36)  | 100     | 8 3    | 24.4           | 8.2   | 57.0  |
| 43           | 4,69E+04                    | ( 3)  | 1,41E+05                    | ( 9)   | 100     | 2 1    | 49.3           | 8.3   | 188.8 |
| 44           | 3,13E+04                    | ( 2)  | 3,44E+05                    | ( 22)  | 100     | 5 2    | 13.9           | 1.5   | 52.8  |
| 45           | 4,47E+04                    | ( 2)  | 3,13E+05                    | ( 14)  | 70      | 5 2    | 21.8           | 2.3   | 88.6  |
| 46           | 4,56E+05                    | ( 14) | 2,18E+06                    | ( 67)  | 48      | 33 8   | 30.2           | 15.5  | 53.7  |
| 47           | 1,41E+05                    | ( 9)  | 2,97E+05                    | ( 19)  | 100     | 4 2    | 68.2           | 27.0  | 155.7 |
| 48           | 1,25E+05                    | ( 8)  | 4,07E+05                    | ( 26)  | 100     | 6 2    | 44.6           | 17.2  | 99.6  |
| 49           | 8,94E+04                    | ( 4)  | 8,72E+05                    | ( 39)  | 70      | 13 4   | 15.2           | 3.8   | 40.7  |
| 50           | 1,10E+05                    | ( 7)  | 2,97E+05                    | ( 19)  | 100     | 4 2    | 53.4           | 18.7  | 130.0 |
| 51           | 4,54E+05                    | ( 29) | 2,43E+06                    | ( 155) | 100     | 36 6   | 26.9           | 17.4  | 40.0  |
| 52           | 8,94E+04                    | ( 4)  | 1,56E+05                    | ( 7)   | 70      | 2 2    | 82.8           | 17.6  | 314.6 |
| 53           | 1,56E+05                    | ( 9)  | 4,35E+05                    | ( 25)  | 90      | 6 3    | 52.0           | 21.2  | 113.4 |
| 54           | 4,69E+04                    | ( 3)  | 5,63E+05                    | ( 36)  | 100     | 8 3    | 12.5           | 2.4   | 37.7  |

Datafile: C:\BH2\Alejandro\AFT\11-2015\AP\_045\AP\_045.ftz

Title: AP\_045 Irr 11-2015-9

| Grain<br>no. | RhoS<br>(cm <sup>-2</sup> ) | (Ns)   | RhoI<br>(cm <sup>-2</sup> ) | (Ni)    | Squares | U+/-2s | Grain Age (Ma) |            |       |
|--------------|-----------------------------|--------|-----------------------------|---------|---------|--------|----------------|------------|-------|
|              |                             |        |                             |         |         |        | Age            | --95% CI-- |       |
| 55           | 3,13E+04                    | ( 1)   | 5,01E+05                    | ( 16)   | 50      | 7 4    | 10.2           | 0.2        | 57.5  |
| 56           | 2,09E+05                    | ( 8)   | 2,87E+05                    | ( 11)   | 60      | 4 3    | 104.0          | 36.3       | 278.7 |
| 57           | 7,82E+04                    | ( 5)   | 1,22E+06                    | ( 78)   | 100     | 18 4   | 9.5            | 2.9        | 22.4  |
| 58           | 1,96E+05                    | ( 6)   | 3,59E+05                    | ( 11)   | 48      | 5 3    | 78.7           | 23.7       | 226.8 |
| 59           | 9,78E+04                    | ( 5)   | 2,35E+05                    | ( 12)   | 80      | 3 2    | 60.6           | 16.5       | 179.8 |
| 60           | 2,66E+05                    | ( 17)  | 1,36E+06                    | ( 87)   | 100     | 20 4   | 28.2           | 15.6       | 47.3  |
| 61           | 1,30E+05                    | ( 5)   | 3,13E+05                    | ( 12)   | 60      | 5 3    | 60.6           | 16.5       | 179.8 |
| 62           | 1,25E+05                    | ( 8)   | 2,50E+05                    | ( 16)   | 100     | 4 2    | 72.0           | 26.5       | 175.2 |
| 63           | 5,01E+05                    | ( 16)  | 8,14E+05                    | ( 26)   | 50      | 12 5   | 88.0           | 44.1       | 168.7 |
| 64           | 1,03E+06                    | ( 46)  | 2,73E+06                    | ( 122)  | 70      | 41 7   | 54.0           | 37.5       | 76.1  |
| 65           | 3,13E+05                    | ( 6)   | 5,22E+05                    | ( 10)   | 30      | 8 5    | 86.4           | 25.6       | 256.2 |
| 66           | 1,88E+05                    | ( 6)   | 4,38E+05                    | ( 14)   | 50      | 7 3    | 62.1           | 19.3       | 168.1 |
| 67           | 5,16E+05                    | ( 33)  | 1,35E+06                    | ( 86)   | 100     | 20 4   | 55.0           | 35.6       | 82.6  |
| 68           | 1,10E+05                    | ( 7)   | 6,10E+05                    | ( 39)   | 100     | 9 3    | 26.2           | 9.7        | 58.0  |
| 69           | 6,26E+04                    | ( 2)   | 1,25E+05                    | ( 4)    | 50      | 2 2    | 73.9           | 6.5        | 482.0 |
| 70           | 2,50E+05                    | ( 16)  | 8,14E+05                    | ( 52)   | 100     | 12 3   | 44.3           | 23.5       | 78.1  |
| 71           | 5,87E+04                    | ( 3)   | 5,48E+05                    | ( 28)   | 80      | 8 3    | 16.1           | 3.0        | 49.6  |
| 72           | 1,56E+05                    | ( 5)   | 2,82E+05                    | ( 9)    | 50      | 4 3    | 80.3           | 20.9       | 259.5 |
| POOLED       | 1,96E+05                    | ( 685) | 6,77E+05                    | ( 2369) | 5478    | 10 0   | 41.3           | 37.5       | 45.5  |

CHI^2 PROBABILITY (%): 0.3

&gt;&gt;&gt; Beware: possible upward bias in Chi^2 probability due to low counts &lt;&lt;&lt;

|                |                          |       |         |                   |
|----------------|--------------------------|-------|---------|-------------------|
| POOLED AGE W/  | 68% CONF. INTERVAL (Ma): | 41.3, | 39.4 -- | 43.4 ( -2.0 +2.1) |
|                | 95% CONF. INTERVAL (Ma): |       | 37.5 -- | 45.5 ( -3.8 +4.2) |
|                |                          |       |         |                   |
| CENTRAL AGE W/ | 68% CONF. INTERVAL (Ma): | 42.6, | 40.0 -- | 45.3 ( -2.6 +2.7) |
|                | 95% CONF. INTERVAL (Ma): |       | 37.7 -- | 48.1 ( -4.9 +5.5) |
|                | AGE DISPERSION (%):      | 27.1  |         |                   |

FIT OPTION: Best-fit peaks using the binomial model of Galbraith and Green

**INITIAL GUESS FOR MODEL PARAMETERS (number of peaks to fit = 2)**

| Peak #. | Peak Age | Theta | Fraction(%) | Count |
|---------|----------|-------|-------------|-------|
| 1.      | 41.30    | 0.224 | 23.4        | 16.81 |
| 2.      | 63.80    | 0.309 | 27.3        | 19.63 |

Total range for grain ages: 10,0 to 116,3 Ma  
 Number of active grains (Num. used for fit): 72  
 Number of removed grains: 0  
 Degrees of freedom for fit: 69  
 Average of the SE(Z)'s for the grains: 0,48  
 Estimated width of peaks in PD plot in Z units: 0,56

**PARAMETERS FOR BEST-FIT PEAKS**

\* Standard error for peak age includes group error

\* Peak width is for PD plot assuming a kernel factor = 0.60

| #. | Peak Age (Ma) | 68%CI        | 95%CI        | W(Z) | Frac(%) | SE, % | Count |
|----|---------------|--------------|--------------|------|---------|-------|-------|
| 1. | 26.8          | -3,0 ...+3,4 | -5,6 ...+7,1 | 0.44 | 31.3    | 10.5  | 22.5  |
| 2. | 52.3          | -3,6 ...+3,9 | -6,8 ...+7,8 | 0.43 | 68.7    | 10.5  | 49.5  |

Log-likelihood for best fit: -173,701  
 Chi-squared value for best fit: 61,407  
 Reduced chi-squared value: 0,890  
 Probability for F test: 0%  
 Condition number for COVAR matrix: 6,12  
 Number of iterations: 21

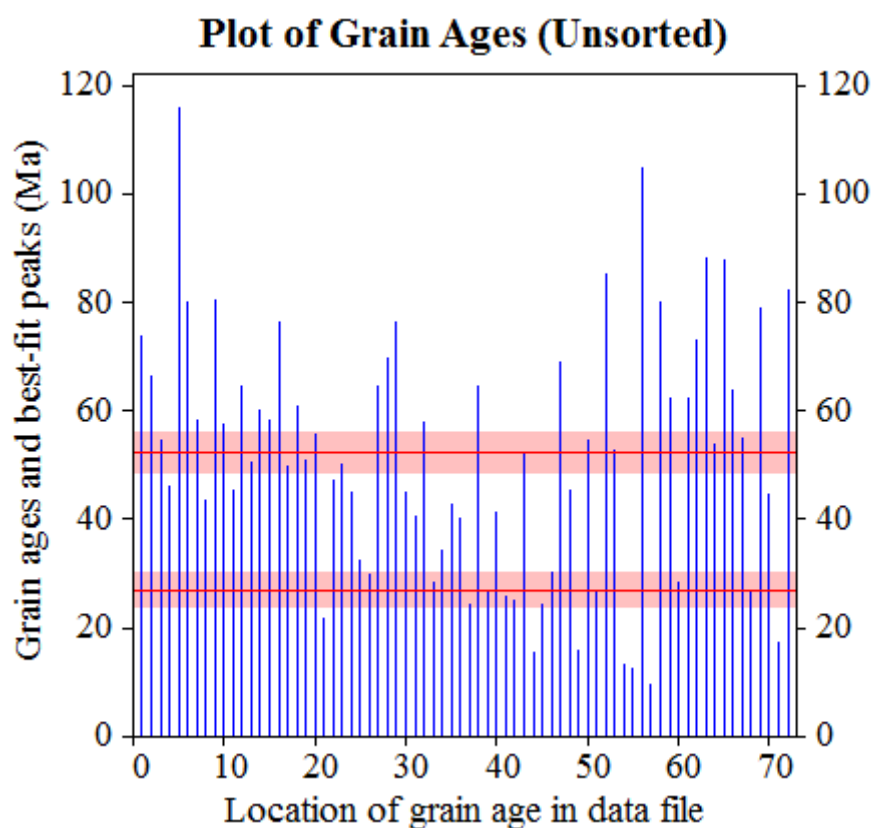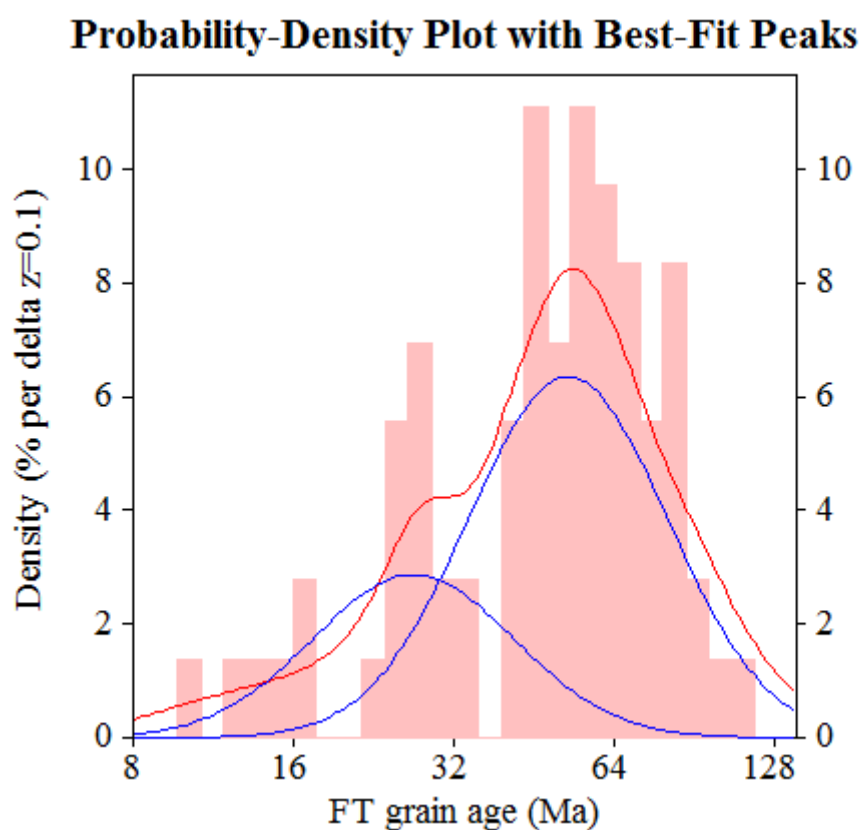



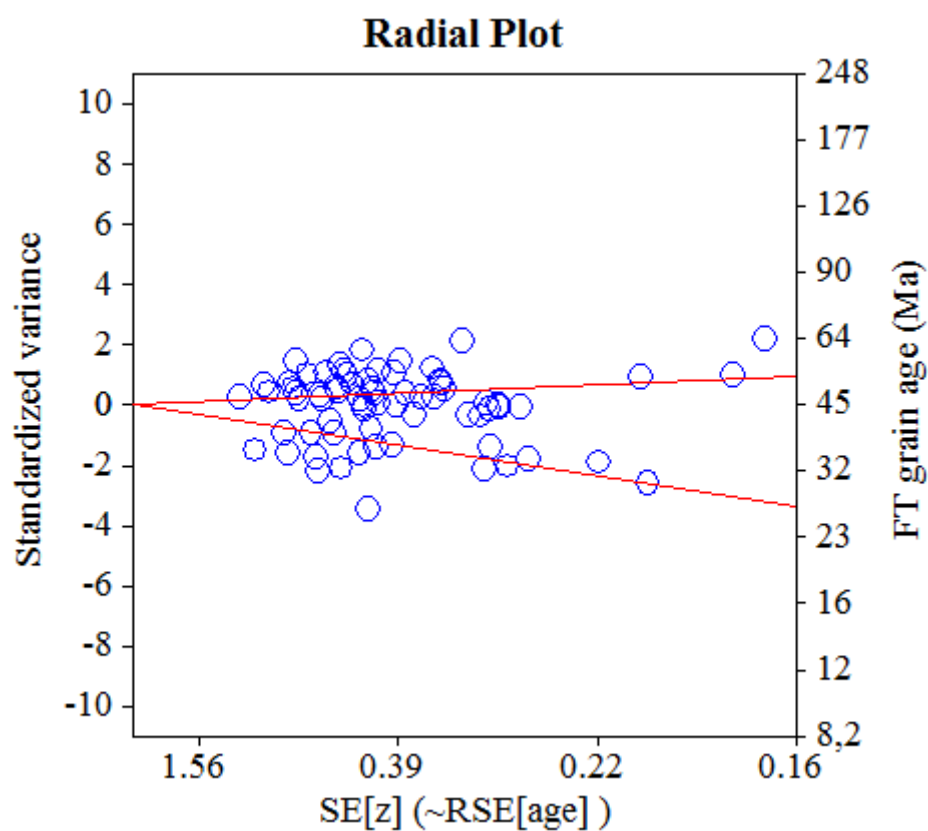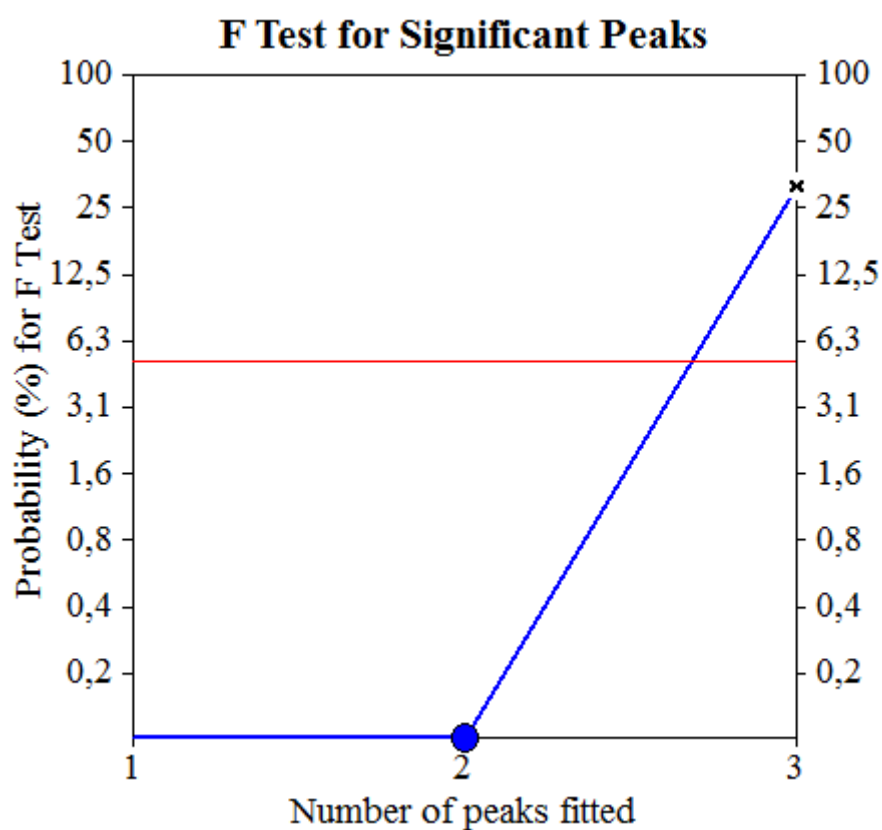

## NEW PARAMETERS - ZETA METHOD

EFFECTIVE TRACK DENSITY FOR FLUENCE MONITOR (tracks/cm<sup>2</sup>): 1,31E+06  
 RELATIVE ERROR (%): 1,11  
 EFFECTIVE URANIUM CONTENT OF MONITOR (ppm): 15,00  
 ZETA FACTOR AND STANDARD ERROR (yr cm<sup>2</sup>): 270,07 6,38  
 SIZE OF COUNTER SQUARE (cm<sup>2</sup>): 6,39E-07

## GRAIN AGES IN ORIGINAL ORDER

| Grain<br>no. | RhoS<br>(cm <sup>-2</sup> ) | (Ns)    | RhoI<br>(cm <sup>-2</sup> ) | (Ni)    | Squares | U+/-2s | Grain Age (Ma) |       |      |
|--------------|-----------------------------|---------|-----------------------------|---------|---------|--------|----------------|-------|------|
|              |                             |         |                             |         |         |        | Age            | --95% | CI-- |
| 1            | 6,26E+05                    | ( 40)   | 3,80E+06                    | ( 243)  | 100     | 44 6   | 29.0           | 20.2  | 40.6 |
| 2            | 4,23E+05                    | ( 27)   | 2,27E+06                    | ( 145)  | 100     | 26 4   | 32.9           | 20.9  | 49.6 |
| 3            | 5,48E+05                    | ( 35)   | 3,68E+06                    | ( 235)  | 100     | 42 6   | 26.3           | 17.8  | 37.5 |
| 4            | 3,60E+05                    | ( 23)   | 1,92E+06                    | ( 123)  | 100     | 22 4   | 33.1           | 20.1  | 51.6 |
| 5            | 3,76E+05                    | ( 24)   | 3,19E+06                    | ( 204)  | 100     | 37 5   | 20.8           | 13.0  | 31.7 |
| 6            | 6,57E+05                    | ( 42)   | 3,99E+06                    | ( 255)  | 100     | 46 6   | 29.1           | 20.4  | 40.3 |
| 7            | 1,33E+06                    | ( 85)   | 5,90E+06                    | ( 377)  | 100     | 68 7   | 39.6           | 31.1  | 50.3 |
| 8            | 1,75E+06                    | ( 112)  | 7,59E+06                    | ( 485)  | 100     | 87 8   | 40.5           | 32.8  | 50.0 |
| 9            | 5,48E+05                    | ( 35)   | 2,57E+06                    | ( 164)  | 100     | 30 5   | 37.6           | 25.3  | 54.3 |
| 10           | 4,07E+05                    | ( 26)   | 3,76E+06                    | ( 240)  | 100     | 43 6   | 19.2           | 12.2  | 28.6 |
| 11           | 1,03E+06                    | ( 66)   | 5,93E+06                    | ( 379)  | 100     | 68 7   | 30.6           | 23.5  | 39.9 |
| 12           | 5,95E+05                    | ( 38)   | 2,97E+06                    | ( 190)  | 100     | 34 5   | 35.3           | 24.1  | 50.0 |
| 13           | 5,63E+05                    | ( 36)   | 3,87E+06                    | ( 247)  | 100     | 44 6   | 25.7           | 17.5  | 36.5 |
| 14           | 2,35E+05                    | ( 15)   | 1,38E+06                    | ( 88)   | 100     | 16 3   | 30.2           | 16.1  | 52.1 |
| 15           | 1,72E+05                    | ( 11)   | 8,92E+05                    | ( 57)   | 100     | 10 3   | 34.3           | 16.1  | 65.2 |
| 16           | 4,38E+05                    | ( 28)   | 2,55E+06                    | ( 163)  | 100     | 29 5   | 30.3           | 19.5  | 45.3 |
| 17           | 7,51E+05                    | ( 48)   | 2,82E+06                    | ( 180)  | 100     | 32 5   | 46.9           | 33.3  | 64.7 |
| 18           | 4,23E+05                    | ( 27)   | 3,62E+06                    | ( 231)  | 100     | 42 6   | 20.7           | 13.3  | 30.7 |
| 19           | 9,55E+05                    | ( 61)   | 3,90E+06                    | ( 249)  | 100     | 45 6   | 43.0           | 32.4  | 57.0 |
| 20           | 3,91E+05                    | ( 25)   | 3,51E+06                    | ( 224)  | 100     | 40 5   | 19.8           | 12.4  | 29.8 |
| 21           | 8,14E+05                    | ( 52)   | 4,10E+06                    | ( 262)  | 100     | 47 6   | 35.0           | 25.4  | 47.1 |
| 22           | 6,57E+05                    | ( 42)   | 3,47E+06                    | ( 222)  | 100     | 40 5   | 33.4           | 23.3  | 46.4 |
| 23           | 5,16E+05                    | ( 33)   | 3,43E+06                    | ( 219)  | 100     | 39 5   | 26.6           | 17.8  | 38.3 |
| 24           | 7,20E+05                    | ( 46)   | 7,75E+06                    | ( 495)  | 100     | 89 8   | 16.4           | 11.8  | 22.2 |
| 25           | 5,01E+05                    | ( 16)   | 2,88E+06                    | ( 92)   | 50      | 33 7   | 30.8           | 16.8  | 52.3 |
| 26           | 7,82E+05                    | ( 50)   | 2,54E+06                    | ( 162)  | 100     | 29 5   | 54.3           | 38.6  | 74.7 |
| 27           | 2,97E+05                    | ( 19)   | 2,49E+06                    | ( 159)  | 100     | 29 5   | 21.2           | 12.3  | 33.9 |
| 28           | 3,60E+05                    | ( 23)   | 3,63E+06                    | ( 232)  | 100     | 42 6   | 17.6           | 10.8  | 26.8 |
| 29           | 1,10E+06                    | ( 42)   | 3,50E+06                    | ( 134)  | 60      | 40 7   | 55.1           | 38.0  | 78.2 |
| 30           | 5,39E+05                    | ( 31)   | 3,55E+06                    | ( 204)  | 90      | 41 6   | 26.8           | 17.7  | 39.1 |
| 31           | 1,03E+06                    | ( 66)   | 5,77E+06                    | ( 369)  | 100     | 66 7   | 31.4           | 24.1  | 41.0 |
| 32           | 7,04E+05                    | ( 45)   | 3,13E+06                    | ( 200)  | 100     | 36 5   | 39.6           | 28.0  | 54.8 |
| 33           | 1,27E+06                    | ( 81)   | 4,74E+06                    | ( 303)  | 100     | 55 6   | 46.9           | 36.6  | 60.1 |
| 34           | 5,32E+05                    | ( 17)   | 2,50E+06                    | ( 80)   | 50      | 29 6   | 37.6           | 20.8  | 63.5 |
| 35           | 2,35E+05                    | ( 15)   | 7,82E+05                    | ( 50)   | 100     | 9 3    | 53.1           | 27.5  | 95.0 |
| <hr/>        |                             |         |                             |         |         |        |                |       |      |
| POOLED       | 6,46E+05                    | ( 1382) | 3,58E+06                    | ( 7662) | 3350    | 41 1   | 31.7           | 29.4  | 34.2 |

CHI<sup>2</sup> PROBABILITY (%): 0.0

POOLED AGE W/ 68% CONF. INTERVAL (Ma): 31.7, 30.5 -- 33.0 ( -1.2 +1.3)  
 95% CONF. INTERVAL (Ma): 29.4 -- 34.2 ( -2.3 +2.5)

CENTRAL AGE W/ 68% CONF. INTERVAL (Ma): 31.9, 30.1 -- 33.9 ( -1.8 +1.9)  
 95% CONF. INTERVAL (Ma): 28.4 -- 35.8 ( -3.5 +3.9)  
 AGE DISPERSION (%): 25.3

*FIT OPTION: Best-fit peaks using the binomial model of Galbraith and Green*

**INITIAL GUESS FOR MODEL PARAMETERS (number of peaks to fit = 3)**

| Peak #. | Peak Age | Theta | Fraction(%) | Count |
|---------|----------|-------|-------------|-------|
| 1.      | 31.70    | 0.153 | 48.8        | 17.09 |
| 2.      | 48.60    | 0.217 | 20.3        | 7.11  |
| 3.      | 55.40    | 0.240 | 12.9        | 4.52  |

Total range for grain ages: 16,5 to 55,4 Ma  
 Number of active grains (Num. used for fit): 35  
 Number of removed grains: 0  
 Degrees of freedom for fit: 30  
 Average of the SE(Z)'s for the grains: 0,2  
 Estimated width of peaks in PD plot in Z units: 0,23

**PARAMETERS FOR BEST-FIT PEAKS**

\* Standard error for peak age includes group error

\* Peak width is for PD plot assuming a kernel factor = 0.60

| #. | Peak Age (Ma) | 68%CI        | 95%CI        | W(Z) | Frac(%) | SE, % | Count |
|----|---------------|--------------|--------------|------|---------|-------|-------|
| 1. | 19.2          | -2,0 ...+2,3 | -3,8 ...+4,7 | 0.23 | 17.3    | 10.1  | 6.1   |
| 2. | 29.8          | -2,3 ...+2,5 | -4,4 ...+5,1 | 0.21 | 48.8    | 14.5  | 17.1  |
| 3. | 42.0          | -2,8 ...+3,0 | -5,4 ...+6,1 | 0.18 | 33.9    | 13.0  | 11.9  |

Log-likelihood for best fit: -126,208  
 Chi-squared value for best fit: 33,775  
 Reduced chi-squared value: 1,126  
 Probability for F test: 5%  
 Condition number for COVAR matrix: 11,08  
 Number of iterations: 48

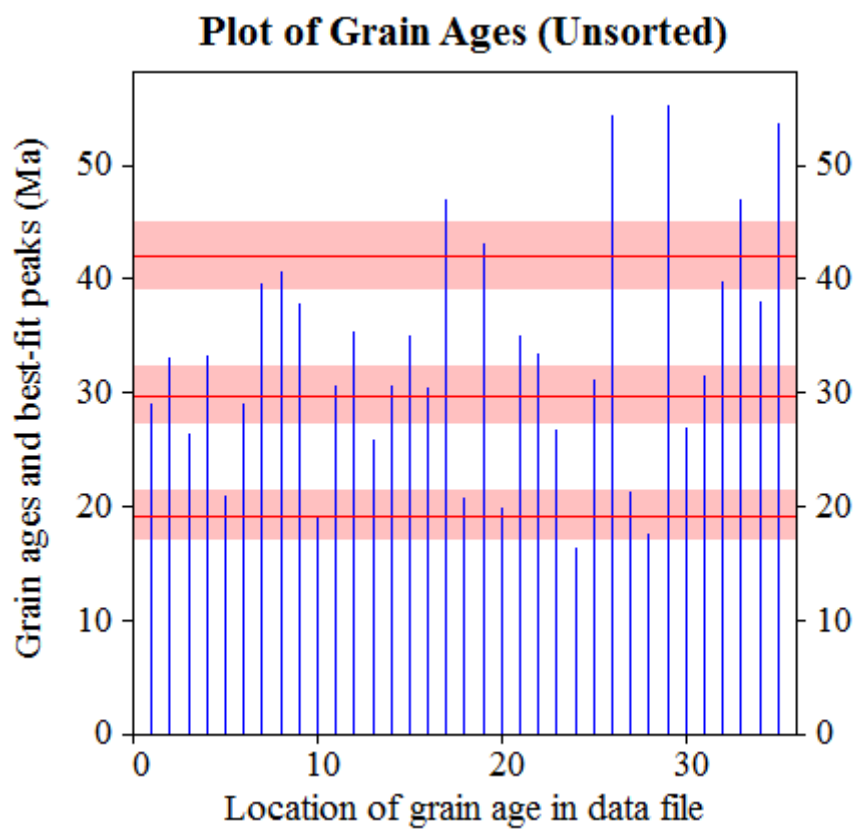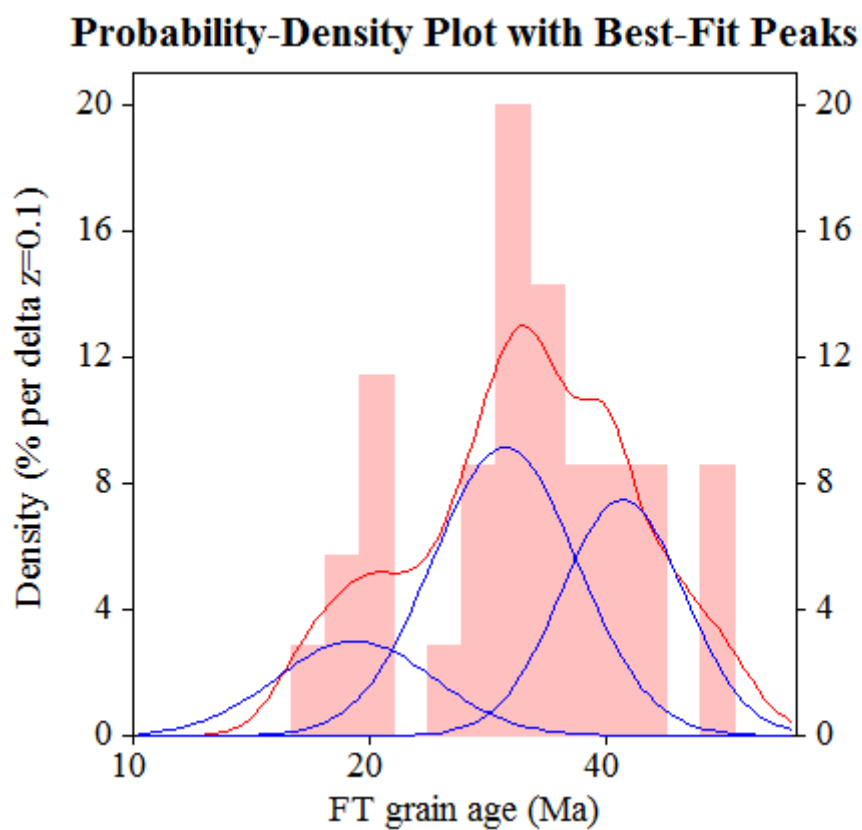

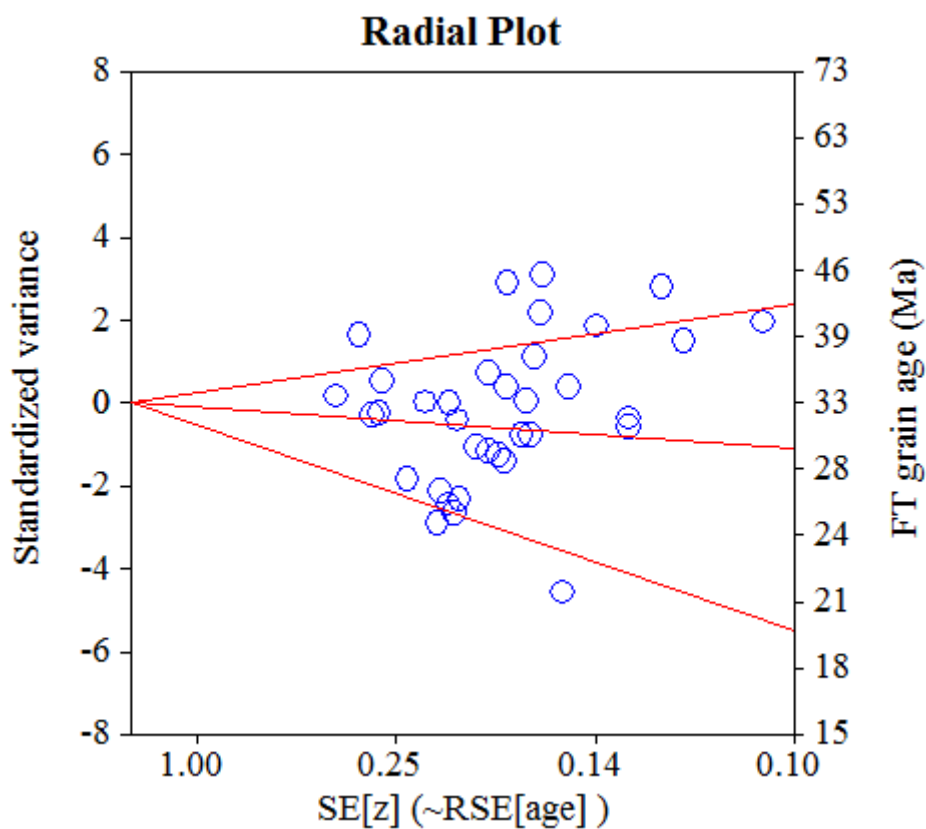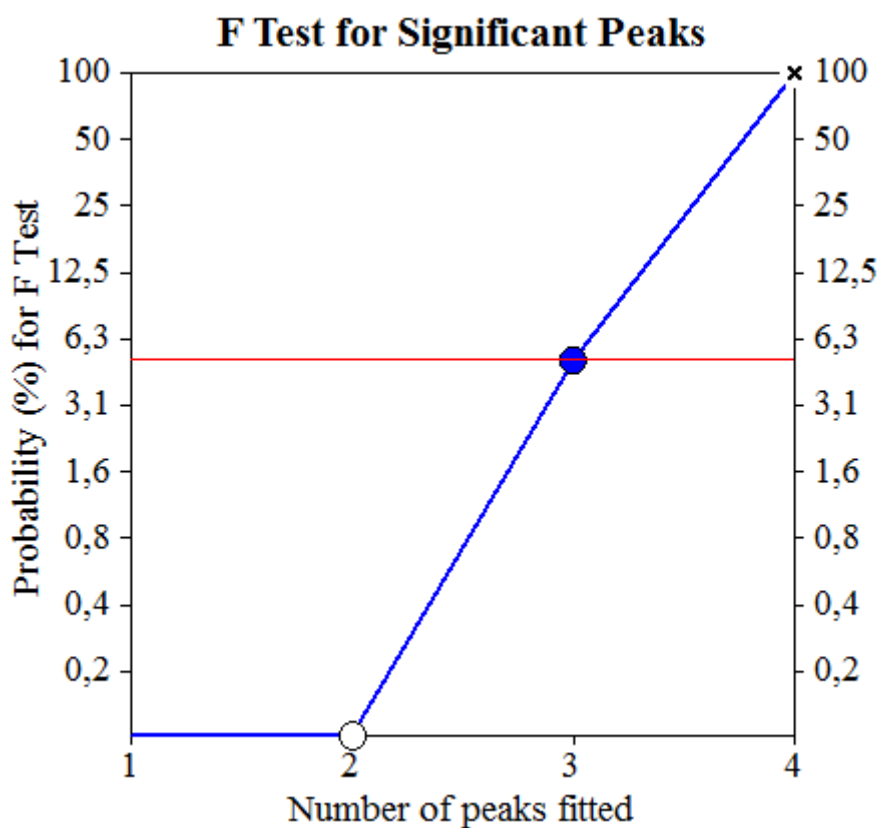

Datafile: C:\BH2\Alejandro\AFT\11-2015\EMP\_16\EMP\_16.ftz

Title: EMP\_16 Irr 11-2015-10

## NEW PARAMETERS - ZETA METHOD

EFFECTIVE TRACK DENSITY FOR FLUENCE MONITOR (tracks/cm<sup>2</sup>): 1,02E+06

RELATIVE ERROR (%): 1,24

EFFECTIVE URANIUM CONTENT OF MONITOR (ppm): 15,00

ZETA FACTOR AND STANDARD ERROR (yr cm<sup>2</sup>): 284,52 5,65SIZE OF COUNTER SQUARE (cm<sup>2</sup>): 6,39E-07

## GRAIN AGES IN ORIGINAL ORDER

| Grain no. | RhoS (cm <sup>-2</sup> ) | (Ns)   | RhoI (cm <sup>-2</sup> ) | (Ni)    | Squares | U+/-2s | Grain Age (Ma) |            |       |
|-----------|--------------------------|--------|--------------------------|---------|---------|--------|----------------|------------|-------|
|           |                          |        |                          |         |         |        | Age            | --95% CI-- |       |
| 1         | 3,29E+05                 | ( 21)  | 5,32E+05                 | ( 34)   | 100     | 8 3    | 89.2           | 49.2       | 157.0 |
| 2         | 1,96E+05                 | ( 10)  | 1,33E+06                 | ( 68)   | 80      | 20 5   | 21.6           | 9.8        | 41.5  |
| 3         | 2,03E+05                 | ( 13)  | 4,69E+05                 | ( 30)   | 100     | 7 3    | 63.0           | 30.0       | 123.0 |
| 4         | 6,26E+04                 | ( 4)   | 1,88E+05                 | ( 12)   | 100     | 3 2    | 49.4           | 11.3       | 157.6 |
| 5         | 1,56E+05                 | ( 10)  | 7,36E+05                 | ( 47)   | 100     | 11 3   | 31.2           | 13.9       | 61.6  |
| 6         | 2,82E+05                 | ( 18)  | 4,23E+05                 | ( 27)   | 100     | 6 2    | 96.2           | 49.9       | 179.6 |
| 7         | 2,97E+05                 | ( 19)  | 6,73E+05                 | ( 43)   | 100     | 10 3   | 64.1           | 35.1       | 111.4 |
| 8         | 4,69E+04                 | ( 3)   | 2,97E+05                 | ( 19)   | 100     | 4 2    | 23.9           | 4.3        | 77.3  |
| 9         | 2,35E+05                 | ( 9)   | 4,43E+05                 | ( 17)   | 60      | 7 3    | 76.9           | 30.1       | 179.6 |
| 10        | 4,69E+04                 | ( 3)   | 2,35E+05                 | ( 15)   | 100     | 3 2    | 30.1           | 5.4        | 101.7 |
| 11        | 1,41E+05                 | ( 9)   | 1,00E+06                 | ( 64)   | 100     | 15 4   | 20.7           | 8.9        | 41.1  |
| 12        | 2,03E+05                 | ( 13)  | 5,01E+05                 | ( 32)   | 100     | 7 3    | 59.1           | 28.3       | 114.4 |
| 13        | 2,03E+05                 | ( 13)  | 3,60E+05                 | ( 23)   | 100     | 5 2    | 81.9           | 38.0       | 166.6 |
| 14        | 3,80E+05                 | ( 17)  | 7,82E+05                 | ( 35)   | 70      | 12 4   | 70.4           | 36.9       | 127.9 |
| 15        | 1,25E+05                 | ( 8)   | 7,51E+05                 | ( 48)   | 100     | 11 3   | 24.5           | 9.9        | 51.4  |
| 16        | 2,24E+05                 | ( 10)  | 4,92E+05                 | ( 22)   | 70      | 7 3    | 66.1           | 27.8       | 143.5 |
| 17        | 6,71E+04                 | ( 3)   | 6,04E+05                 | ( 27)   | 70      | 9 3    | 16.8           | 3.1        | 52.2  |
| 18        | 7,82E+04                 | ( 5)   | 5,32E+05                 | ( 34)   | 100     | 8 3    | 21.9           | 6.5        | 54.6  |
| 19        | 6,26E+04                 | ( 4)   | 3,13E+05                 | ( 20)   | 100     | 5 2    | 29.9           | 7.2        | 86.0  |
| 20        | 4,38E+05                 | ( 28)  | 3,16E+06                 | ( 202)  | 100     | 47 7   | 20.2           | 13.0       | 29.9  |
| 21        | 2,66E+05                 | ( 17)  | 7,98E+05                 | ( 51)   | 100     | 12 3   | 48.5           | 26.1       | 84.6  |
| 22        | 5,48E+05                 | ( 35)  | 9,23E+05                 | ( 59)   | 100     | 14 4   | 85.6           | 54.7       | 131.6 |
| 23        | 3,13E+05                 | ( 12)  | 1,98E+06                 | ( 76)   | 60      | 29 7   | 23.1           | 11.3       | 42.2  |
| 24        | 8,76E+05                 | ( 56)  | 7,10E+06                 | ( 454)  | 100     | 105 10 | 17.9           | 13.5       | 23.6  |
| 25        | 2,19E+05                 | ( 14)  | 4,23E+05                 | ( 27)   | 100     | 6 2    | 75.2           | 36.3       | 146.9 |
| 26        | 2,82E+05                 | ( 18)  | 9,08E+05                 | ( 58)   | 100     | 13 4   | 45.1           | 24.9       | 77.1  |
| 27        | 5,09E+05                 | ( 26)  | 7,63E+05                 | ( 39)   | 80      | 11 4   | 96.1           | 56.2       | 160.9 |
| 28        | 1,56E+05                 | ( 10)  | 5,16E+05                 | ( 33)   | 100     | 8 3    | 44.3           | 19.3       | 90.7  |
| 29        | 1,25E+05                 | ( 8)   | 7,67E+05                 | ( 49)   | 100     | 11 3   | 24.0           | 9.7        | 50.2  |
| 30        | 4,54E+05                 | ( 29)  | 1,35E+06                 | ( 86)   | 100     | 20 4   | 48.9           | 30.8       | 74.9  |
| 31        | 2,66E+05                 | ( 17)  | 1,13E+06                 | ( 72)   | 100     | 17 4   | 34.4           | 18.9       | 58.5  |
| 32        | 1,56E+05                 | ( 8)   | 1,21E+06                 | ( 62)   | 80      | 18 5   | 19.0           | 7.7        | 39.1  |
| 33        | 3,13E+05                 | ( 20)  | 1,03E+06                 | ( 66)   | 100     | 15 4   | 44.0           | 25.2       | 73.0  |
| 34        | 1,72E+05                 | ( 11)  | 8,92E+05                 | ( 57)   | 100     | 13 3   | 28.3           | 13.2       | 53.7  |
| 35        | 1,41E+05                 | ( 9)   | 5,95E+05                 | ( 38)   | 100     | 9 3    | 34.7           | 14.6       | 71.9  |
| 36        | 1,56E+05                 | ( 10)  | 5,48E+05                 | ( 35)   | 100     | 8 3    | 41.8           | 18.3       | 85.0  |
| 37        | 2,97E+05                 | ( 19)  | 8,14E+05                 | ( 52)   | 100     | 12 3   | 53.0           | 29.5       | 90.5  |
| 38        | 2,82E+05                 | ( 18)  | 5,63E+05                 | ( 36)   | 100     | 8 3    | 72.4           | 38.6       | 129.8 |
| POOLED    | 2,44E+05                 | ( 557) | 9,51E+05                 | ( 2169) | 3570    | 14 1   | 37.1           | 33.5       | 41.2  |

CHI<sup>2</sup> PROBABILITY (%): 0.0>>> Beware: possible upward bias in Chi<sup>2</sup> probability due to low counts <<<

POOLED AGE W/ 68% CONF. INTERVAL (Ma): 37.1, 35.2 -- 39.1 ( -1.9 +2.0)  
 95% CONF. INTERVAL (Ma): 33.5 -- 41.2 ( -3.6 +4.0)

CENTRAL AGE W/ 68% CONF. INTERVAL (Ma): 43.3, 39.5 -- 47.4 ( -3.7 +4.1)  
 95% CONF. INTERVAL (Ma): 36.2 -- 51.6 ( -7.0 +8.4)  
 AGE DISPERSION (%): 43.3

*FIT OPTION: Best-fit peaks using the binomial model of Galbraith and Green*

**INITIAL GUESS FOR MODEL PARAMETERS (number of peaks to fit = 2)**

| Peak #. | Peak Age | Theta | Fraction(%) | Count |
|---------|----------|-------|-------------|-------|
| 1.      | 22.50    | 0.135 | 19.4        | 7.37  |
| 2.      | 37.10    | 0.204 | 17.7        | 6.71  |

Total range for grain ages: 18,0 to 96,8 Ma  
 Number of active grains (Num. used for fit): 38  
 Number of removed grains: 0  
 Degrees of freedom for fit: 35  
 Average of the SE(Z)'s for the grains: 0,36  
 Estimated width of peaks in PD plot in Z units: 0,42

**PARAMETERS FOR BEST-FIT PEAKS**

\* Standard error for peak age includes group error

\* Peak width is for PD plot assuming a kernel factor = 0.60

| #. | Peak Age (Ma) | 68%CI        | 95%CI         | W(Z) | Frac(%) | SE, % | Count |
|----|---------------|--------------|---------------|------|---------|-------|-------|
| 1. | 21.8          | -1,9 ...+2,1 | -3,6 ...+4,3  | 0.35 | 41.0    | 9.9   | 15.6  |
| 2. | 59.9          | -4,6 ...+5,0 | -8,6 ...+10,1 | 0.35 | 59.0    | 9.9   | 22.4  |

Log-likelihood for best fit: -113,730  
 Chi-squared value for best fit: 34,537  
 Reduced chi-squared value: 0,987  
 Probability for F test: 0%  
 Condition number for COVAR matrix: 2,68  
 Number of iterations: 9

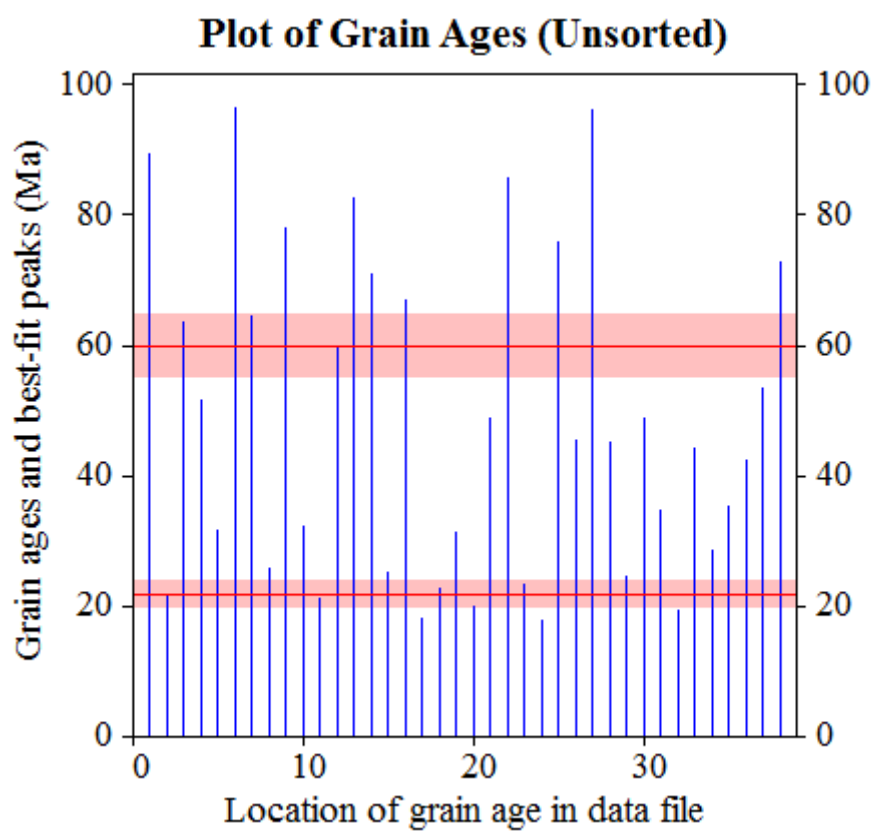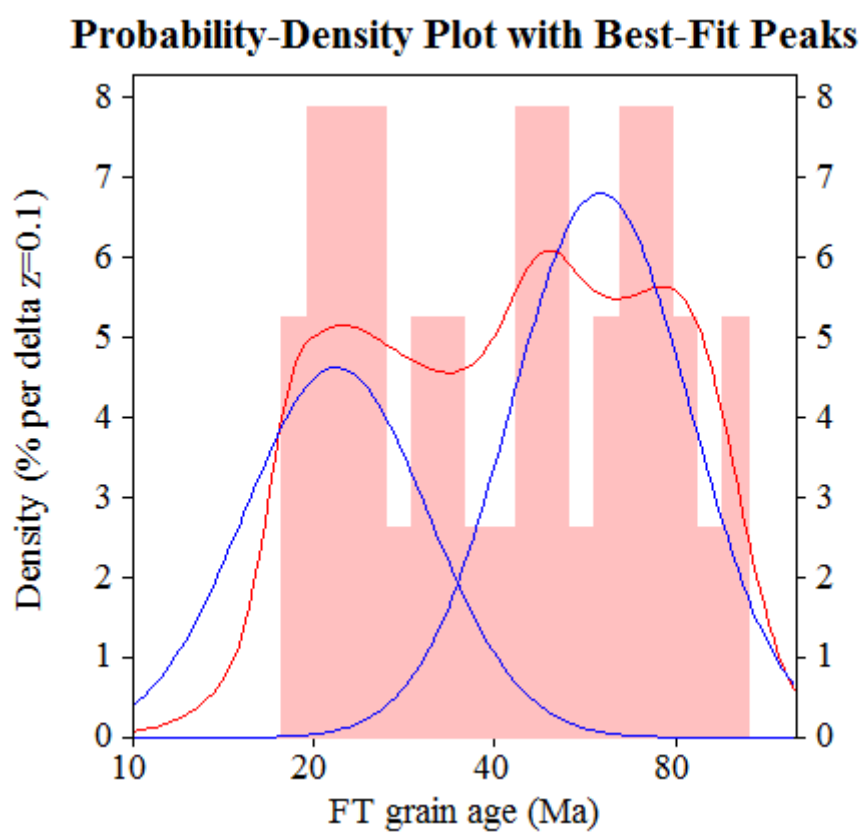



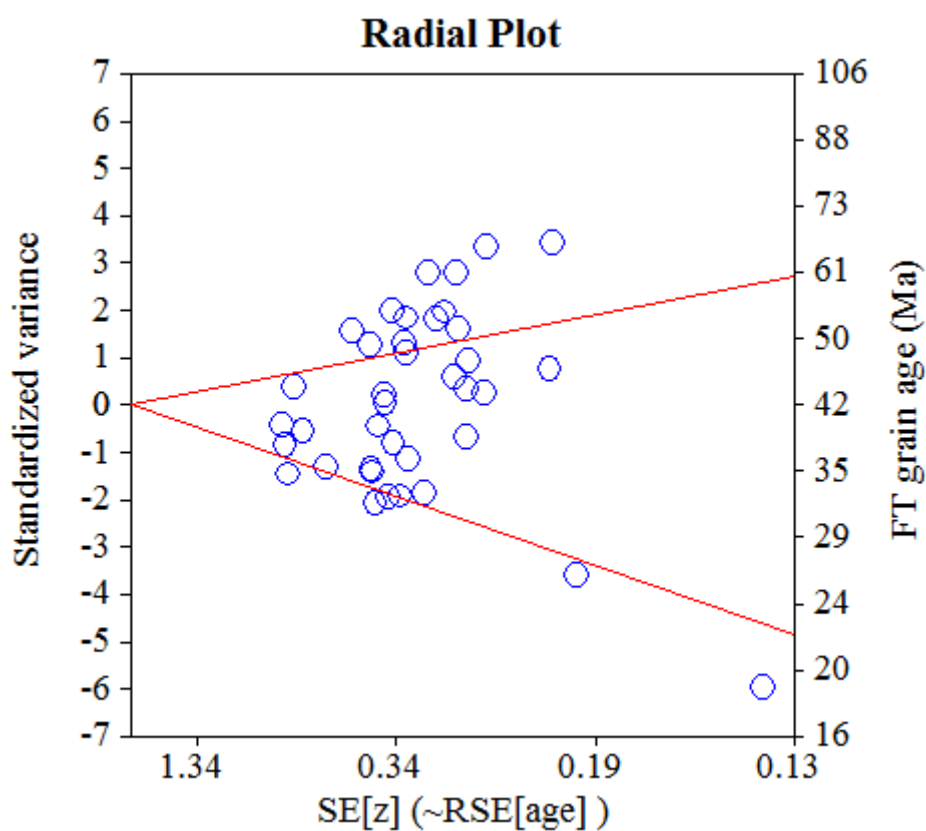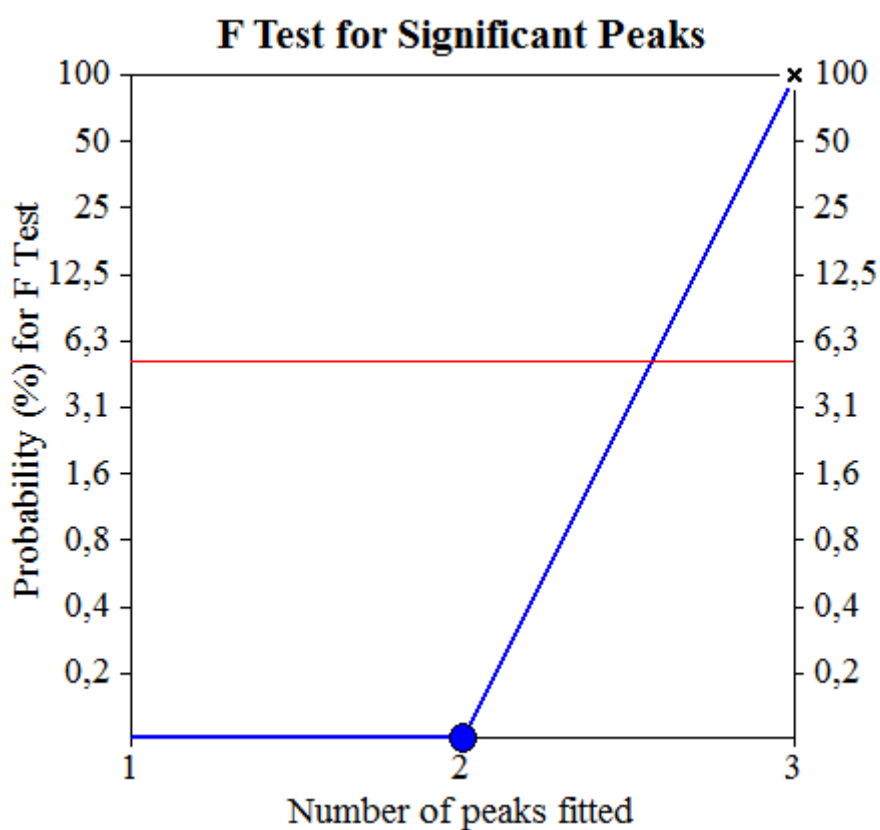

**NEW PARAMETERS - ZETA METHOD**

EFFECTIVE TRACK DENSITY FOR FLUENCE MONITOR (tracks/cm<sup>2</sup>): 1,26E+06  
 RELATIVE ERROR (%): 1,15  
 EFFECTIVE URANIUM CONTENT OF MONITOR (ppm): 15,00  
 ZETA FACTOR AND STANDARD ERROR (yr cm<sup>2</sup>): 288,88 16,55  
 SIZE OF COUNTER SQUARE (cm<sup>2</sup>): 6,39E-07

**GRAIN AGES IN ORIGINAL ORDER**

| Grain<br>no. | RhoS<br>(cm <sup>-2</sup> ) | (Ns)   | RhoI<br>(cm <sup>-2</sup> ) | (Ni)   | Squares | U+/-2s | Grain Age (Ma) |            |       |
|--------------|-----------------------------|--------|-----------------------------|--------|---------|--------|----------------|------------|-------|
|              |                             |        |                             |        |         |        | Age            | --95% CI-- |       |
| 1            | 2,35E+05                    | ( 15)  | 6,26E+05                    | ( 40)  | 100     | 7 2    | 68.2           | 34.8       | 124.8 |
| 2            | 1,56E+05                    | ( 8)   | 8,22E+05                    | ( 42)  | 80      | 10 3   | 35.1           | 14.0       | 74.2  |
| 3            | 3,13E+05                    | ( 20)  | 1,50E+06                    | ( 96)  | 100     | 18 4   | 38.0           | 22.1       | 61.4  |
| 4            | 5,95E+05                    | ( 38)  | 1,22E+06                    | ( 78)  | 100     | 15 3   | 88.0           | 58.1       | 130.7 |
| 5            | 2,50E+05                    | ( 16)  | 9,23E+05                    | ( 59)  | 100     | 11 3   | 49.4           | 26.4       | 86.2  |
| 6            | 4,23E+05                    | ( 27)  | 1,36E+06                    | ( 87)  | 100     | 16 3   | 56.3           | 35.0       | 87.1  |
| 7            | 1,72E+05                    | ( 11)  | 1,11E+06                    | ( 71)  | 100     | 13 3   | 28.4           | 13.4       | 53.2  |
| 8            | 1,25E+05                    | ( 8)   | 3,29E+05                    | ( 21)  | 100     | 4 2    | 69.7           | 26.4       | 160.6 |
| POOLED       | 2,87E+05                    | ( 143) | 9,91E+05                    | ( 494) | 780     | 12 1   | 52.3           | 42.1       | 65.0  |

CHI<sup>2</sup> PROBABILITY (%): 3.3

|                |                          |       |         |                    |
|----------------|--------------------------|-------|---------|--------------------|
| POOLED AGE W/  | 68% CONF. INTERVAL (Ma): | 52.3, | 46.8 -- | 58.4 ( -5.5 +6.1)  |
|                | 95% CONF. INTERVAL (Ma): |       | 42.1 -- | 65.0 (-10.2 +12.7) |
| CENTRAL AGE W/ | 68% CONF. INTERVAL (Ma): | 51.9, | 44.9 -- | 60.1 ( -7.1 +8.2)  |
|                | 95% CONF. INTERVAL (Ma): |       | 39.0 -- | 69.2 (-13.0 +17.3) |
|                | AGE DISPERSION (%):      | 26.2  |         |                    |

*FIT OPTION: Best-fit peaks using the binomial model of Galbraith and Green*

**INITIAL GUESS FOR MODEL PARAMETERS (number of peaks to fit = 2)**

| Peak #. | Peak Age | Theta | Fraction(%) | Count |
|---------|----------|-------|-------------|-------|
| 1.      | 29.10    | 0.139 | 17.2        | 1.38  |
| 2.      | 52.30    | 0.224 | 32.7        | 2.61  |

Total range for grain ages: 29,1 to 88,4 Ma  
 Number of active grains (Num. used for fit): 8  
 Number of removed grains: 0  
 Degrees of freedom for fit: 5  
 Average of the SE(Z)'s for the grains: 0,3  
 Estimated width of peaks in PD plot in Z units: 0,35

**PARAMETERS FOR BEST-FIT PEAKS**

\* Standard error for peak age includes group error

\* Peak width is for PD plot assuming a kernel factor = 0.60

| #. | Peak Age (Ma) | 68%CI          | 95%CI          | W(Z) | Frac(%) | SE, % | Count |
|----|---------------|----------------|----------------|------|---------|-------|-------|
| 1. | 43.6          | -6,7 ...+7,9   | -12,2 ...+16,9 | 0.33 | 72.6    | 31.3  | 5.8   |
| 2. | 77.2          | -19,0 ...+25,2 | -32,9 ...+57,1 | 0.28 | 27.4    | 31.3  | 2.2   |

Log-likelihood for best fit: -23,278  
 Chi-squared value for best fit: 7,077  
 Reduced chi-squared value: 1,415  
 Probability for F test: 5%  
 Condition number for COVAR matrix: 9,94  
 Number of iterations: 32

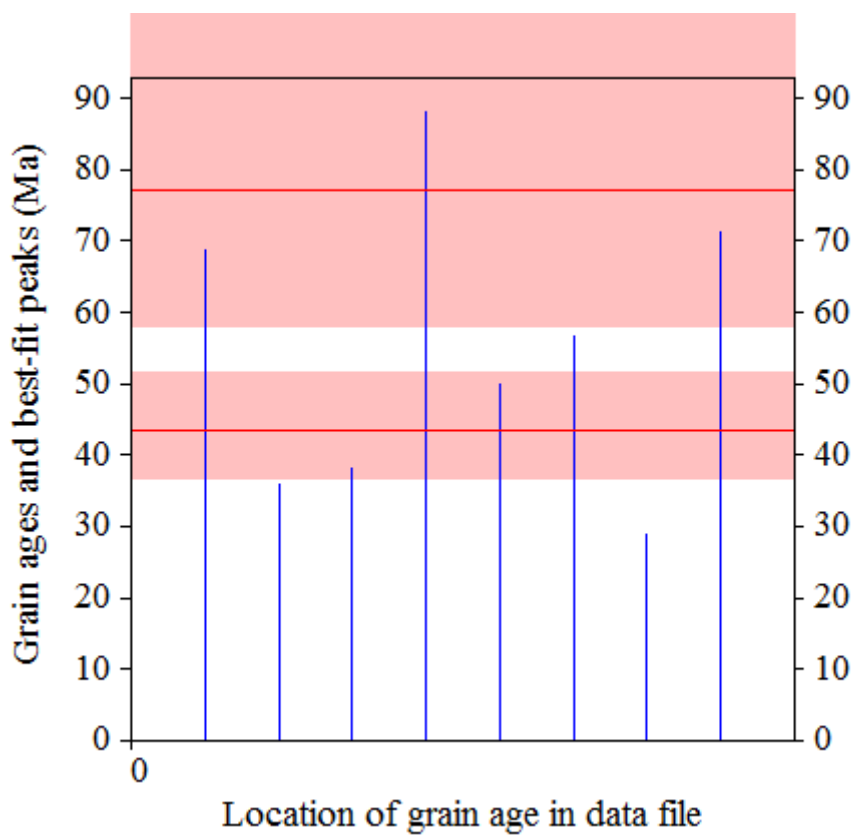

### Probability-Density Plot with Best-Fit Peaks

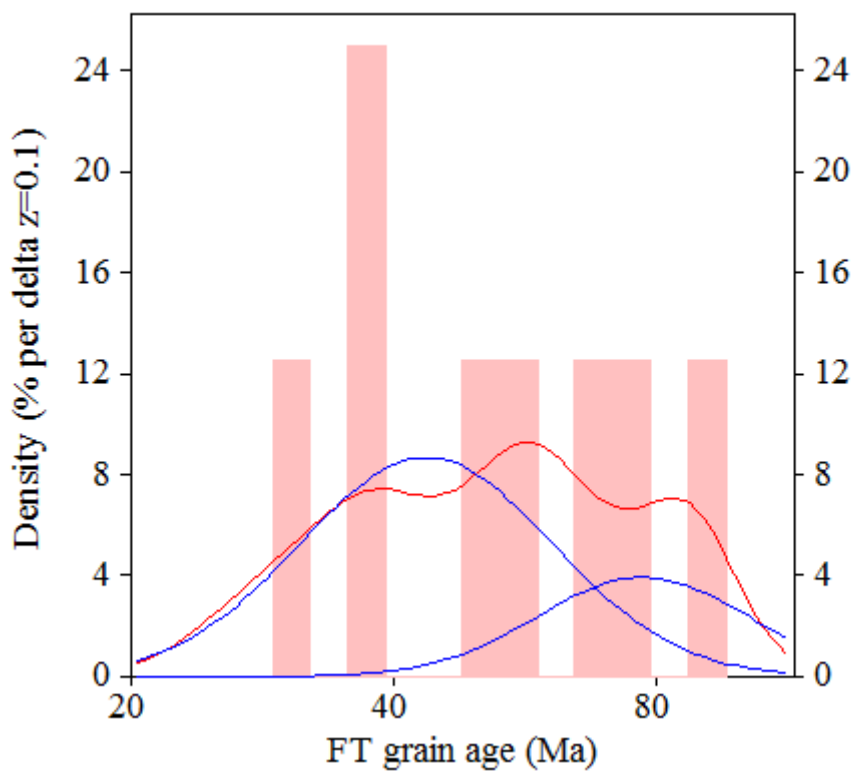

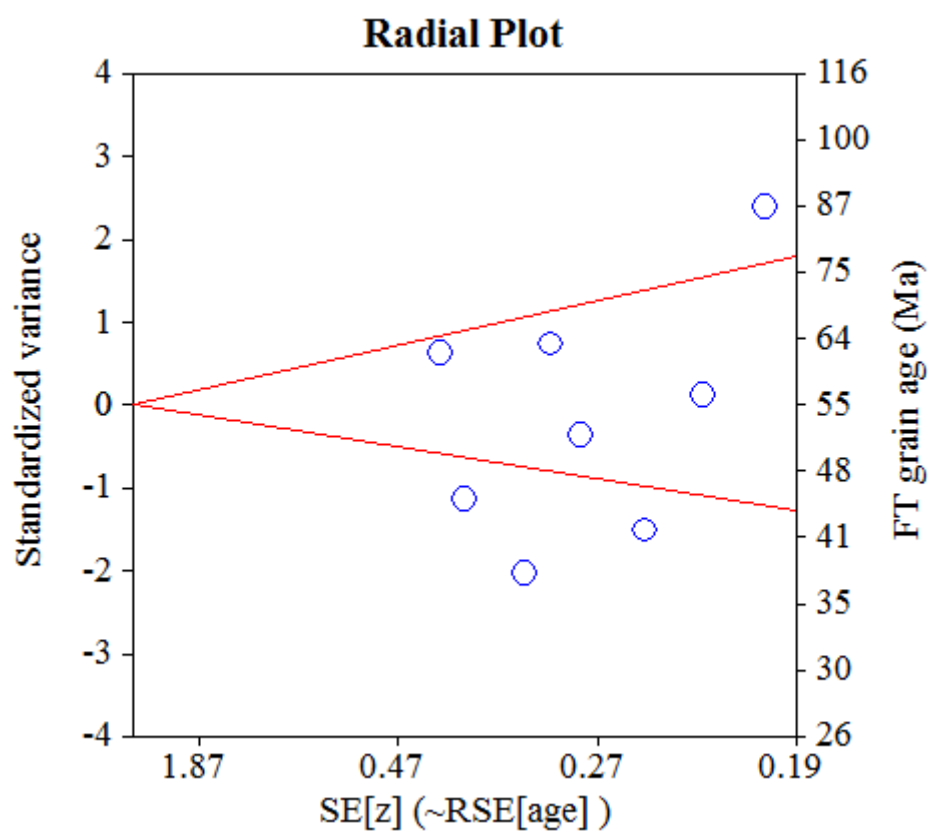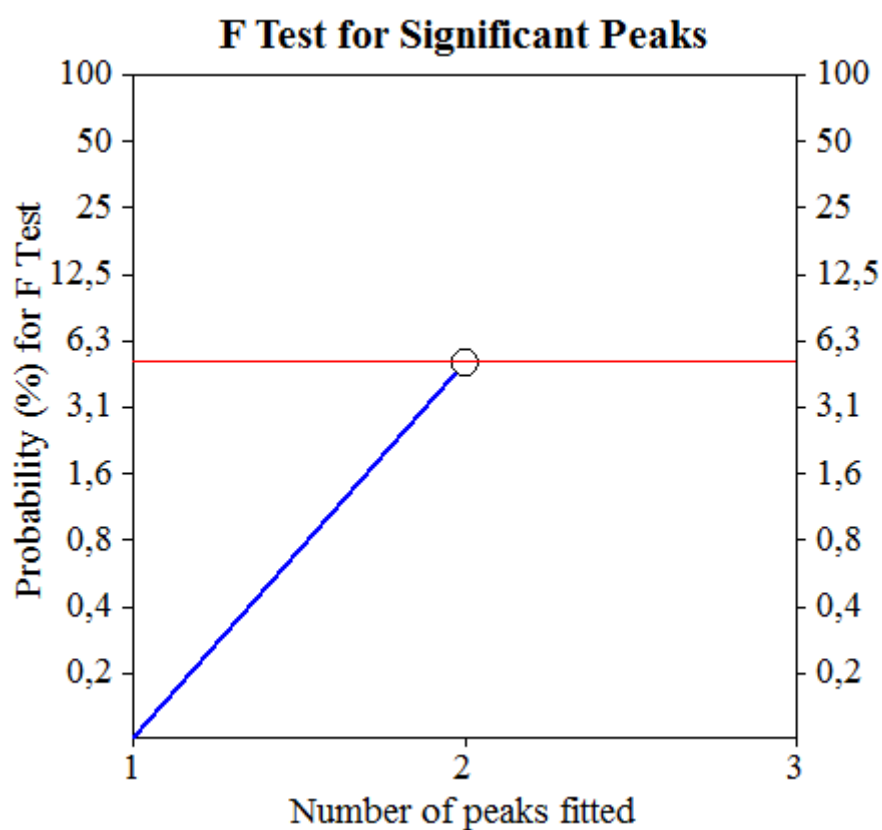

# AP-045

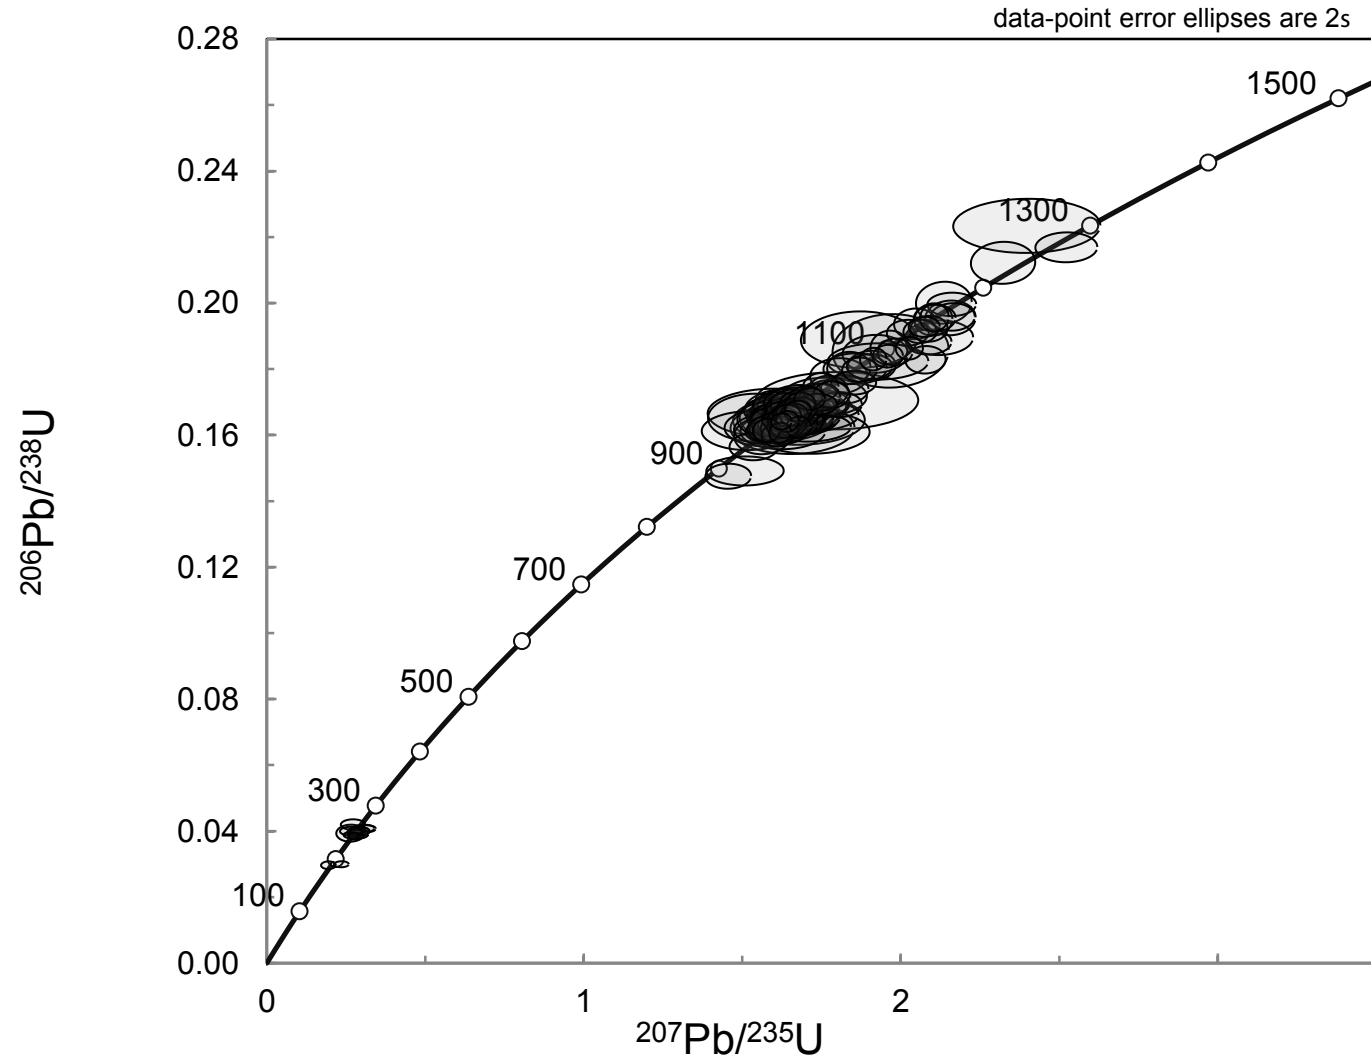

# CP-088

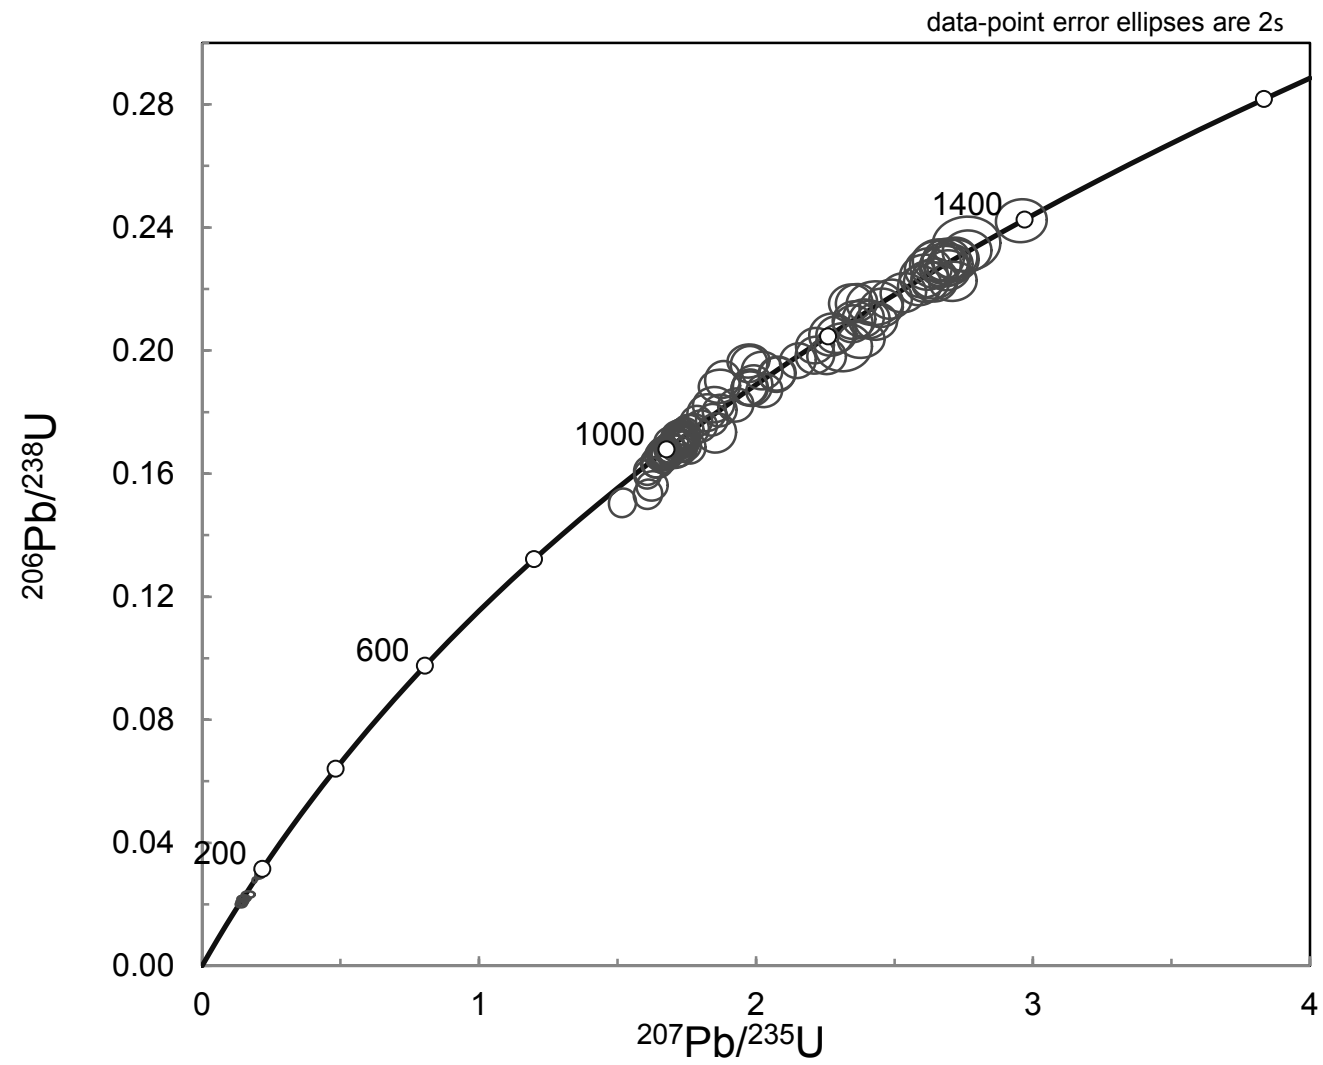

# CVI13-02

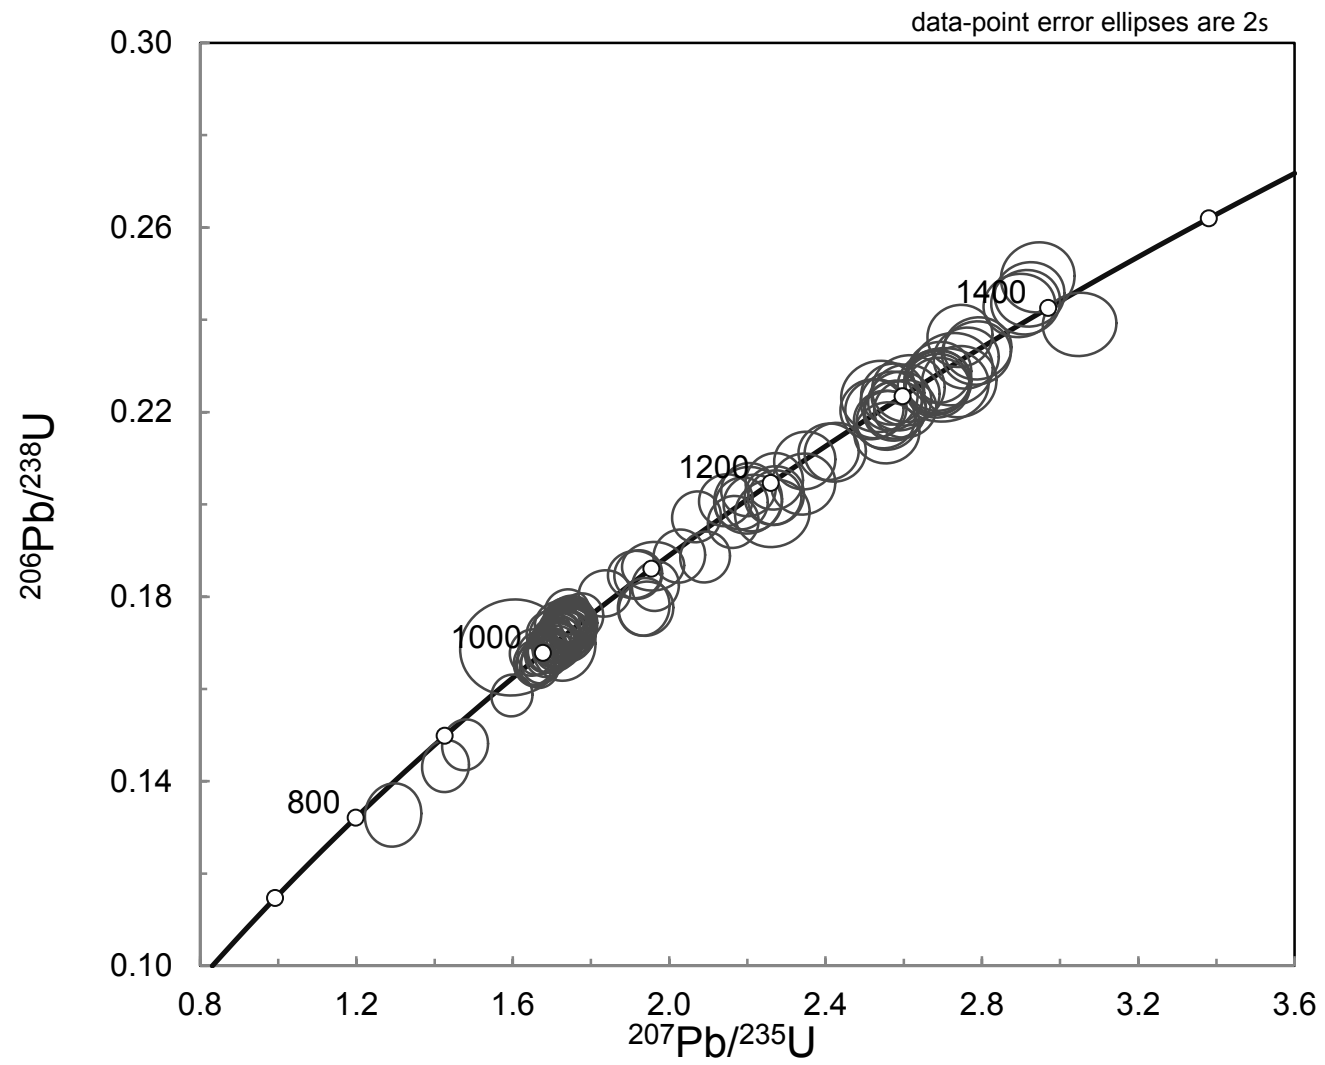



# CVI13-115

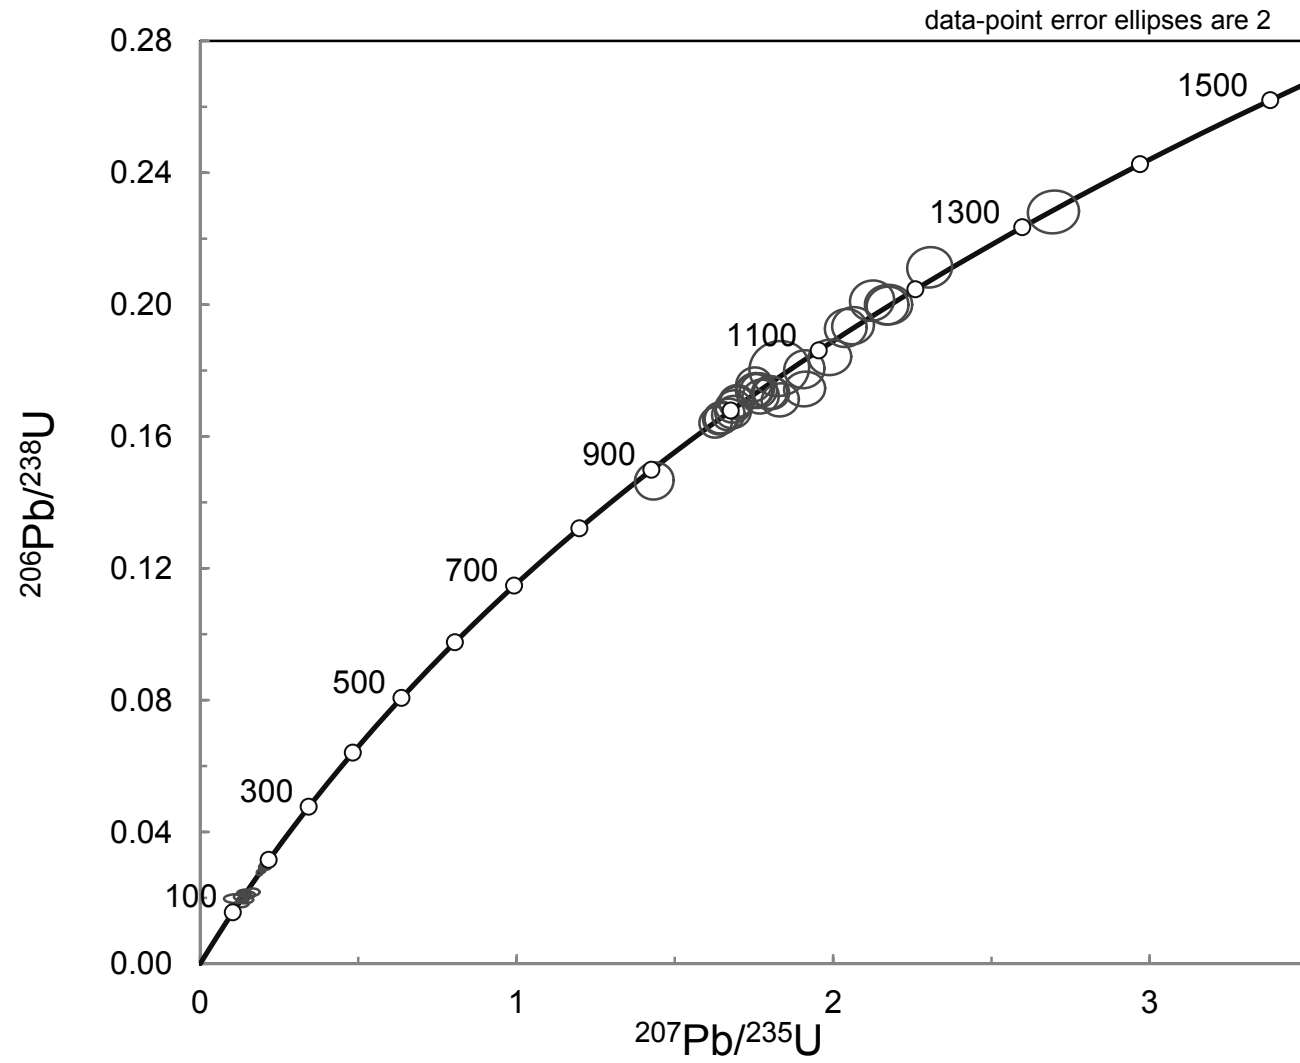

# EMP-16

data-point error ellipses are 2s

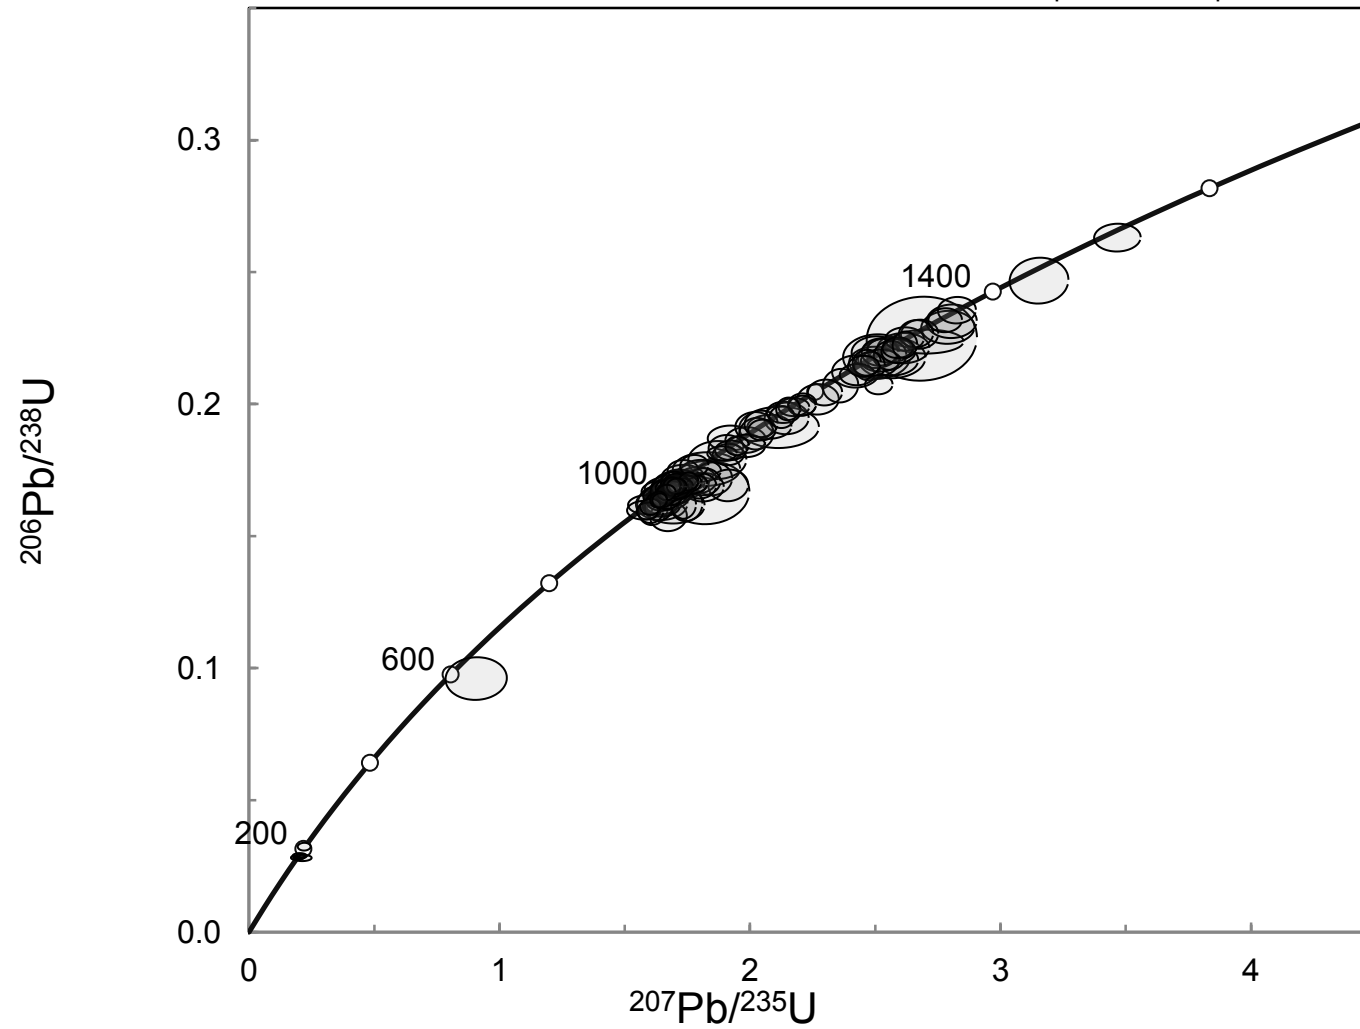

# EMP-49A

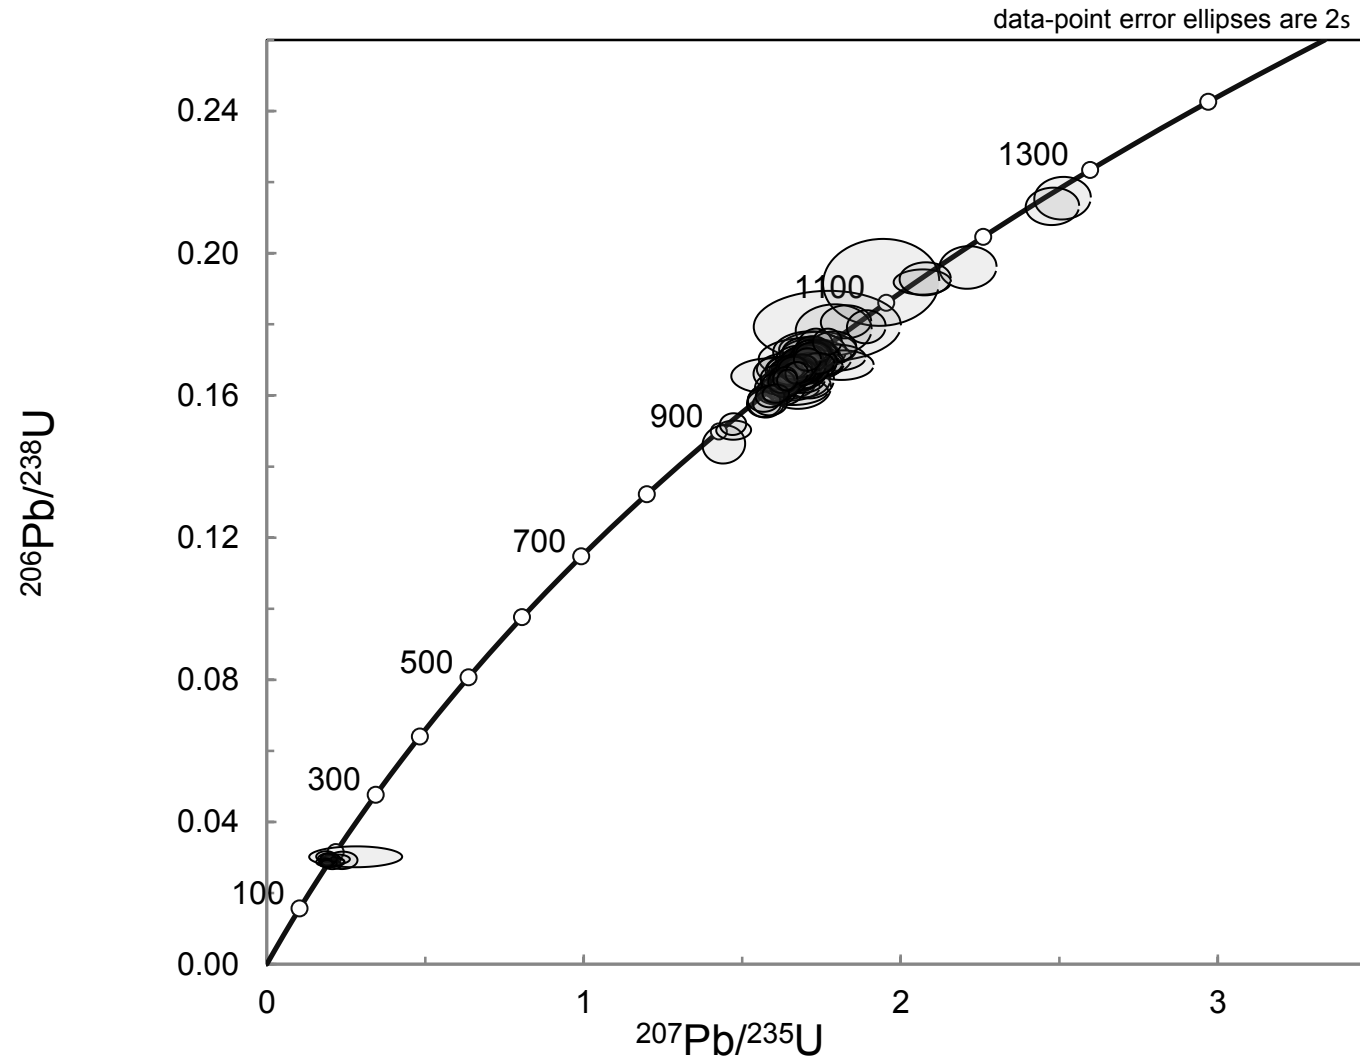

Supplement: Supplementary file 1 [file 1]
